# Supplementary material for: Principles of subclonal gene dosage across human cancer
Source: bioRxiv preprint, doi:10.64898/2026.03.15.711906, version 1 (2026-03-18)

ALL1


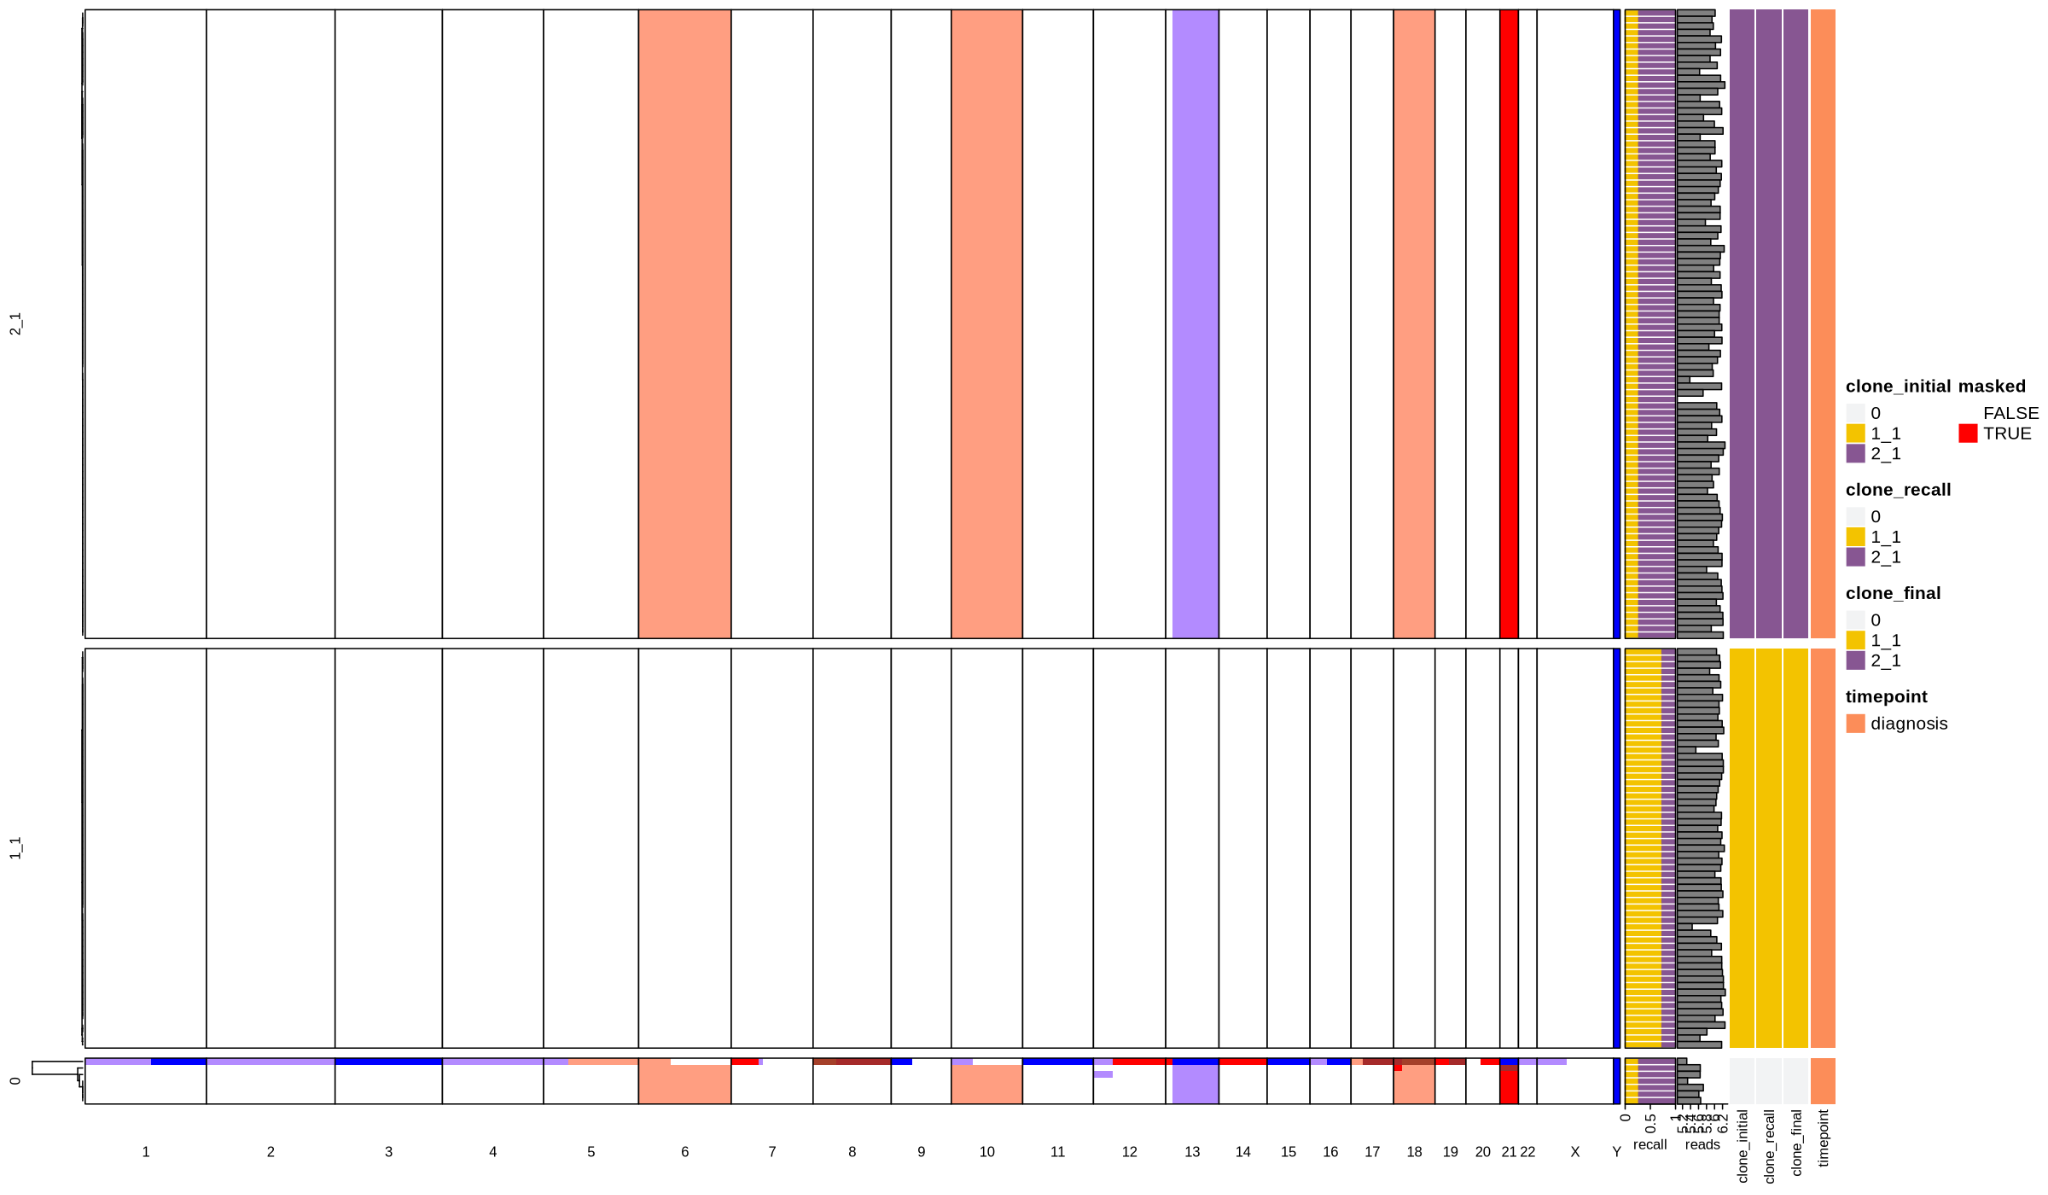


ALL2


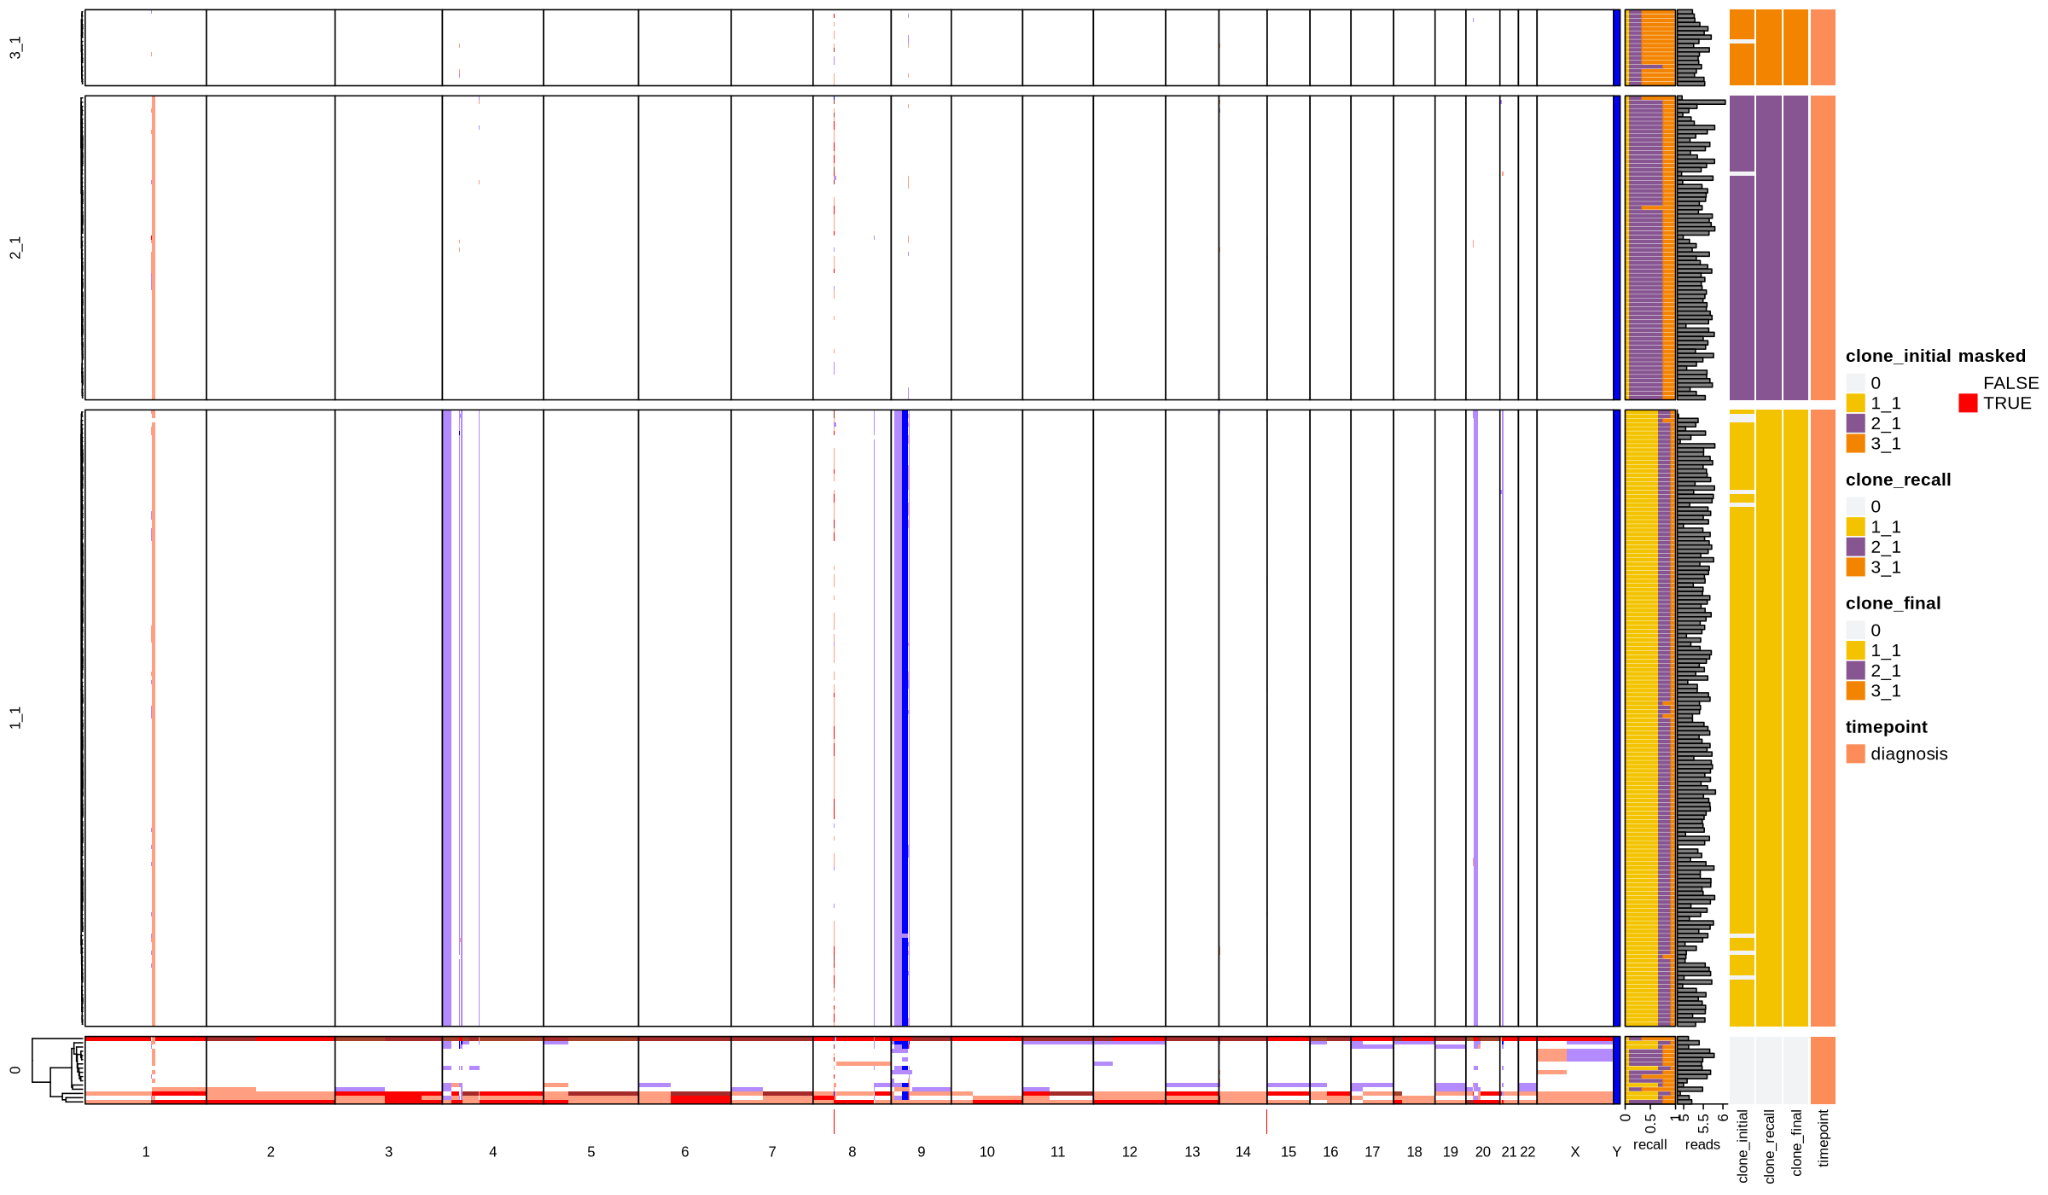


ALL3
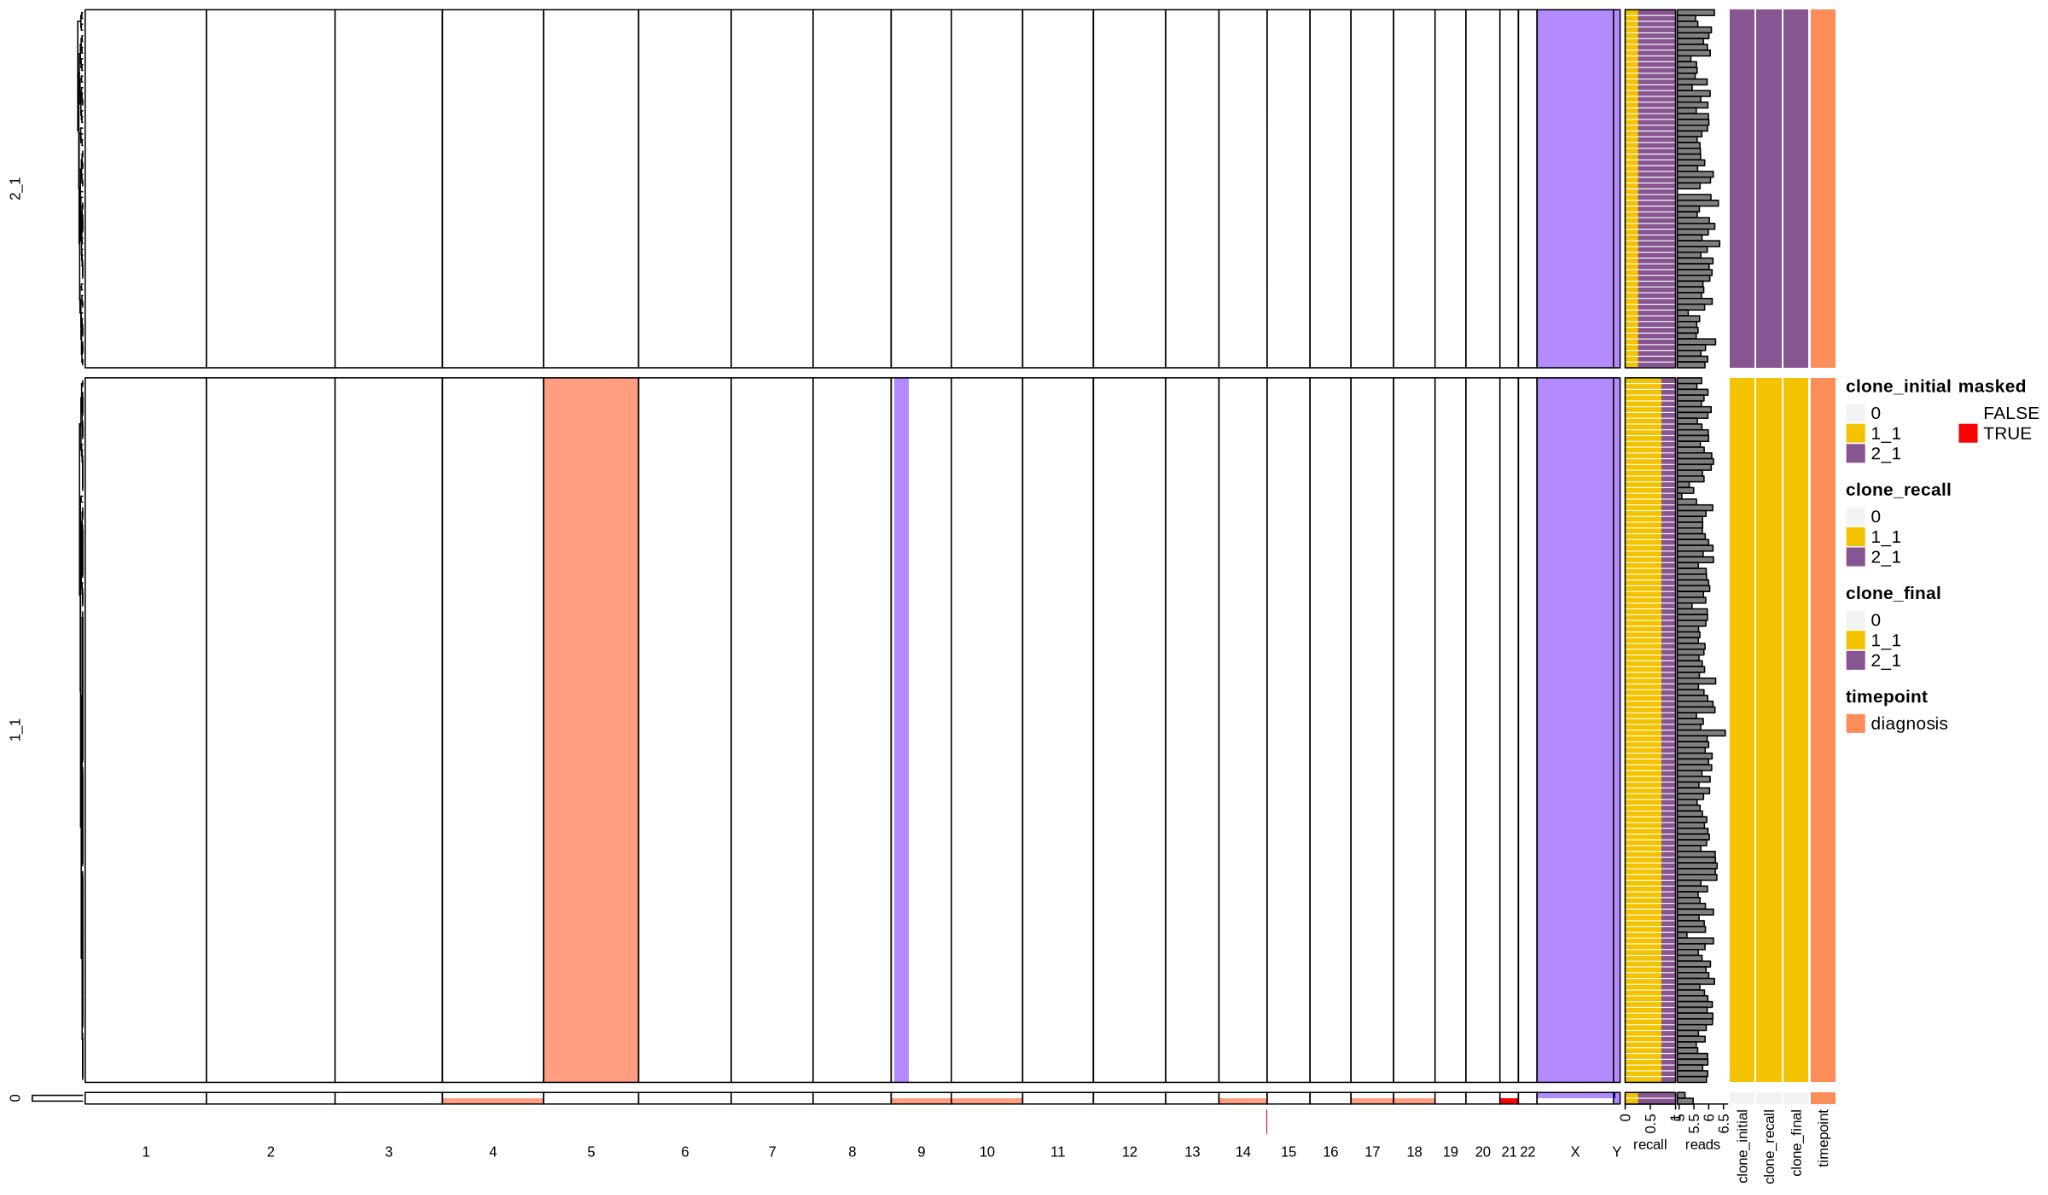


ALL4


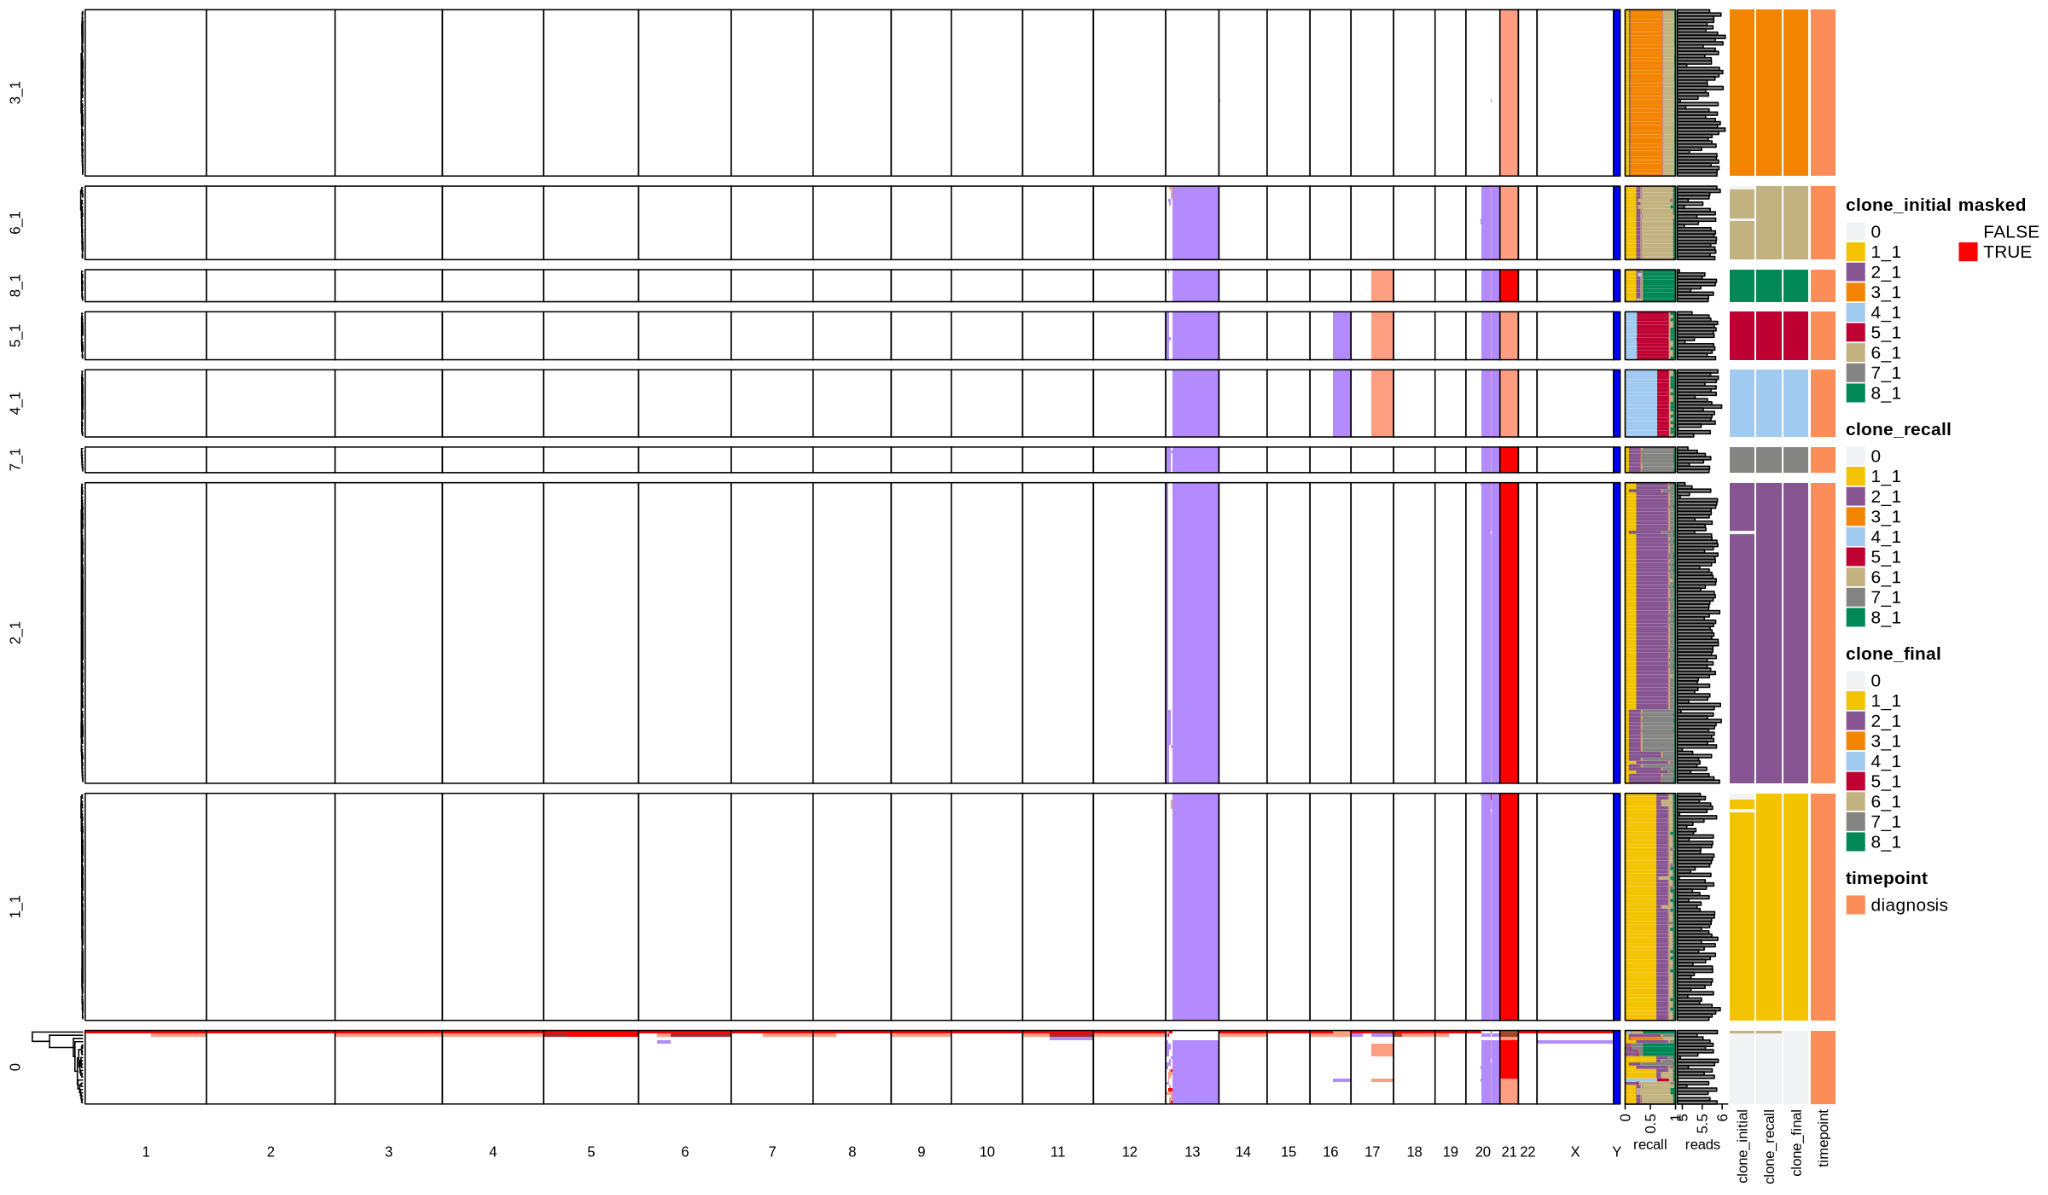


ALL6


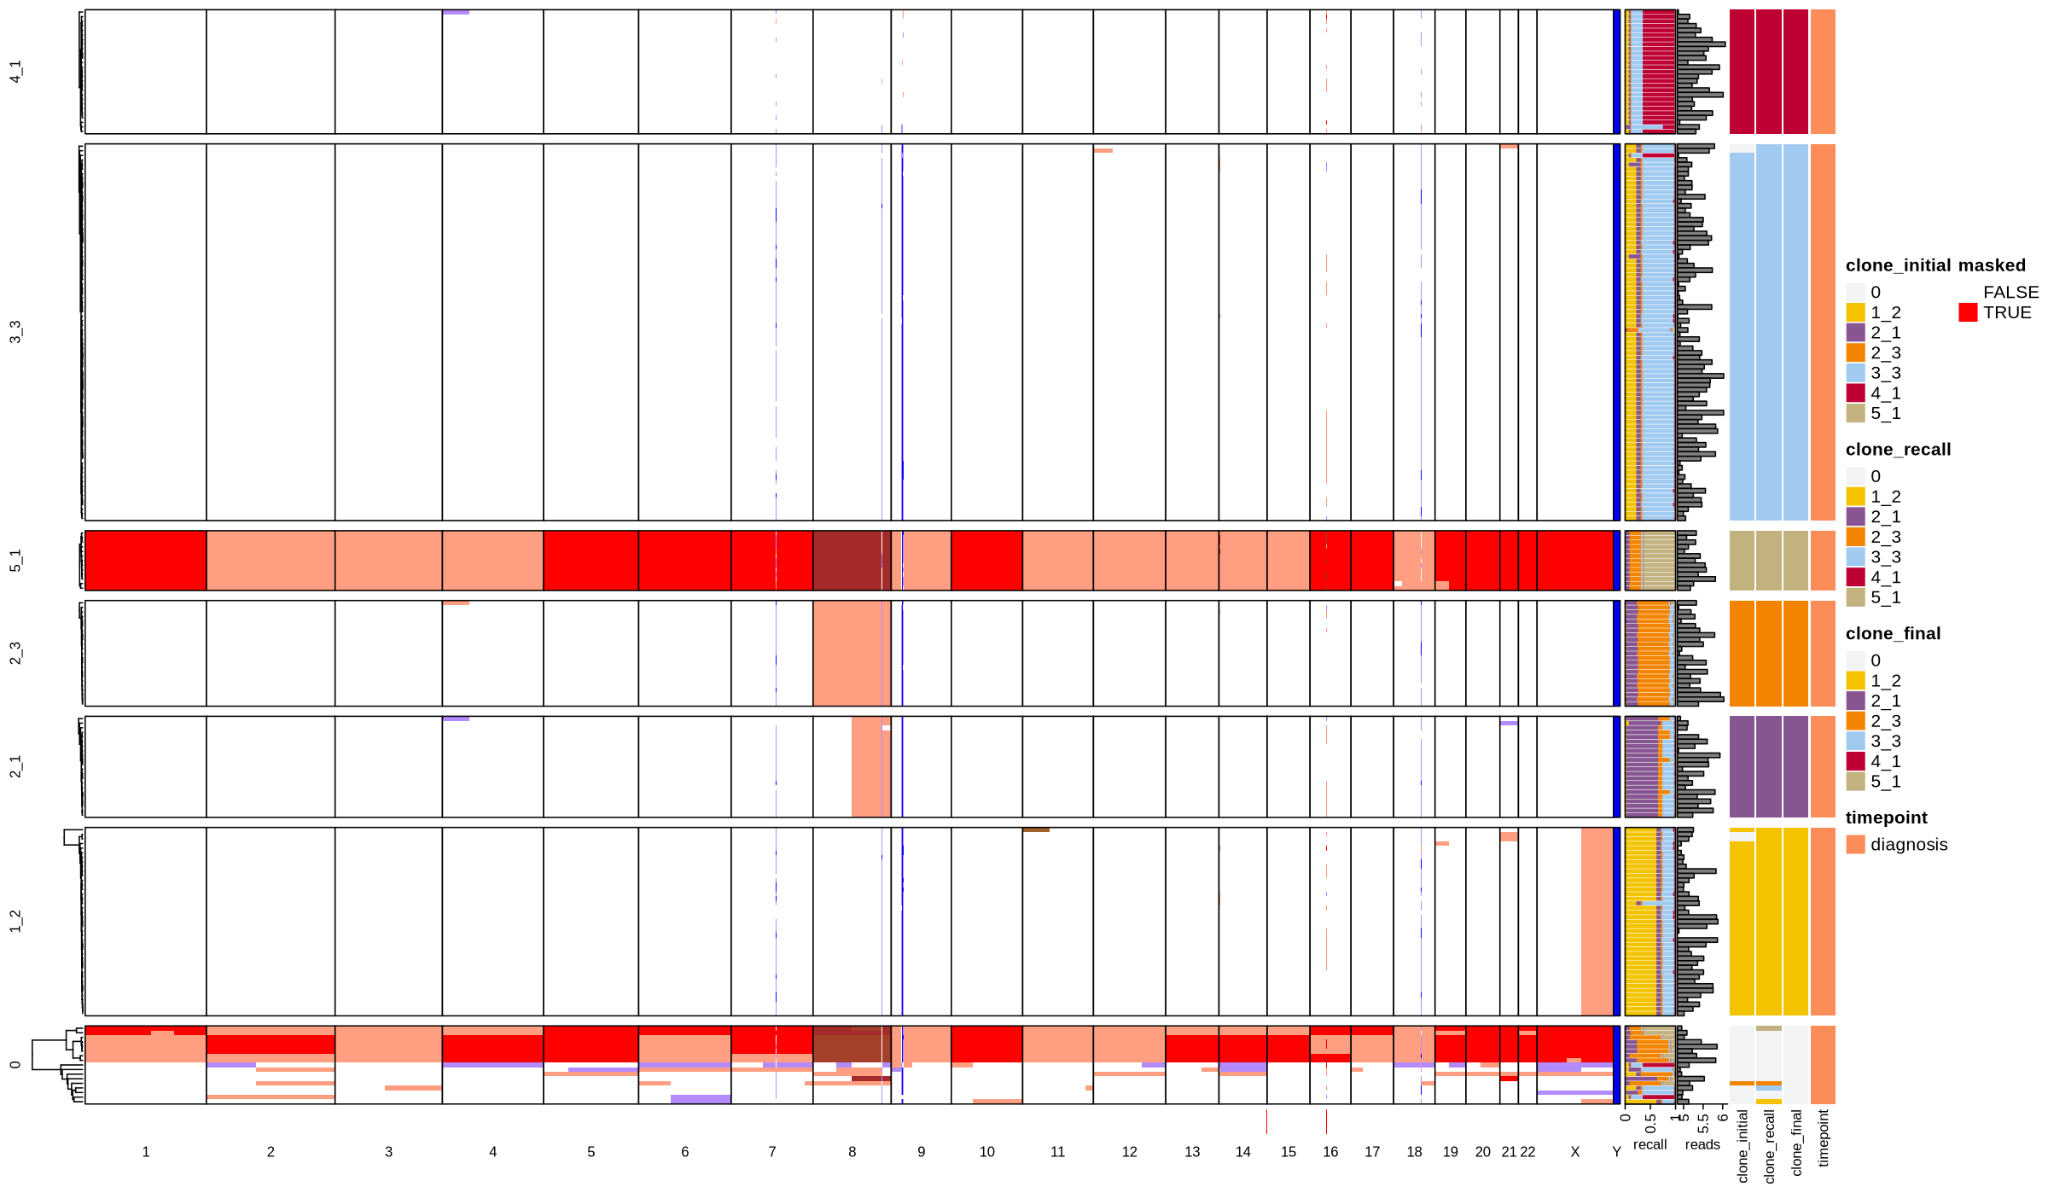


ALL8


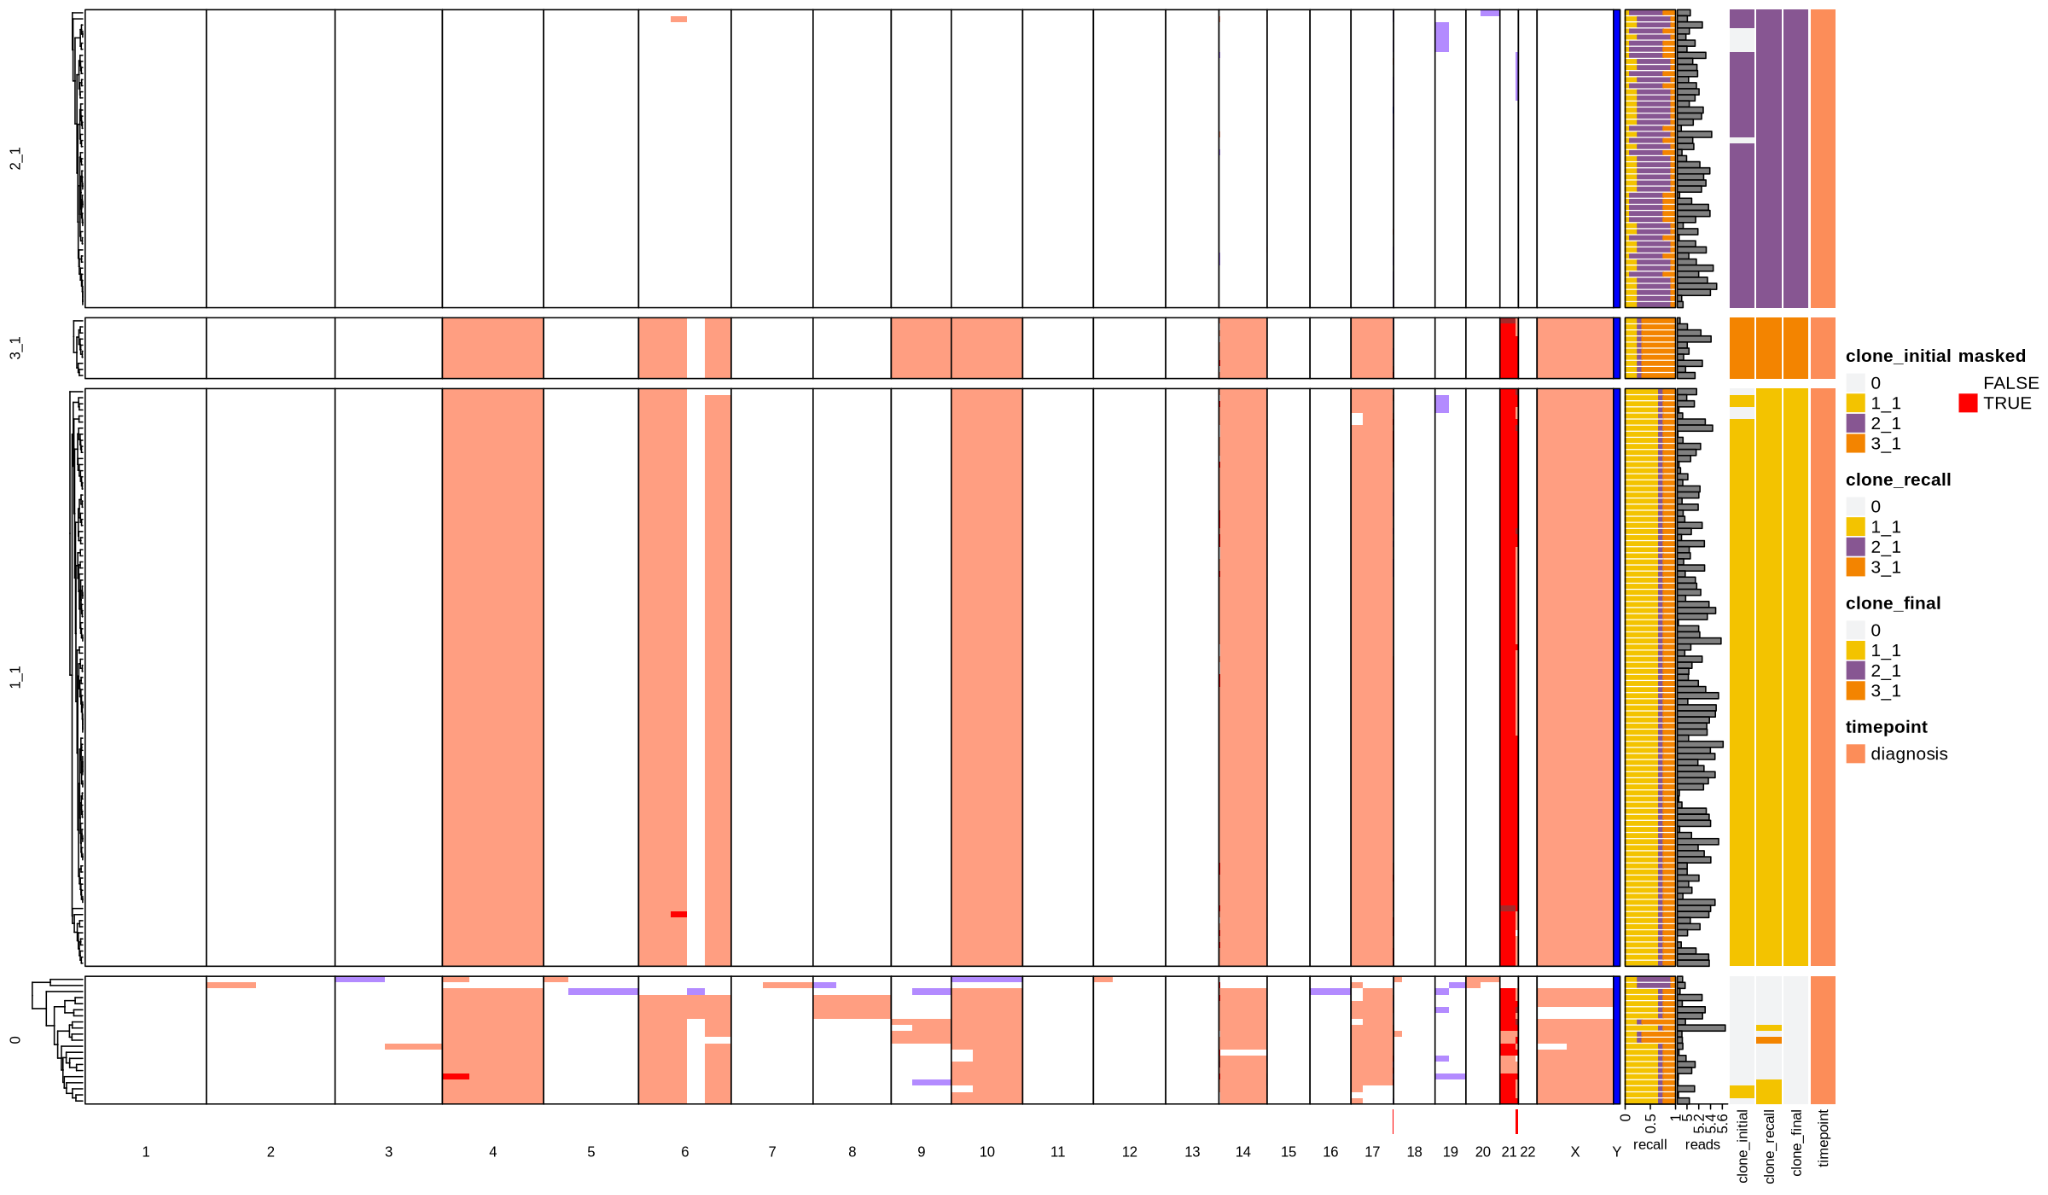


ALL35


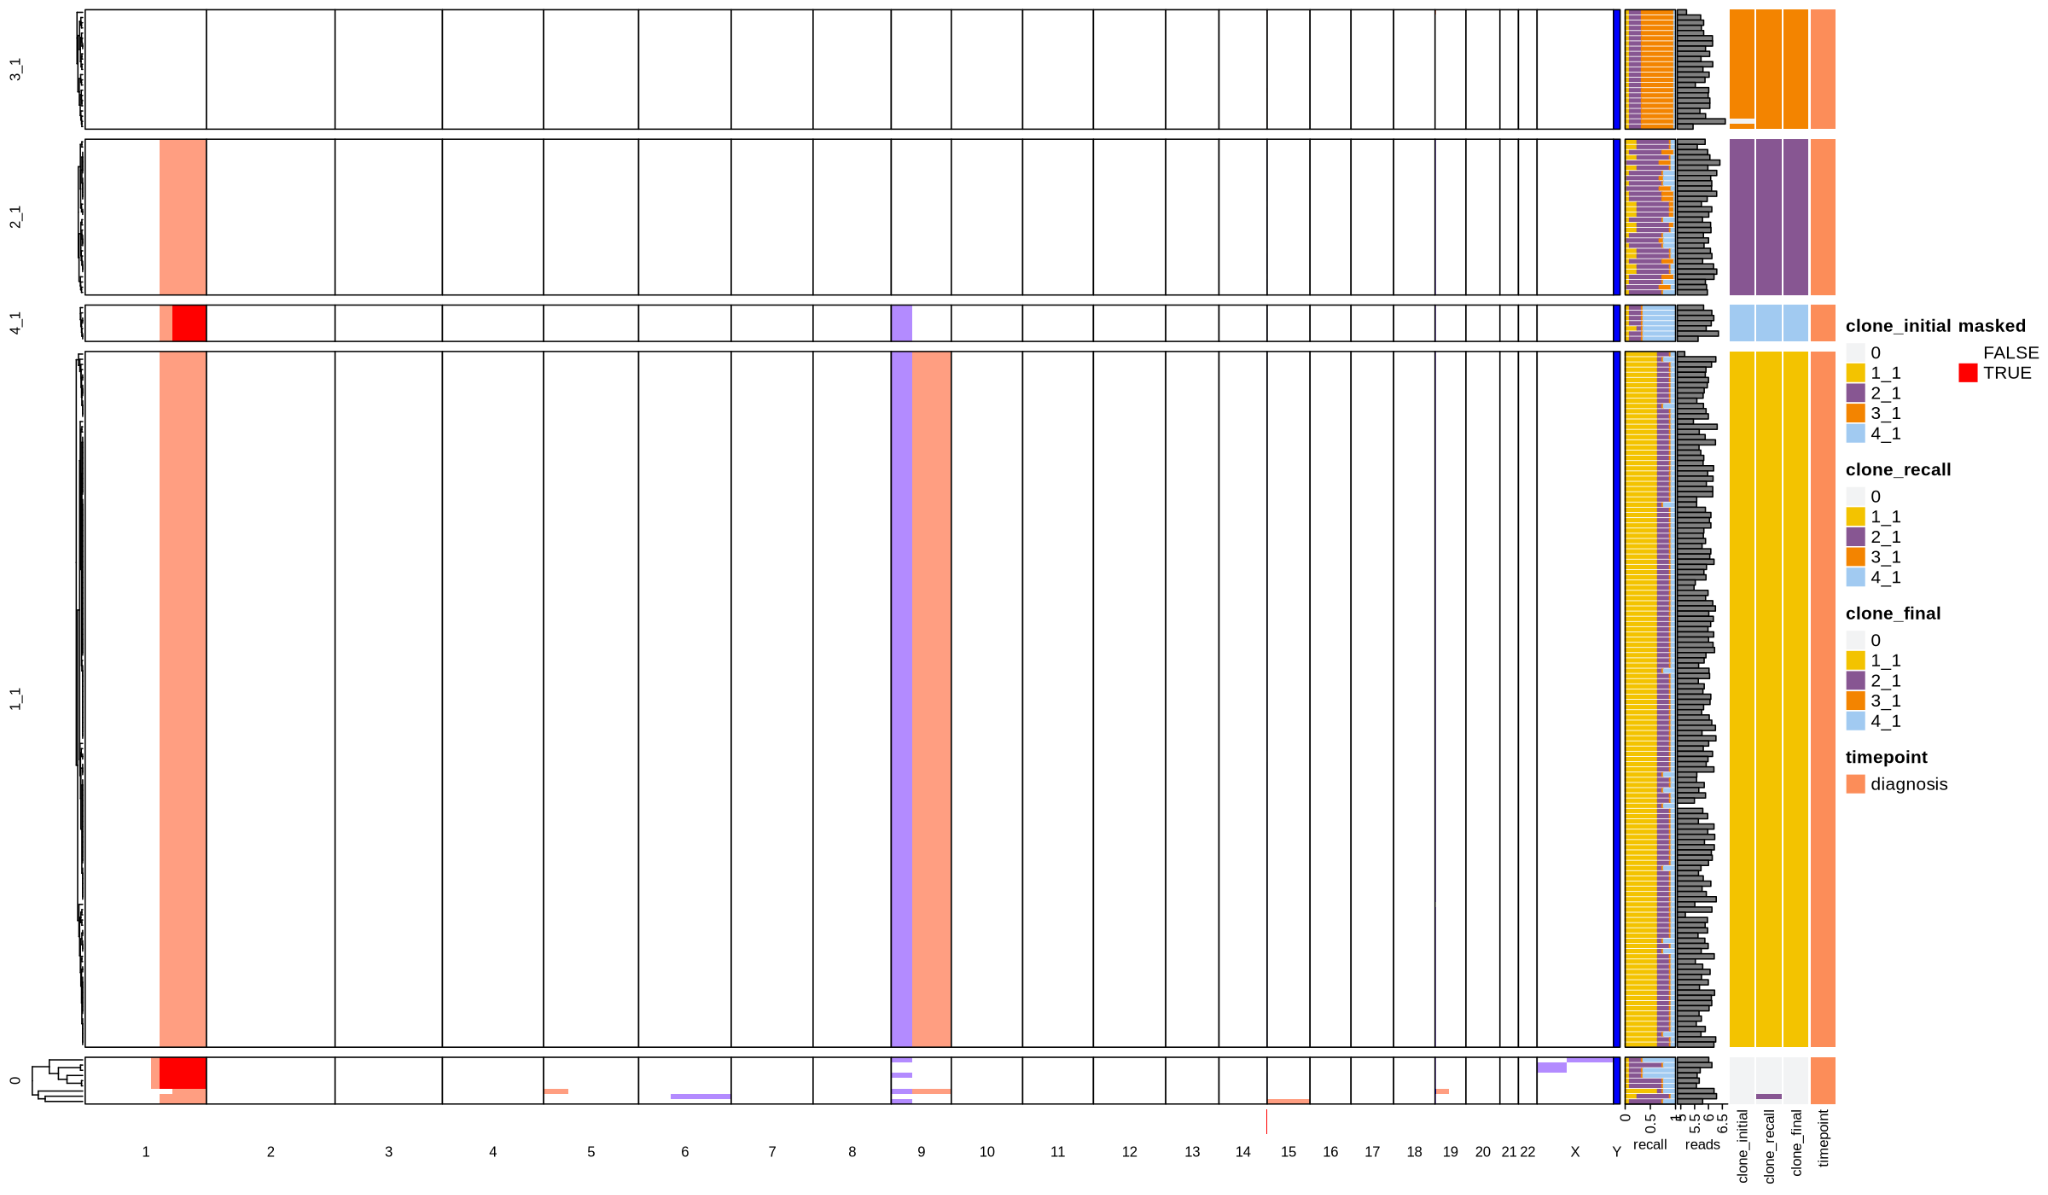


ALL40


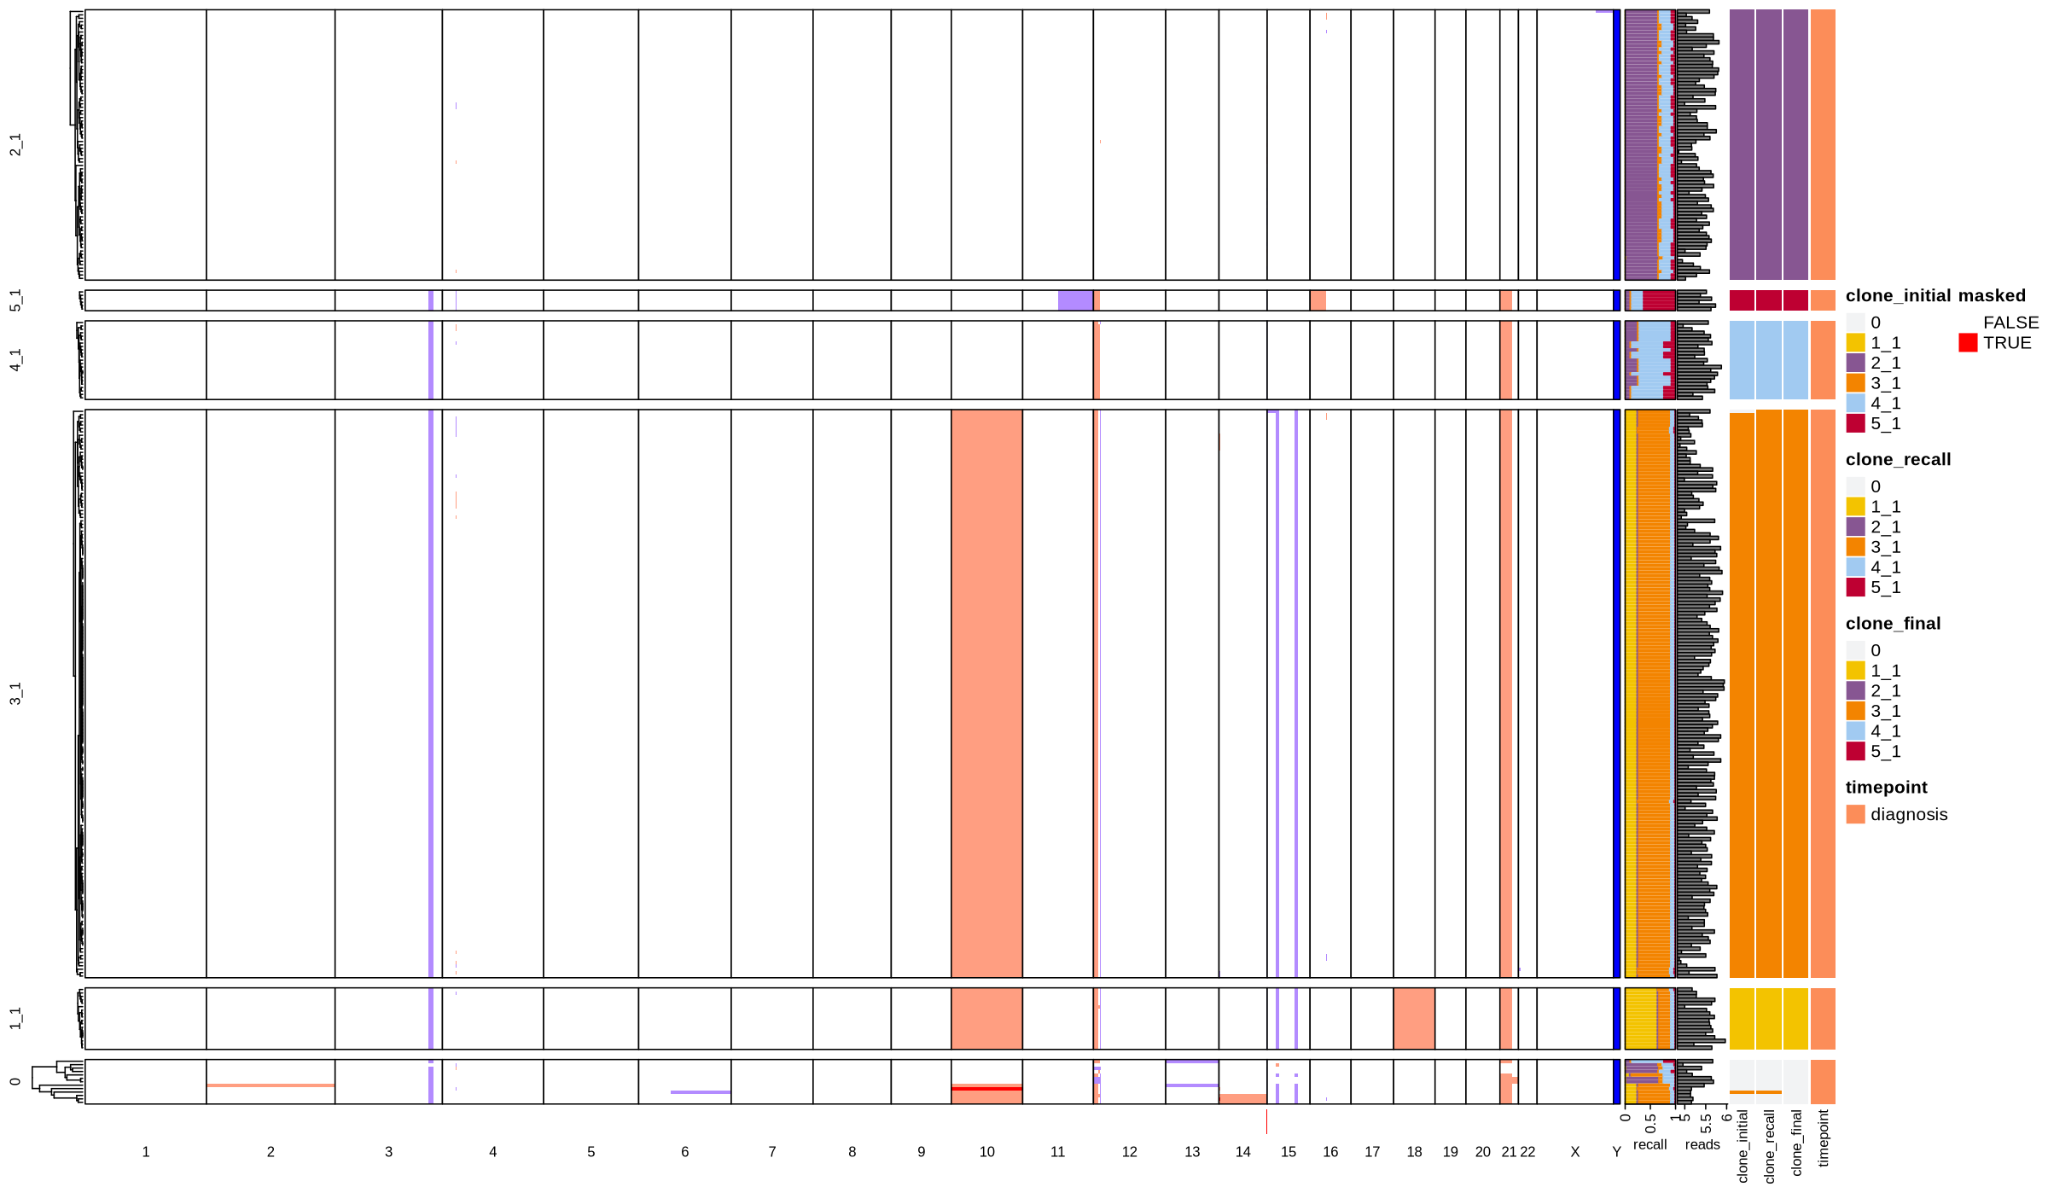


ALL42


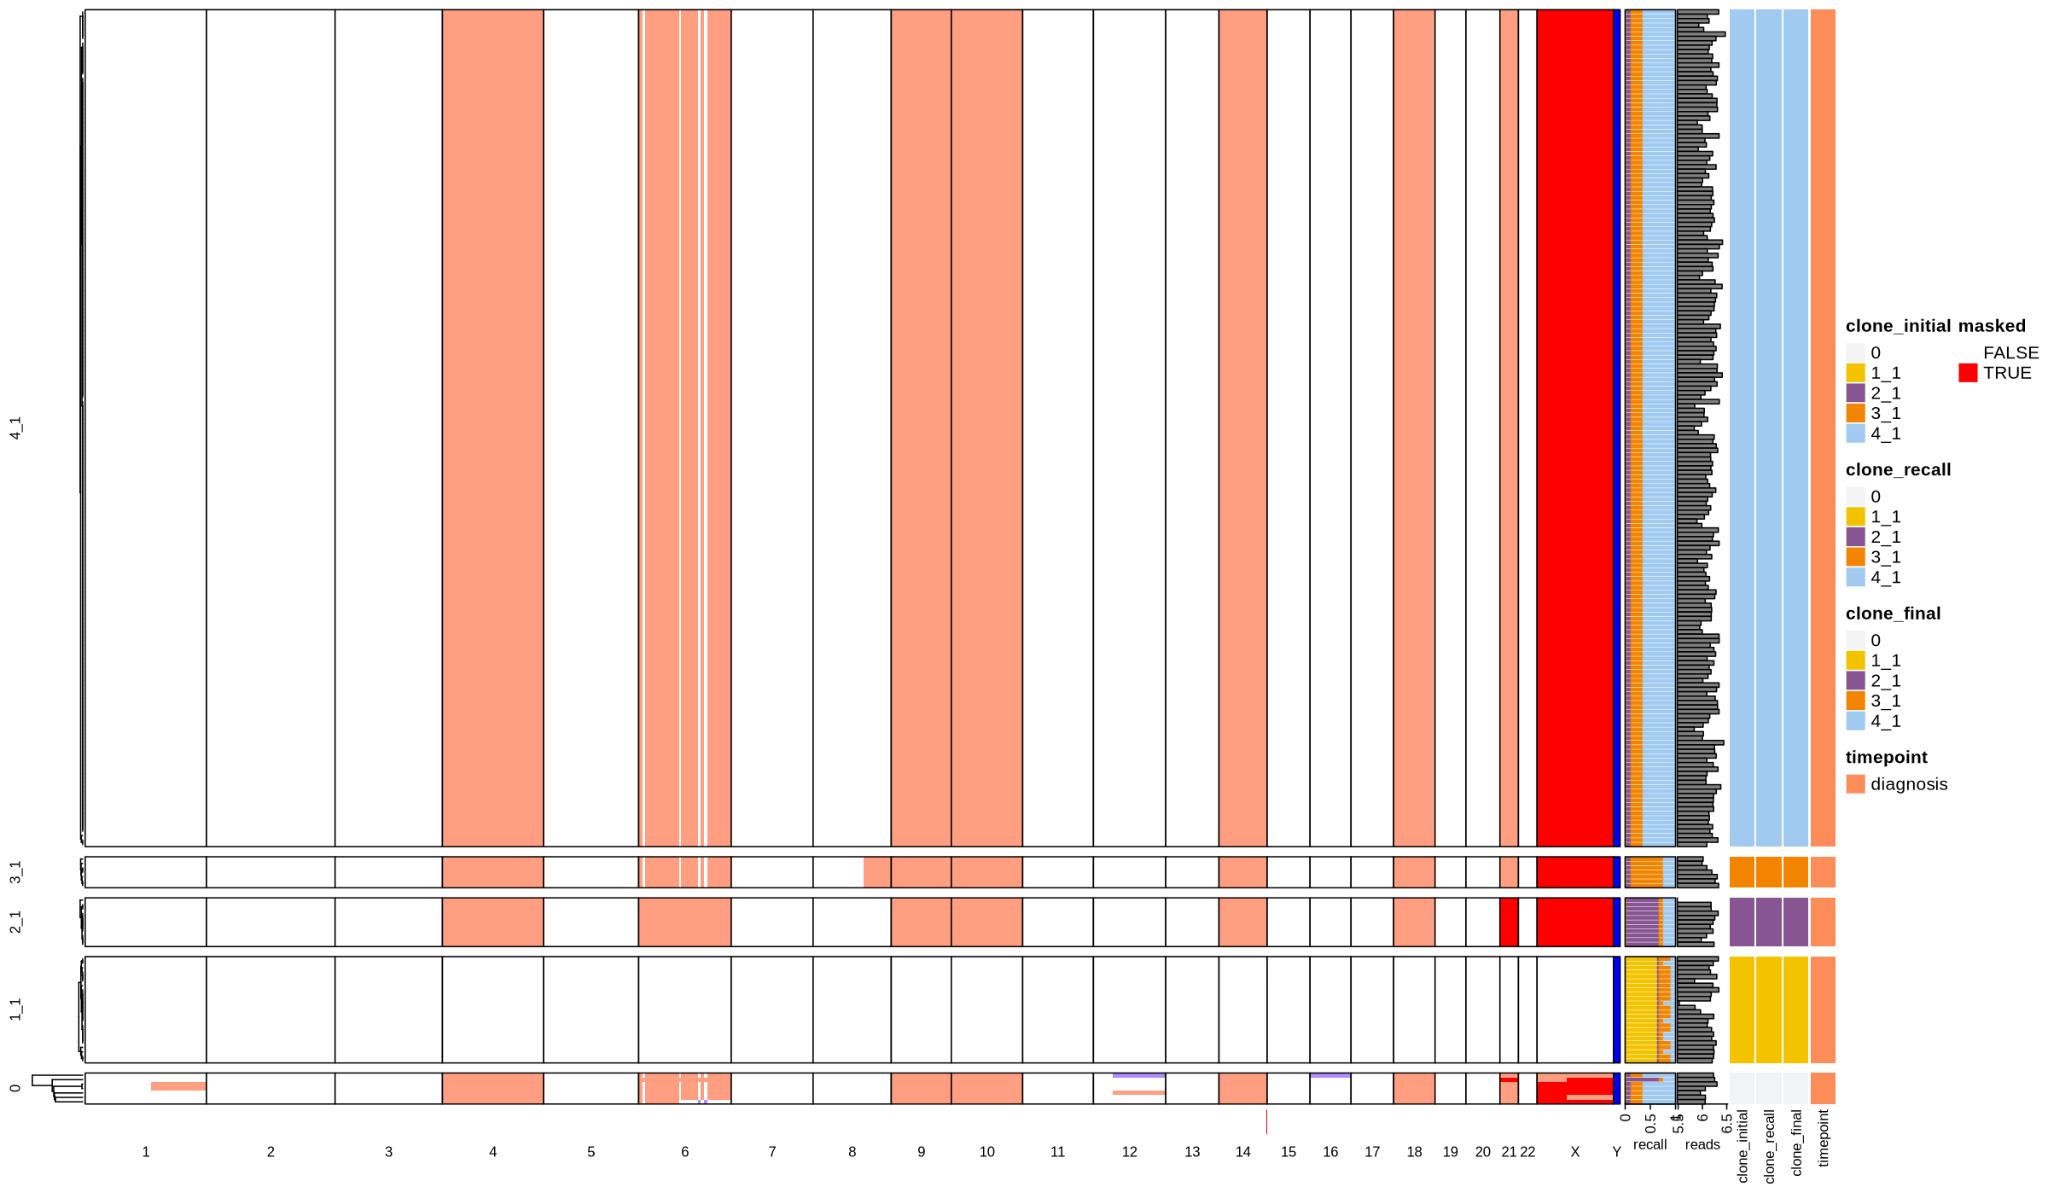


ALL47


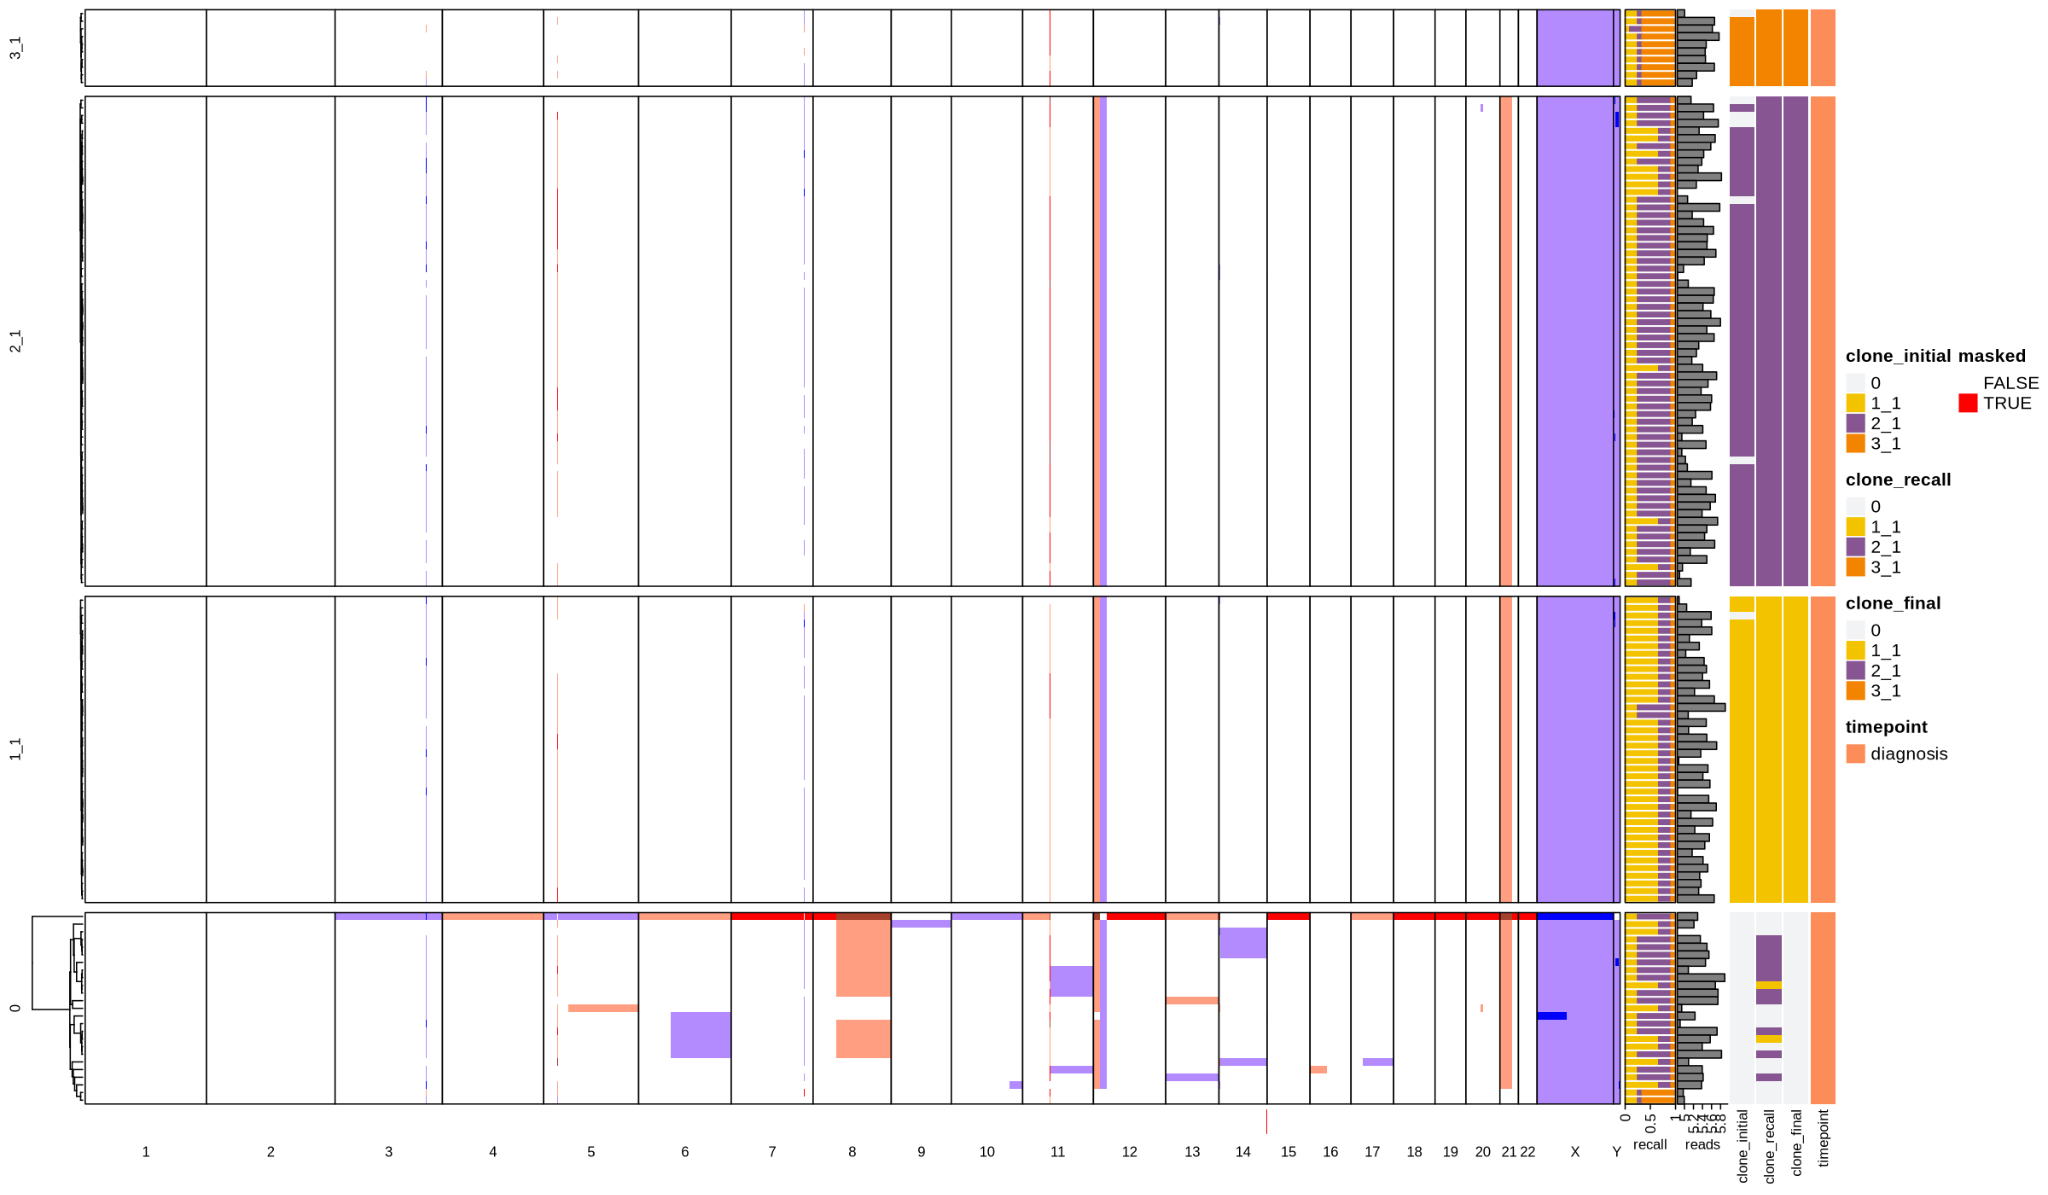


ALL64


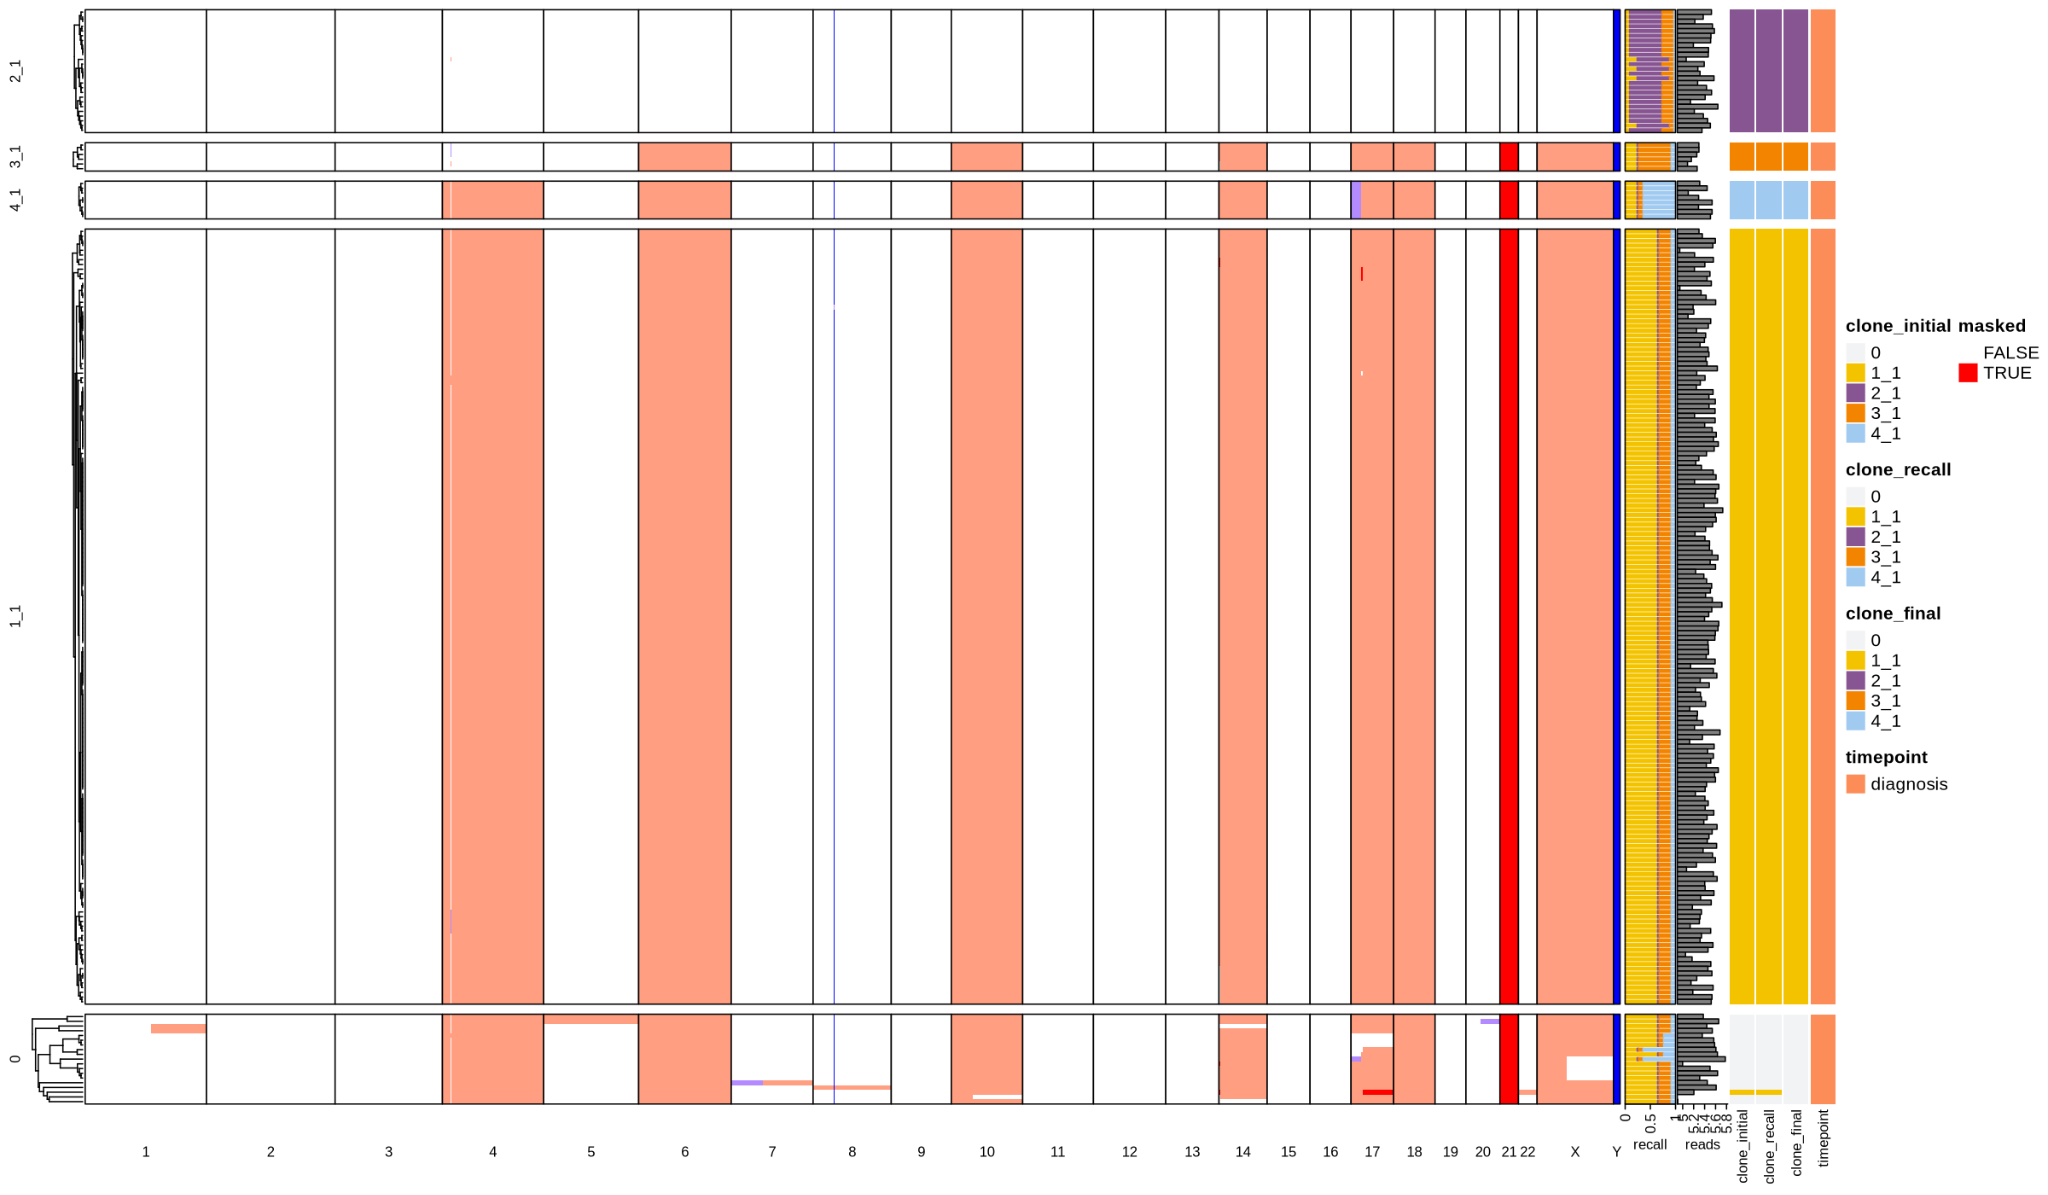


ALL66


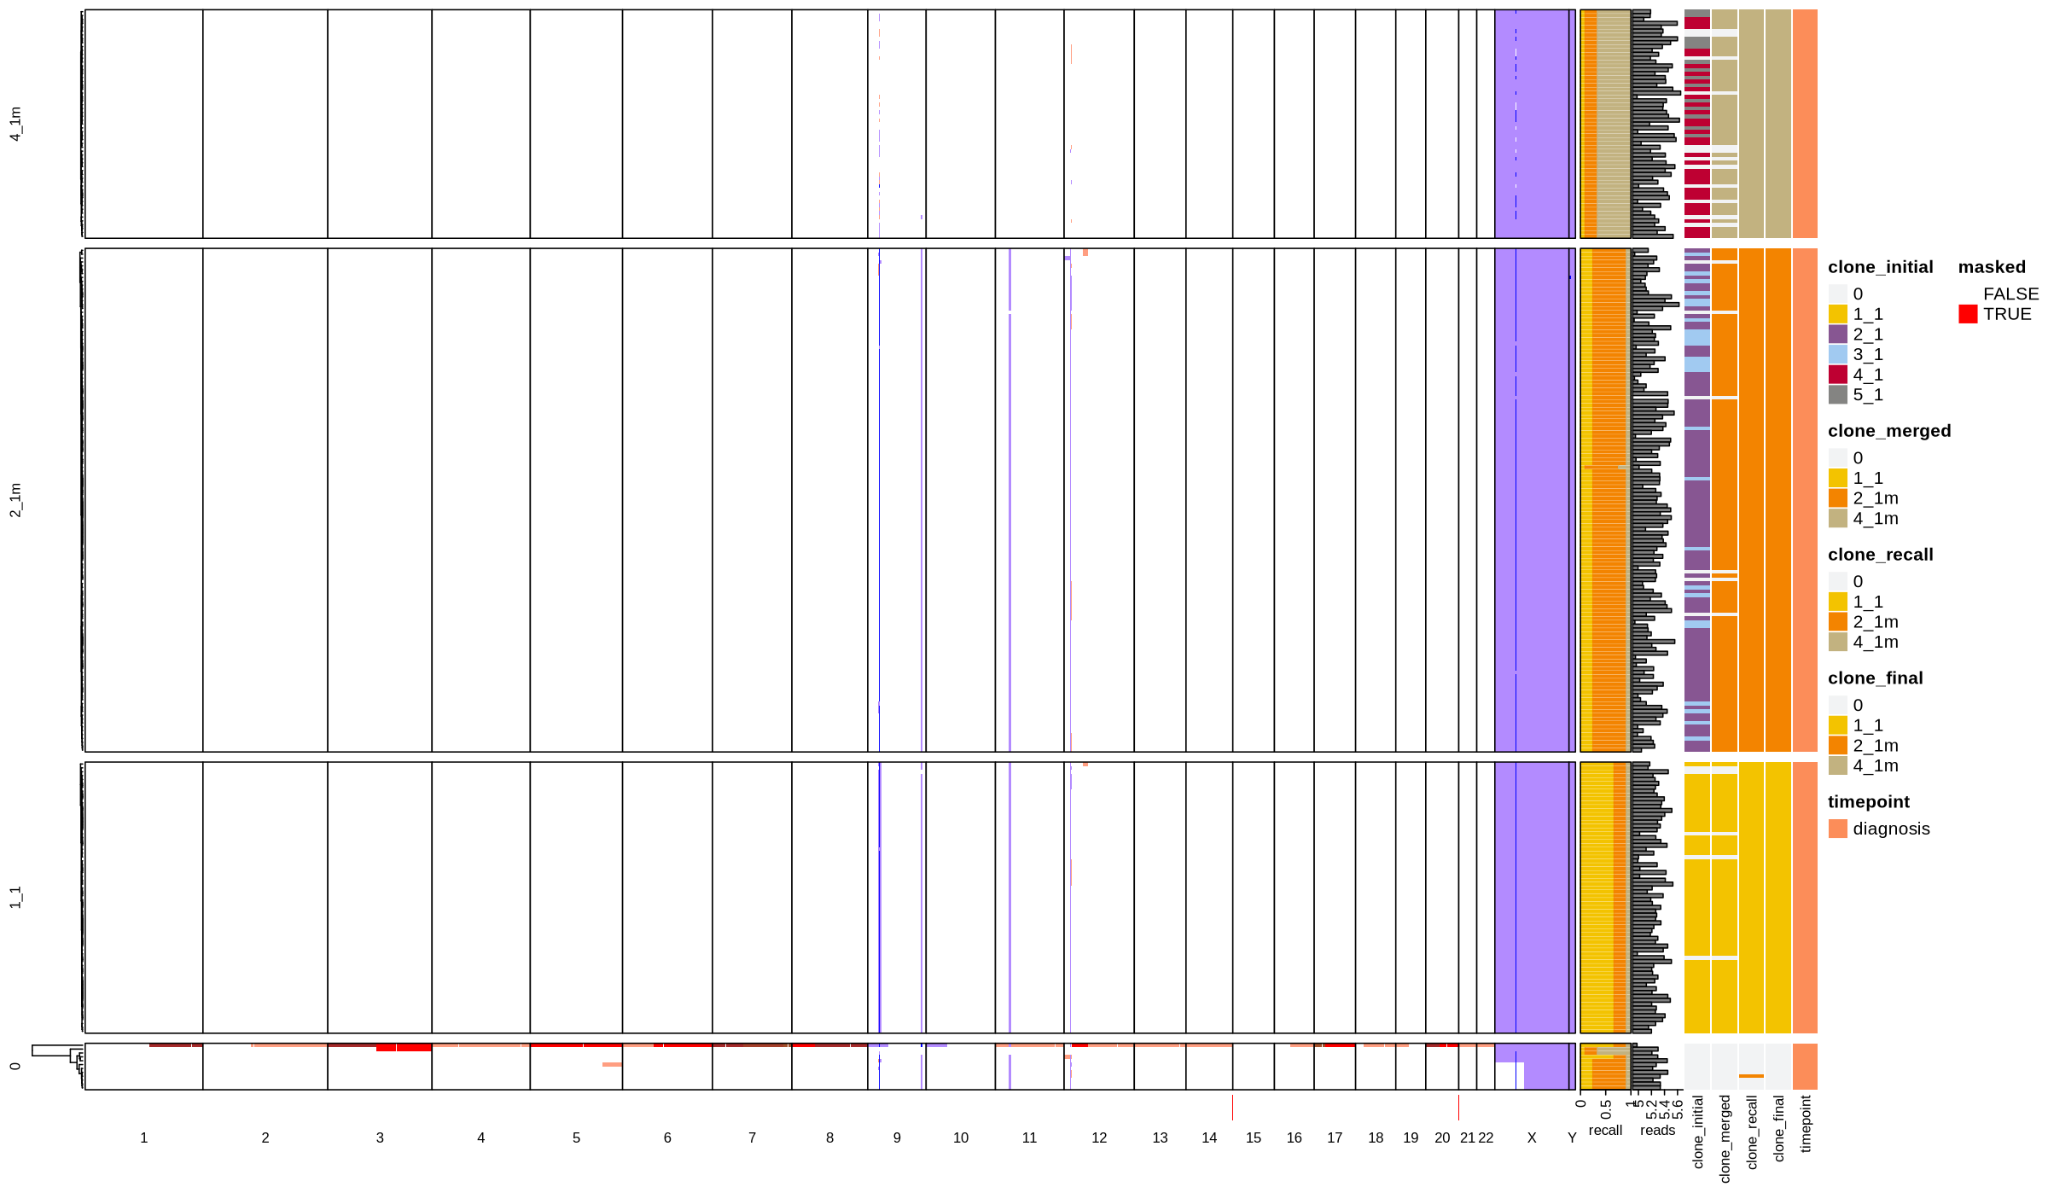


ALL67


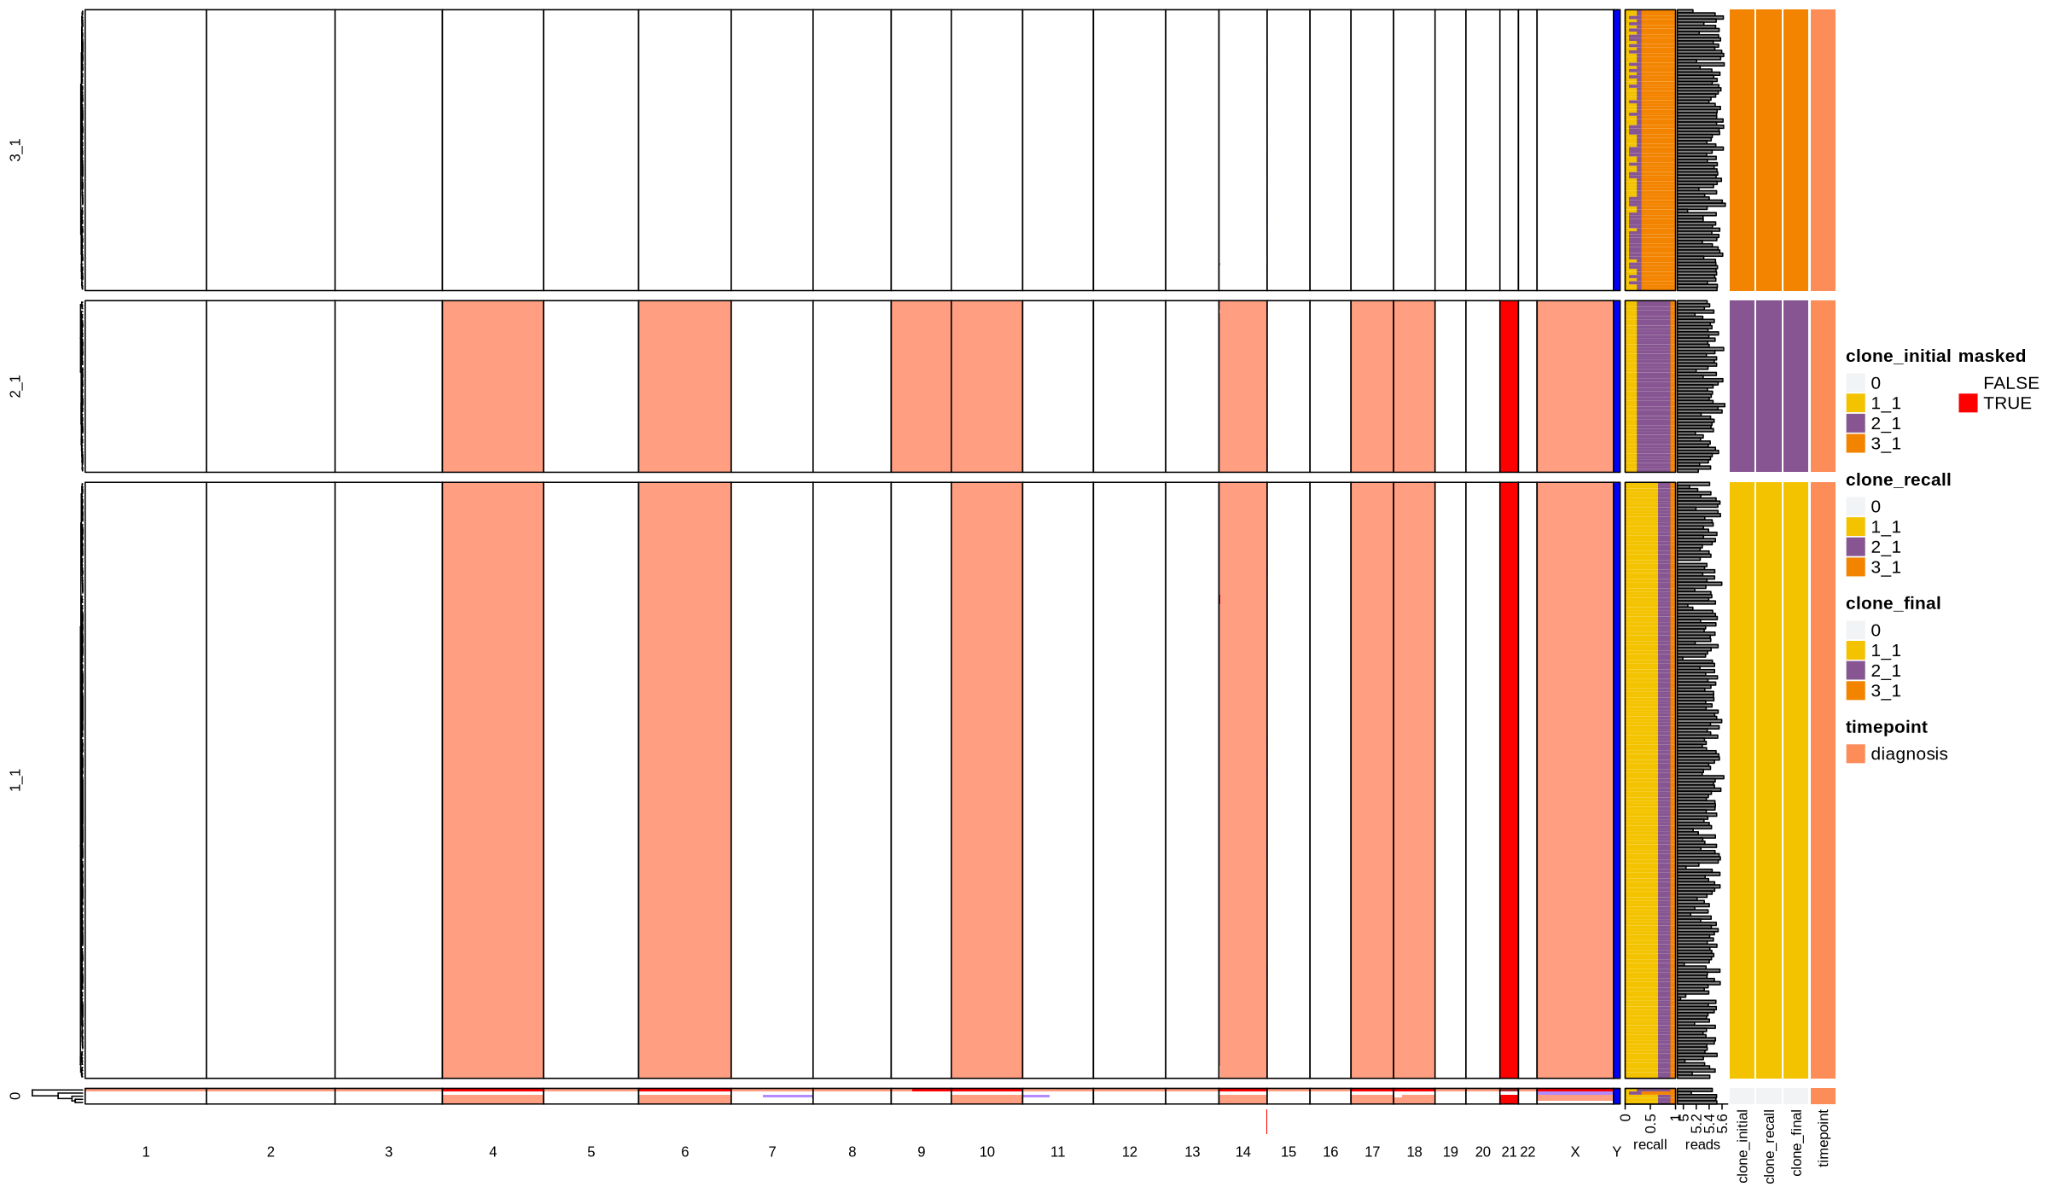


ALL68


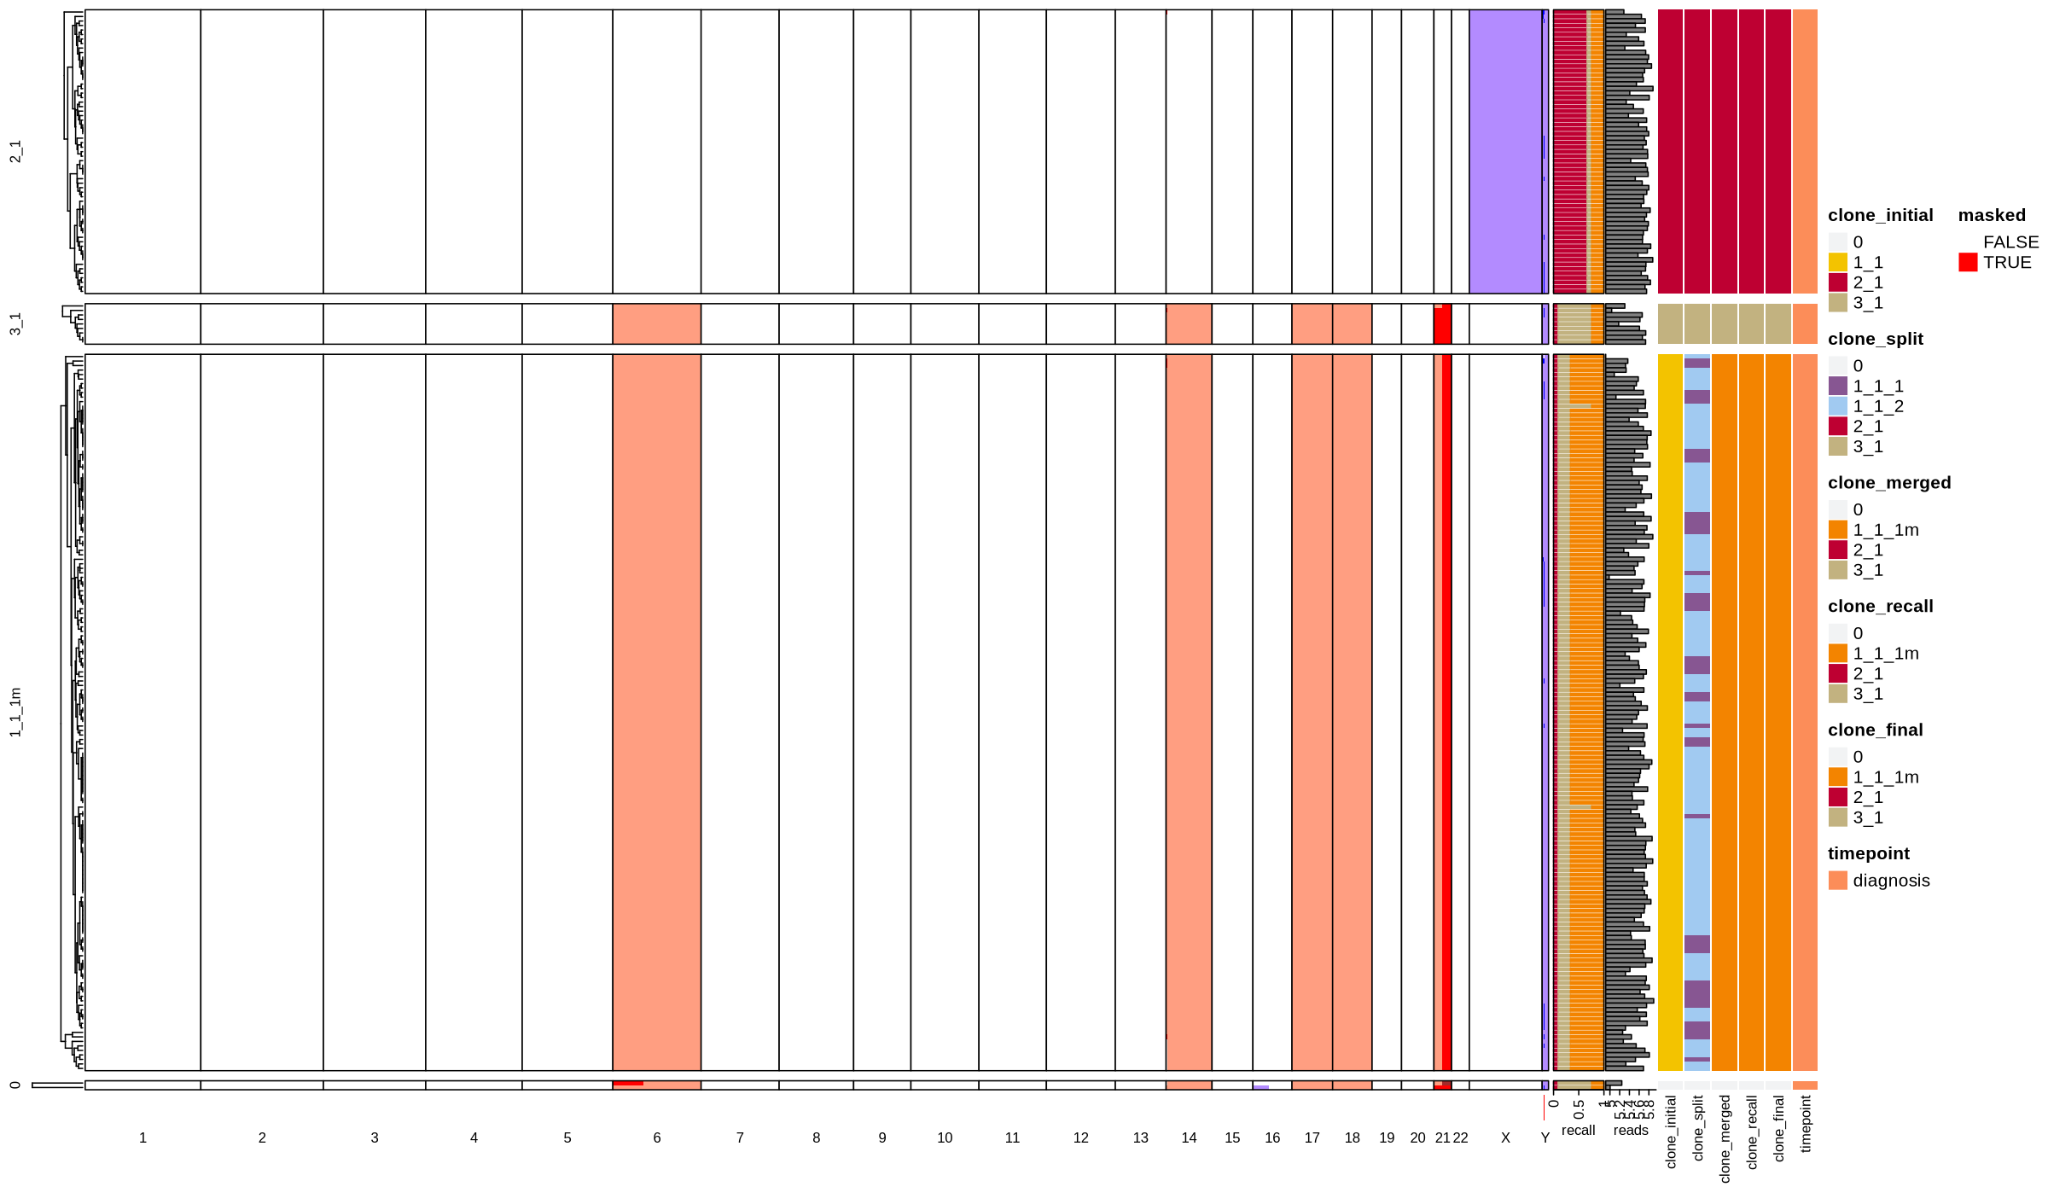


ALL71


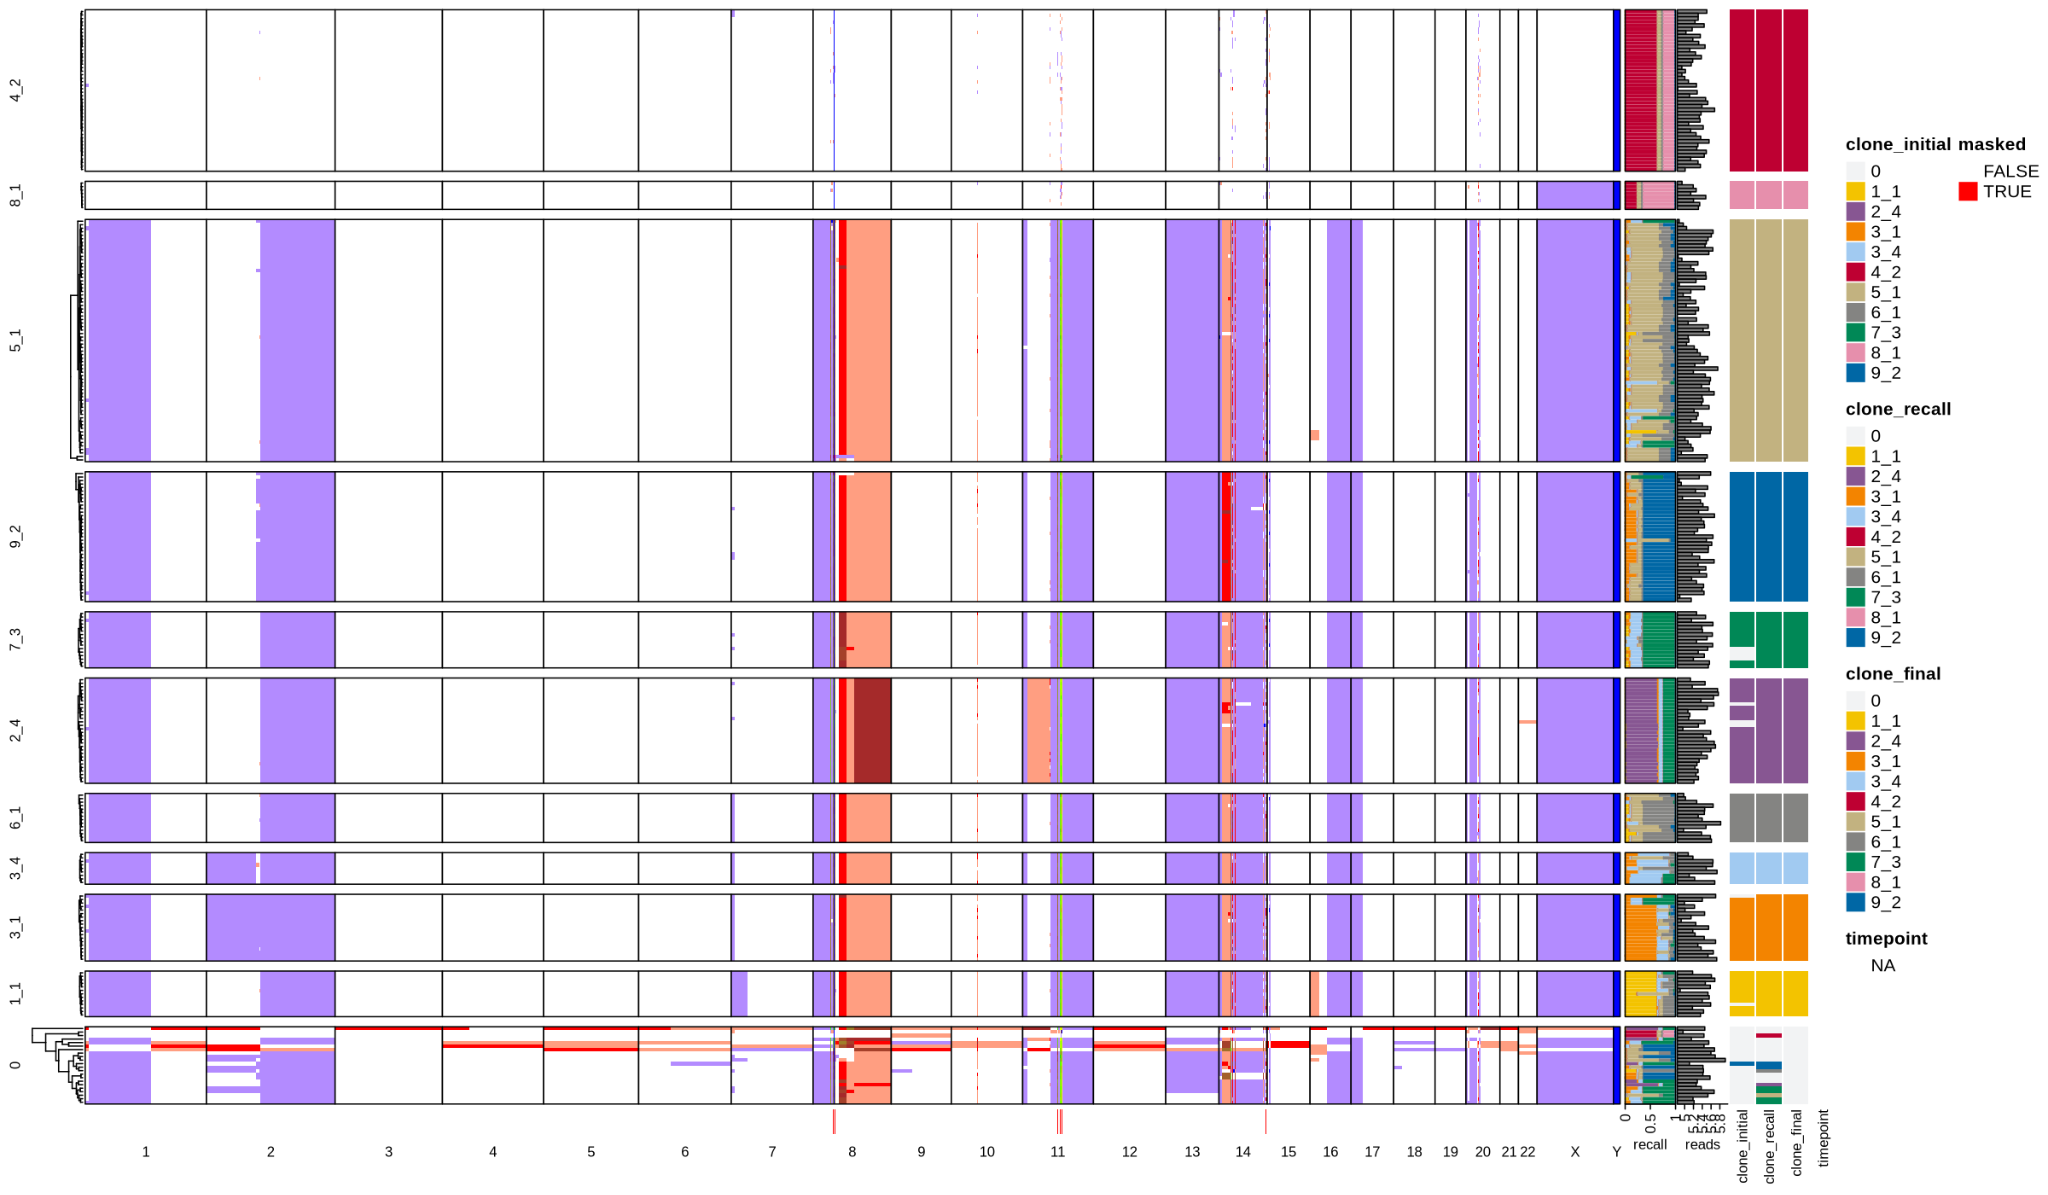


BC4


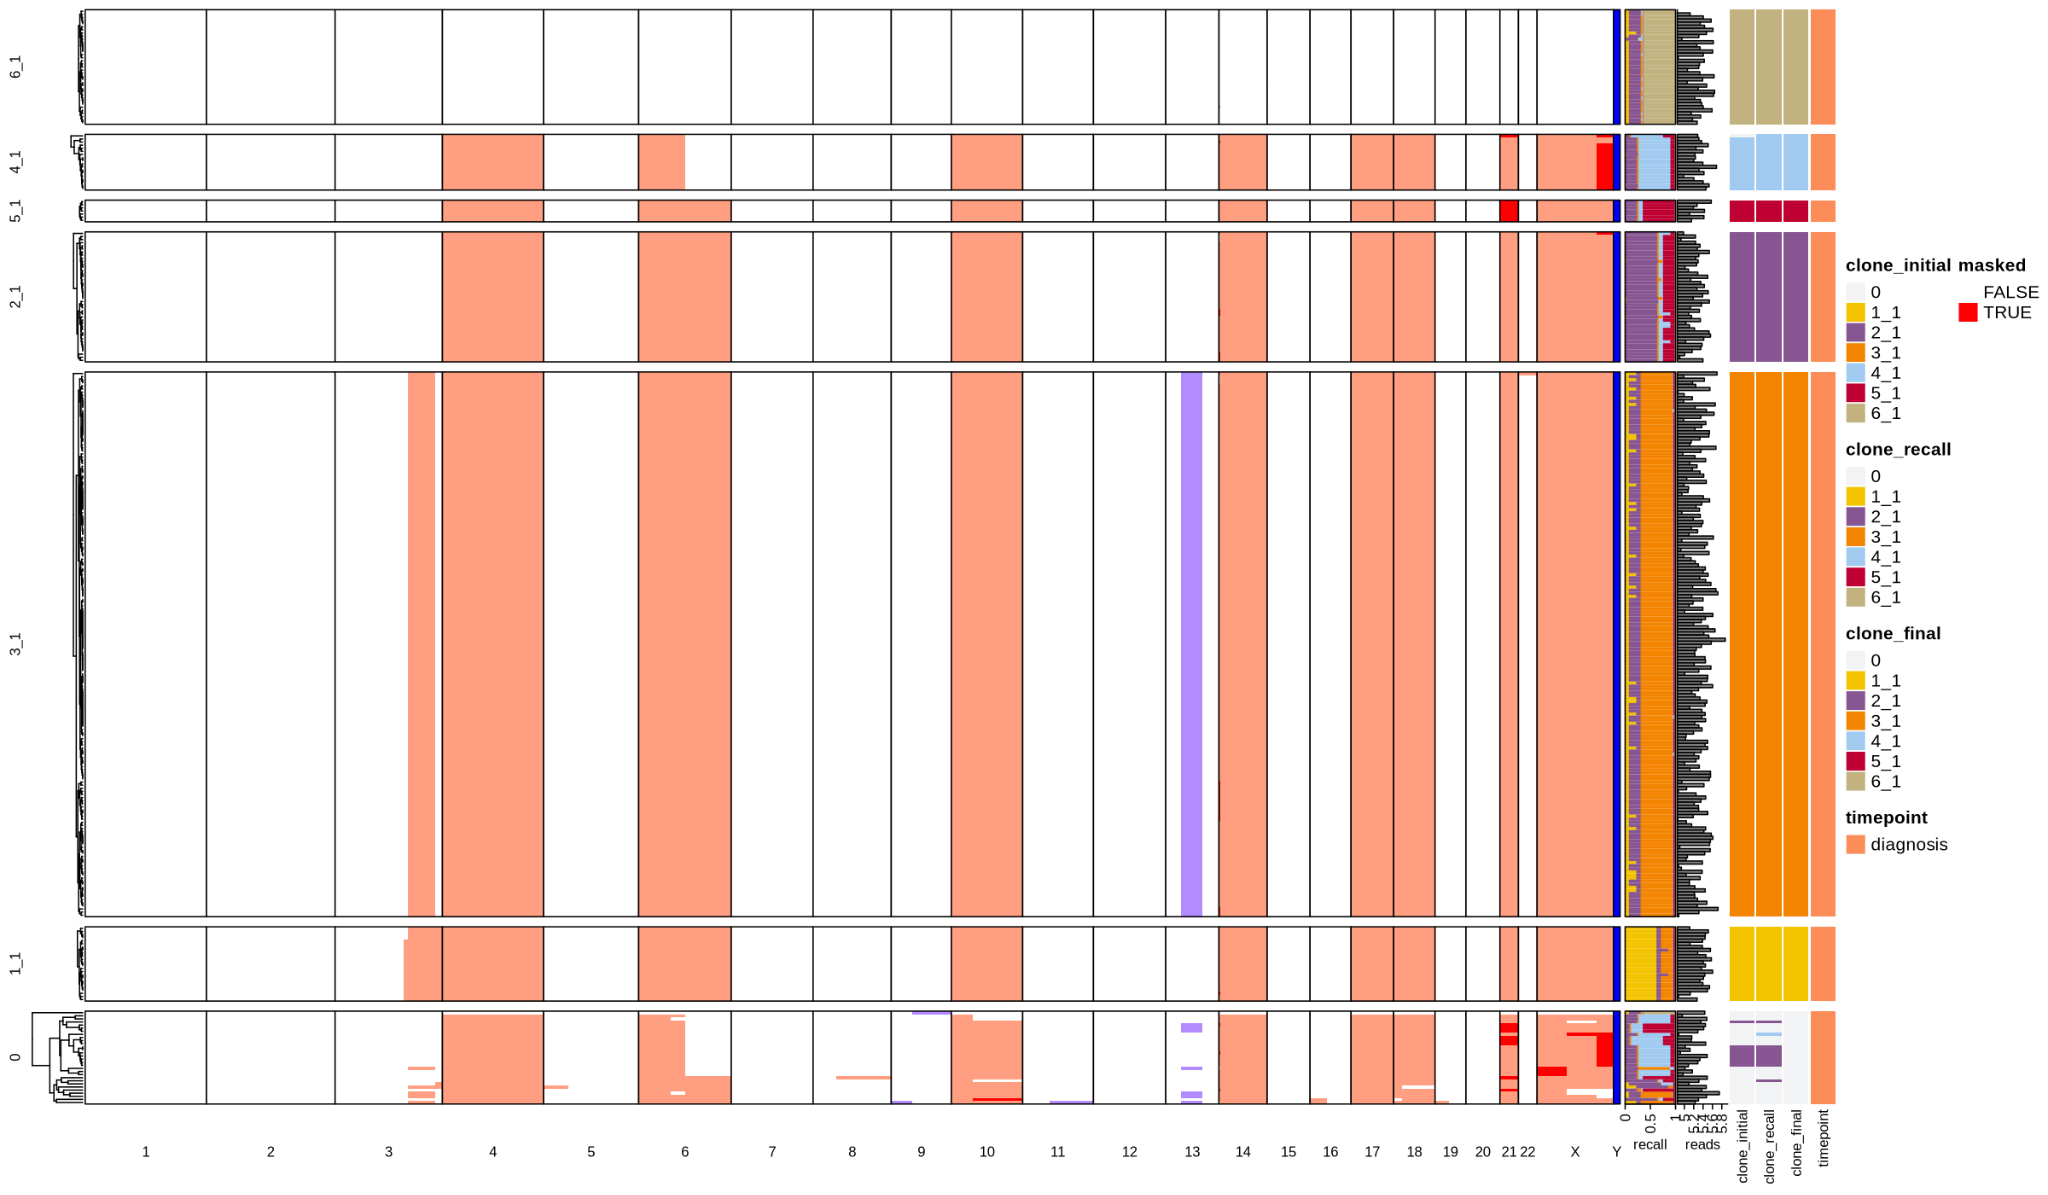


MEL5


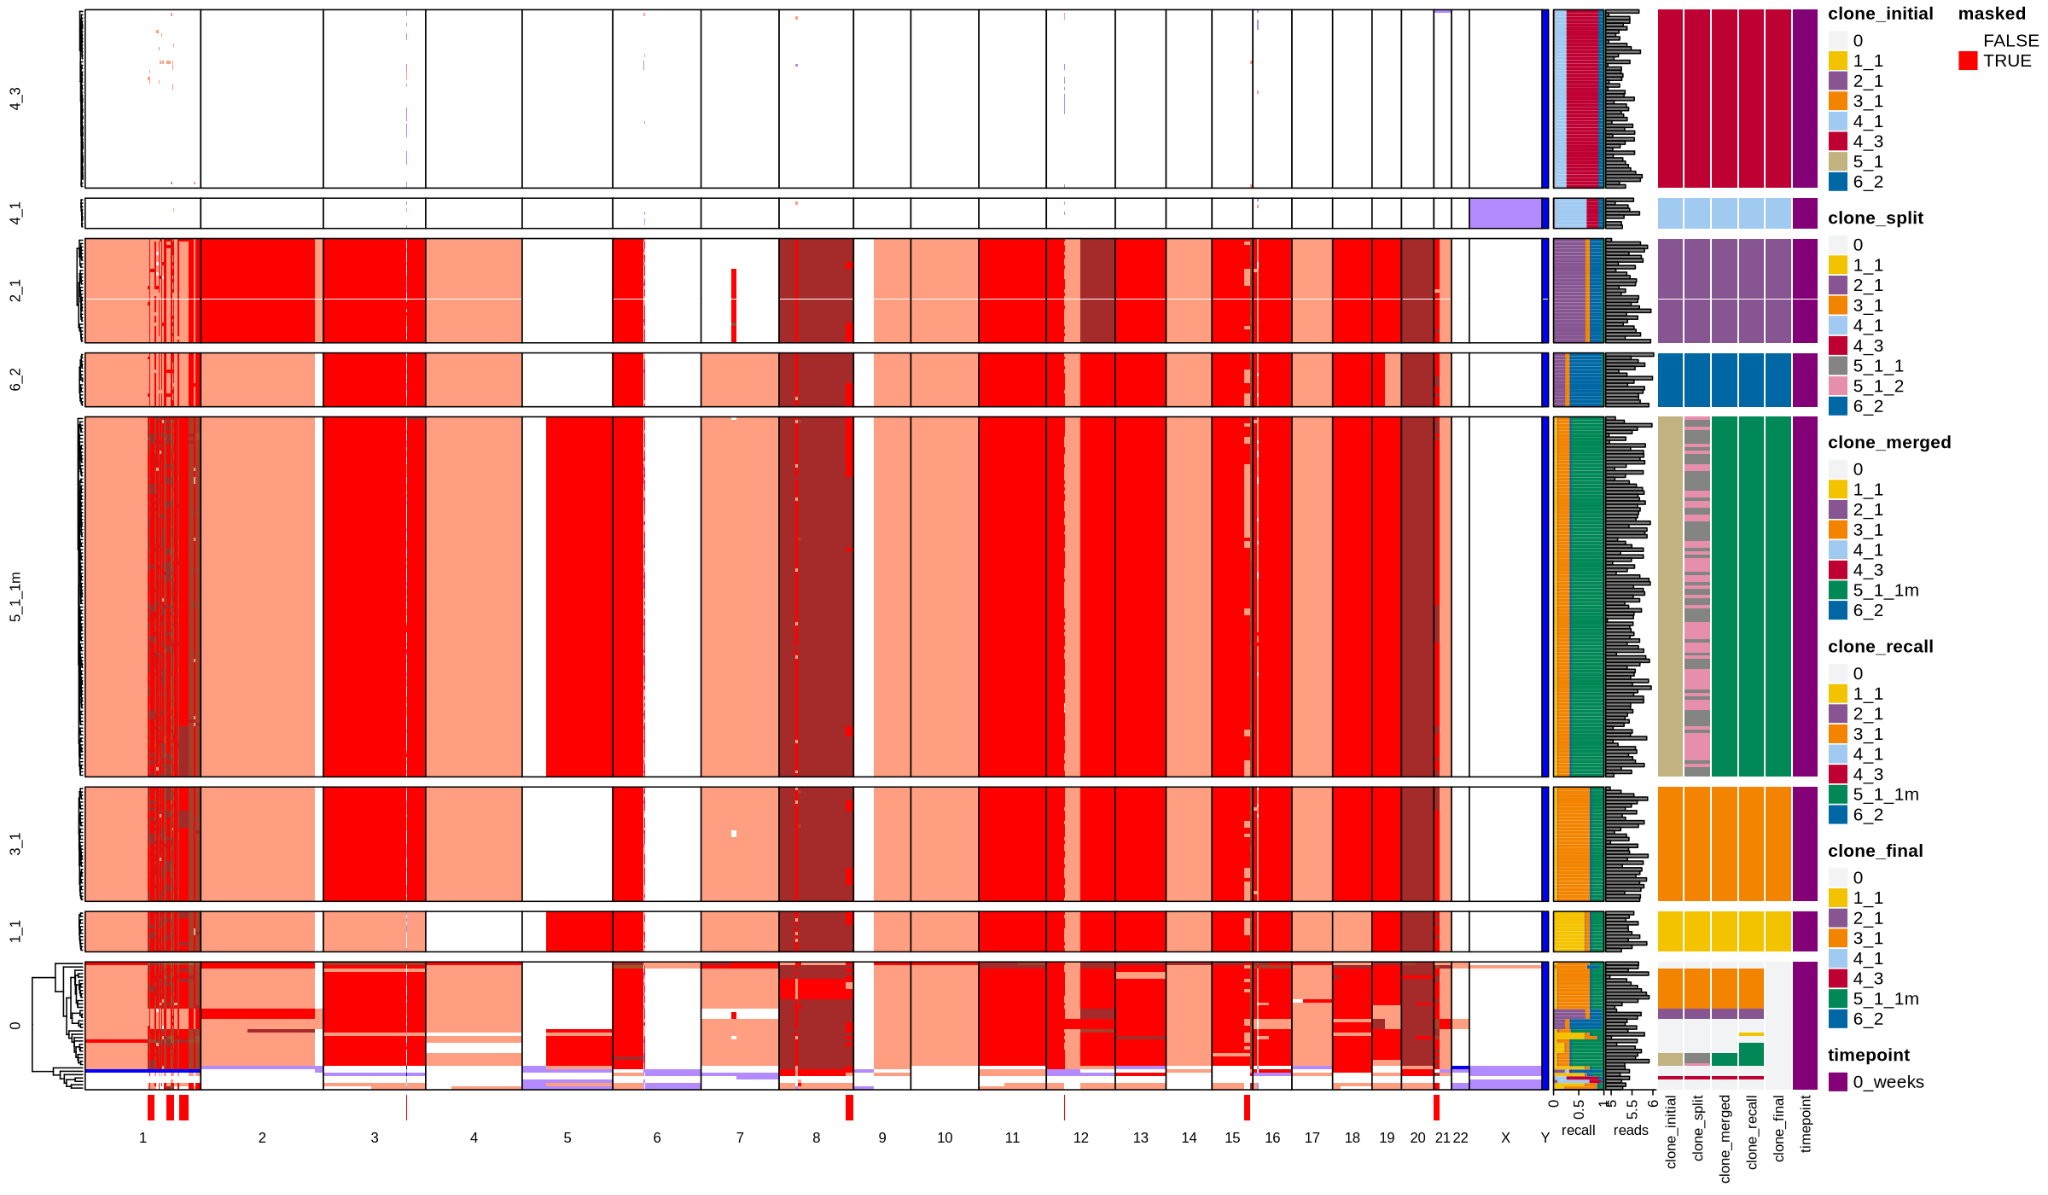


MEL6


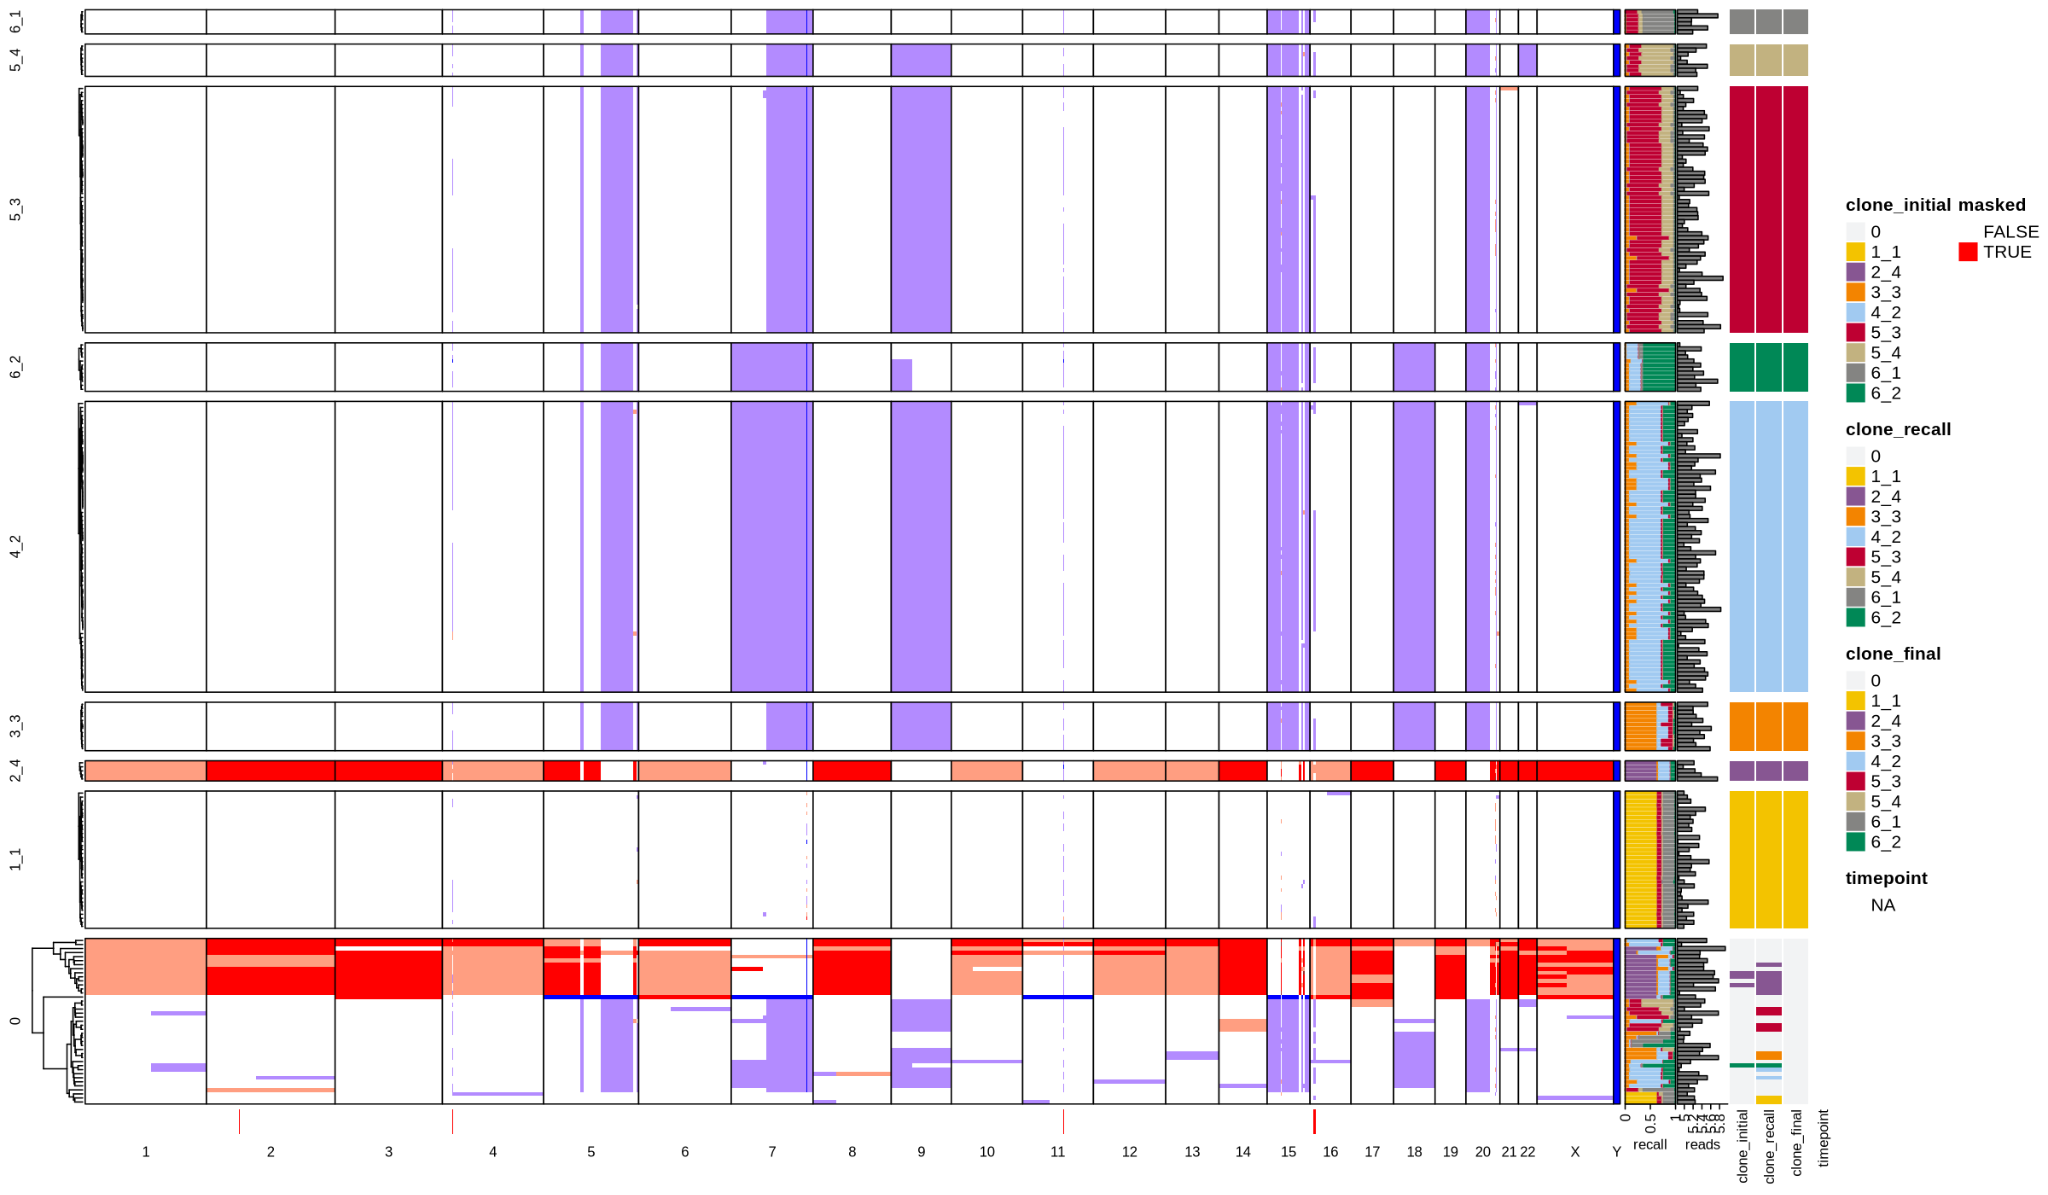


SRC20


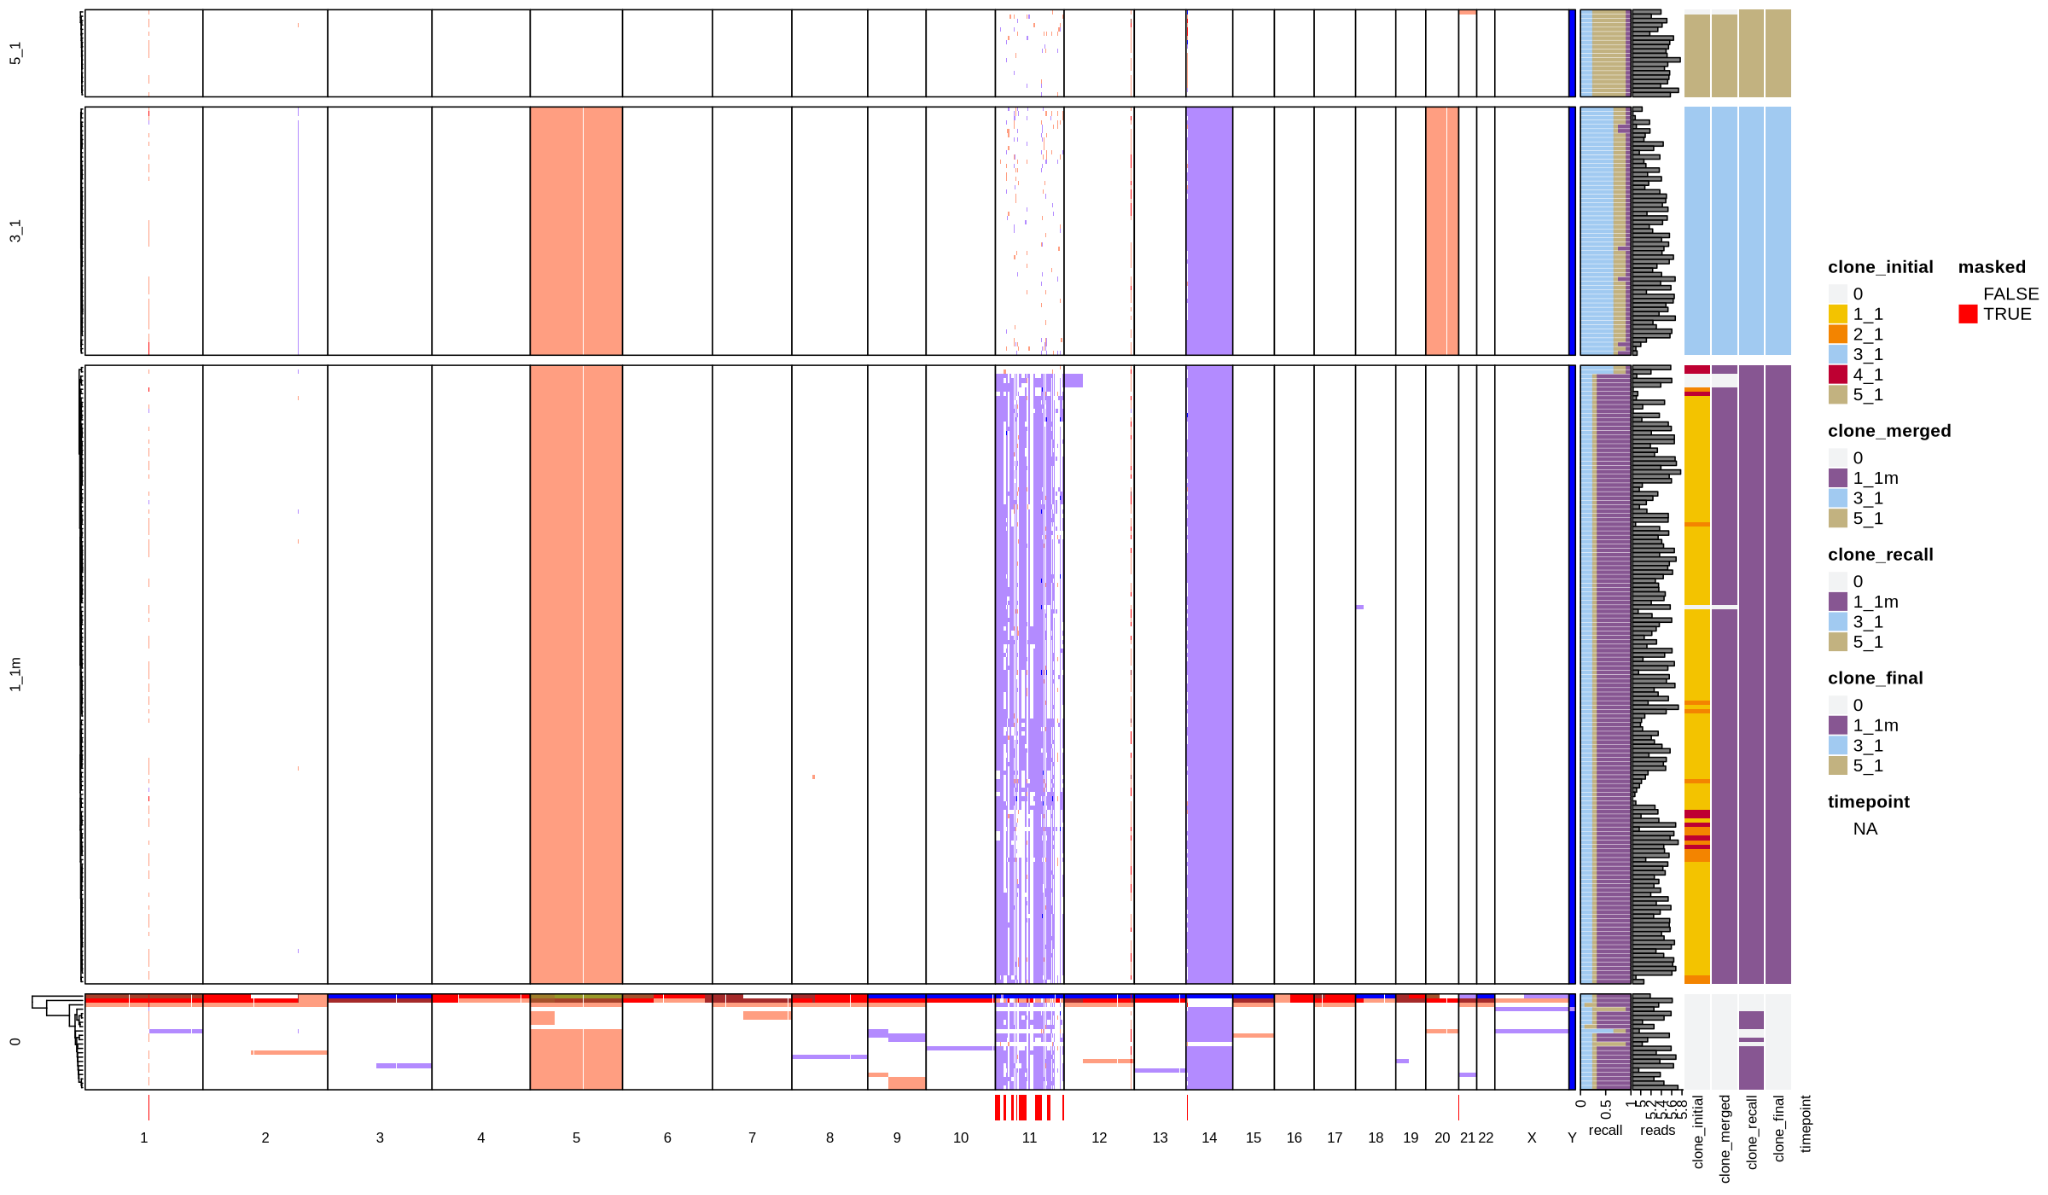


SRC21


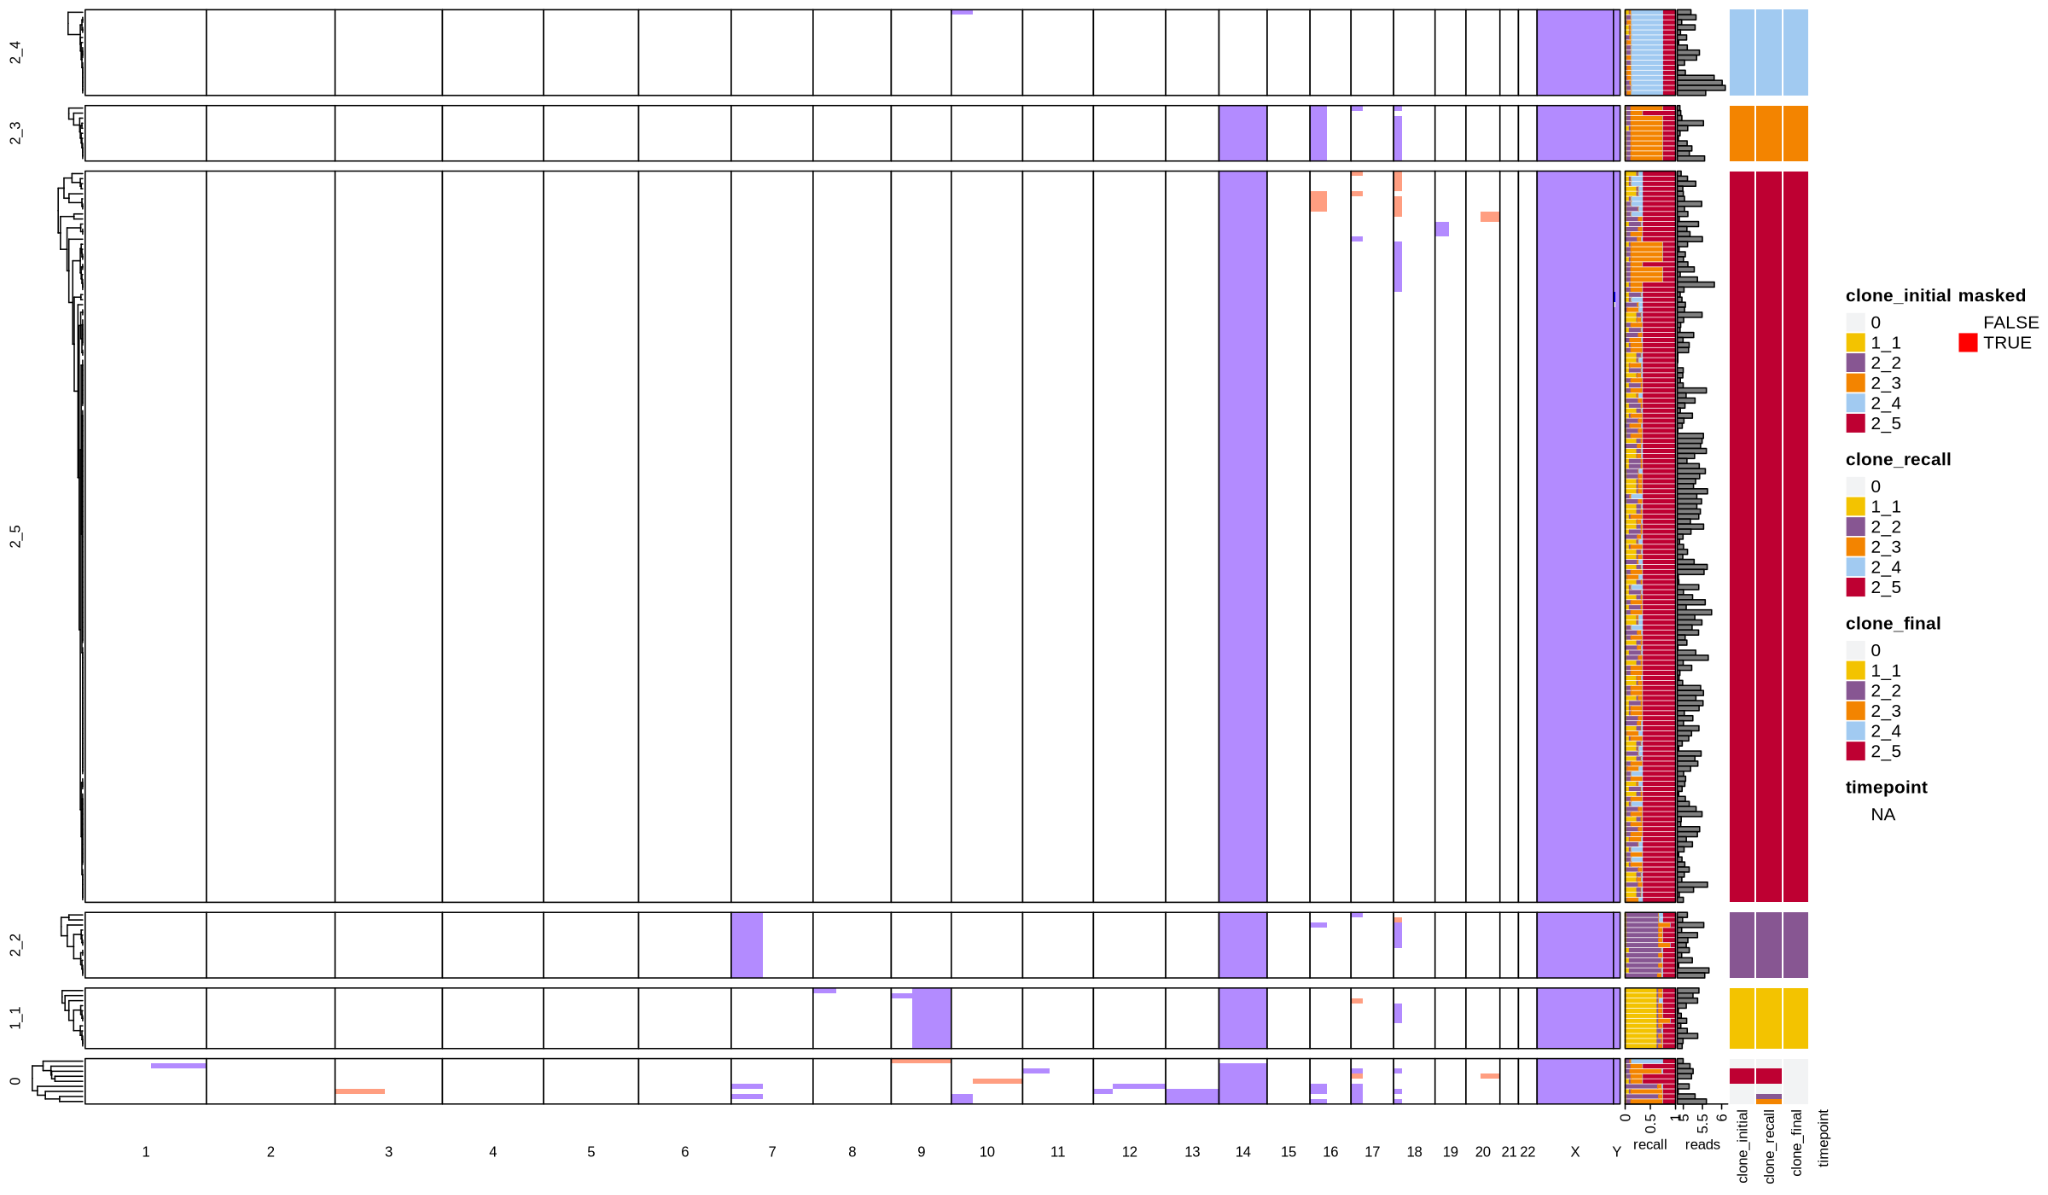


SRC23


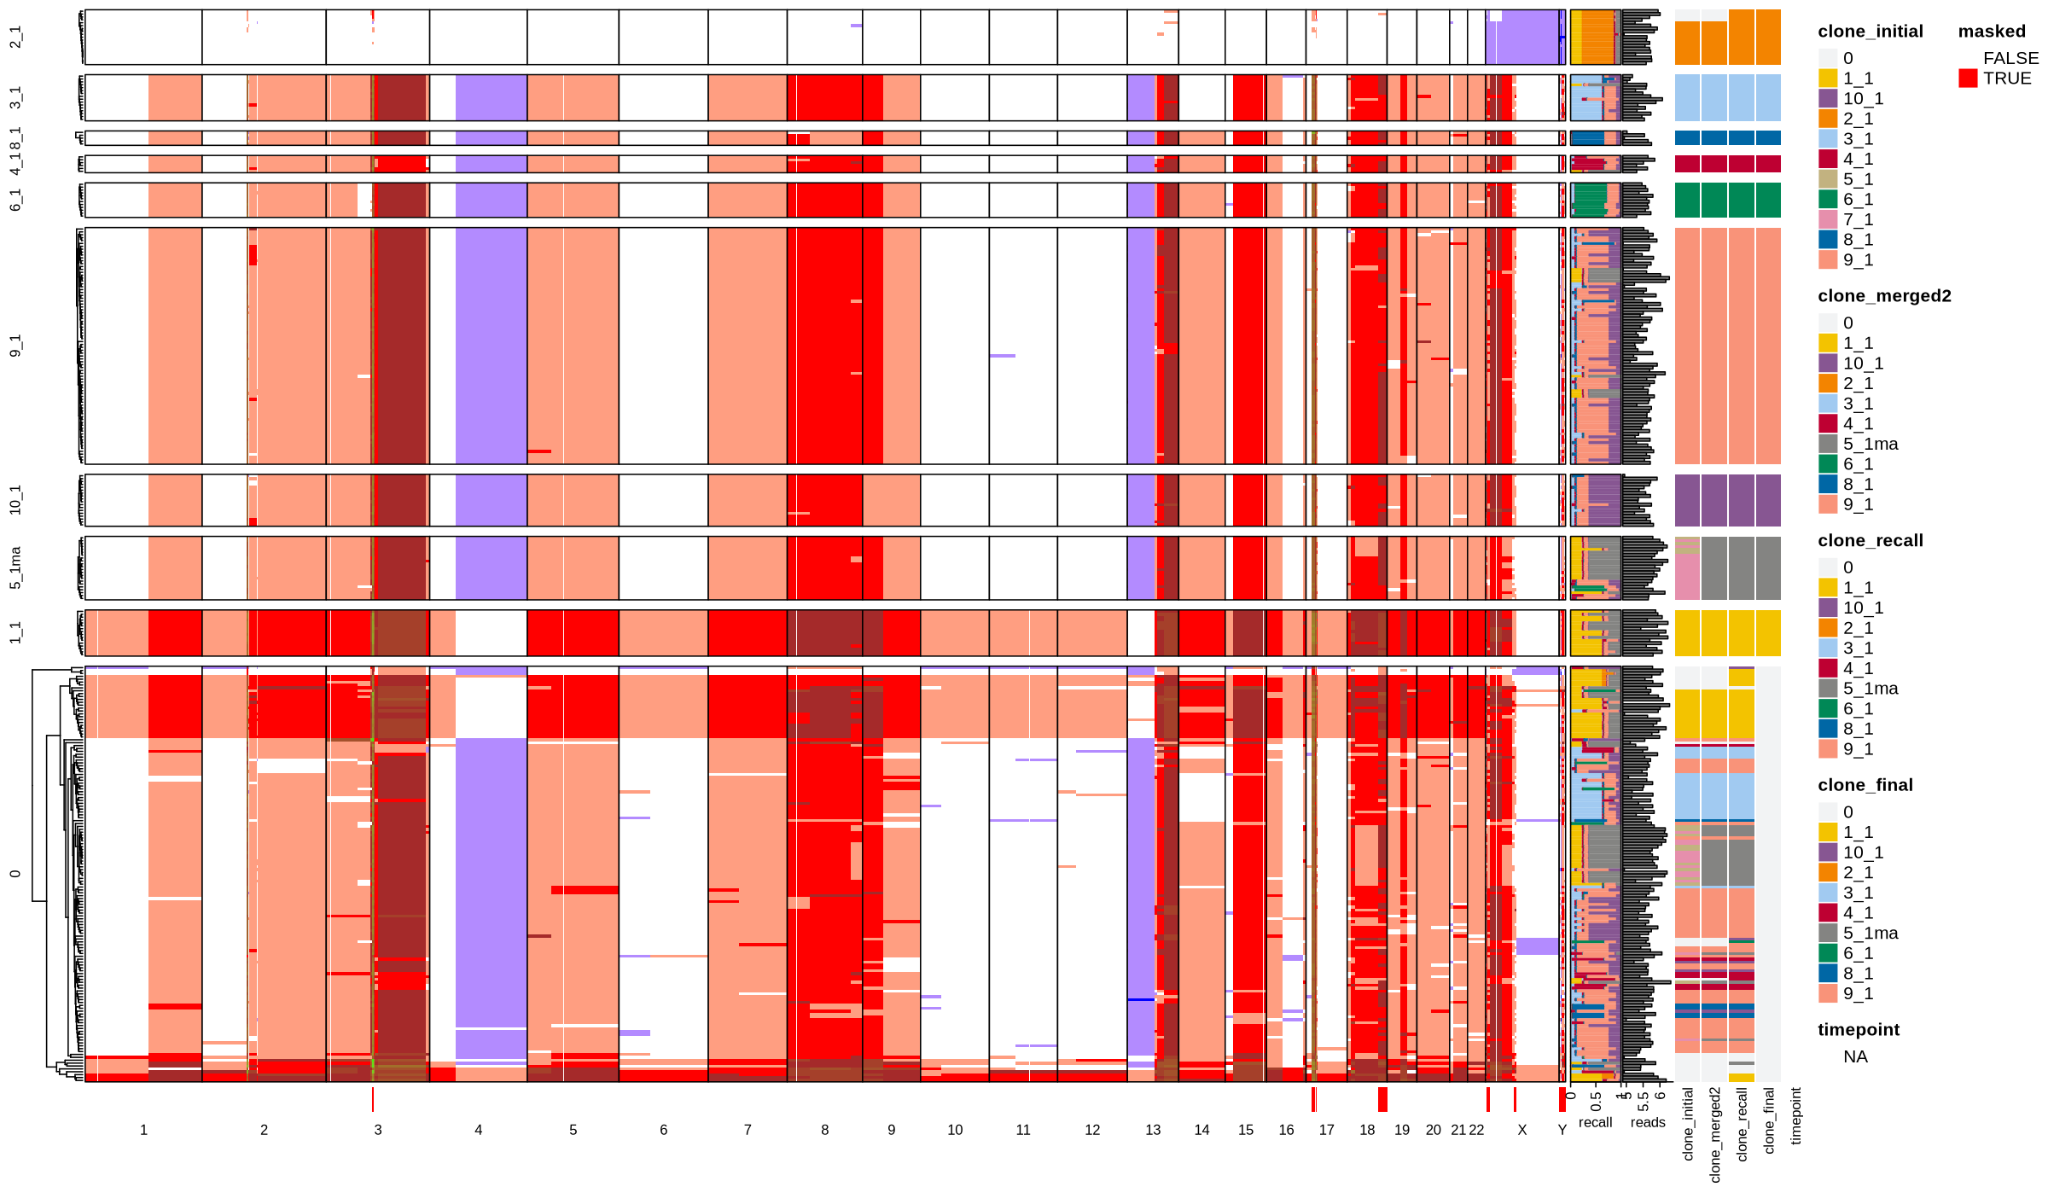


SRC27


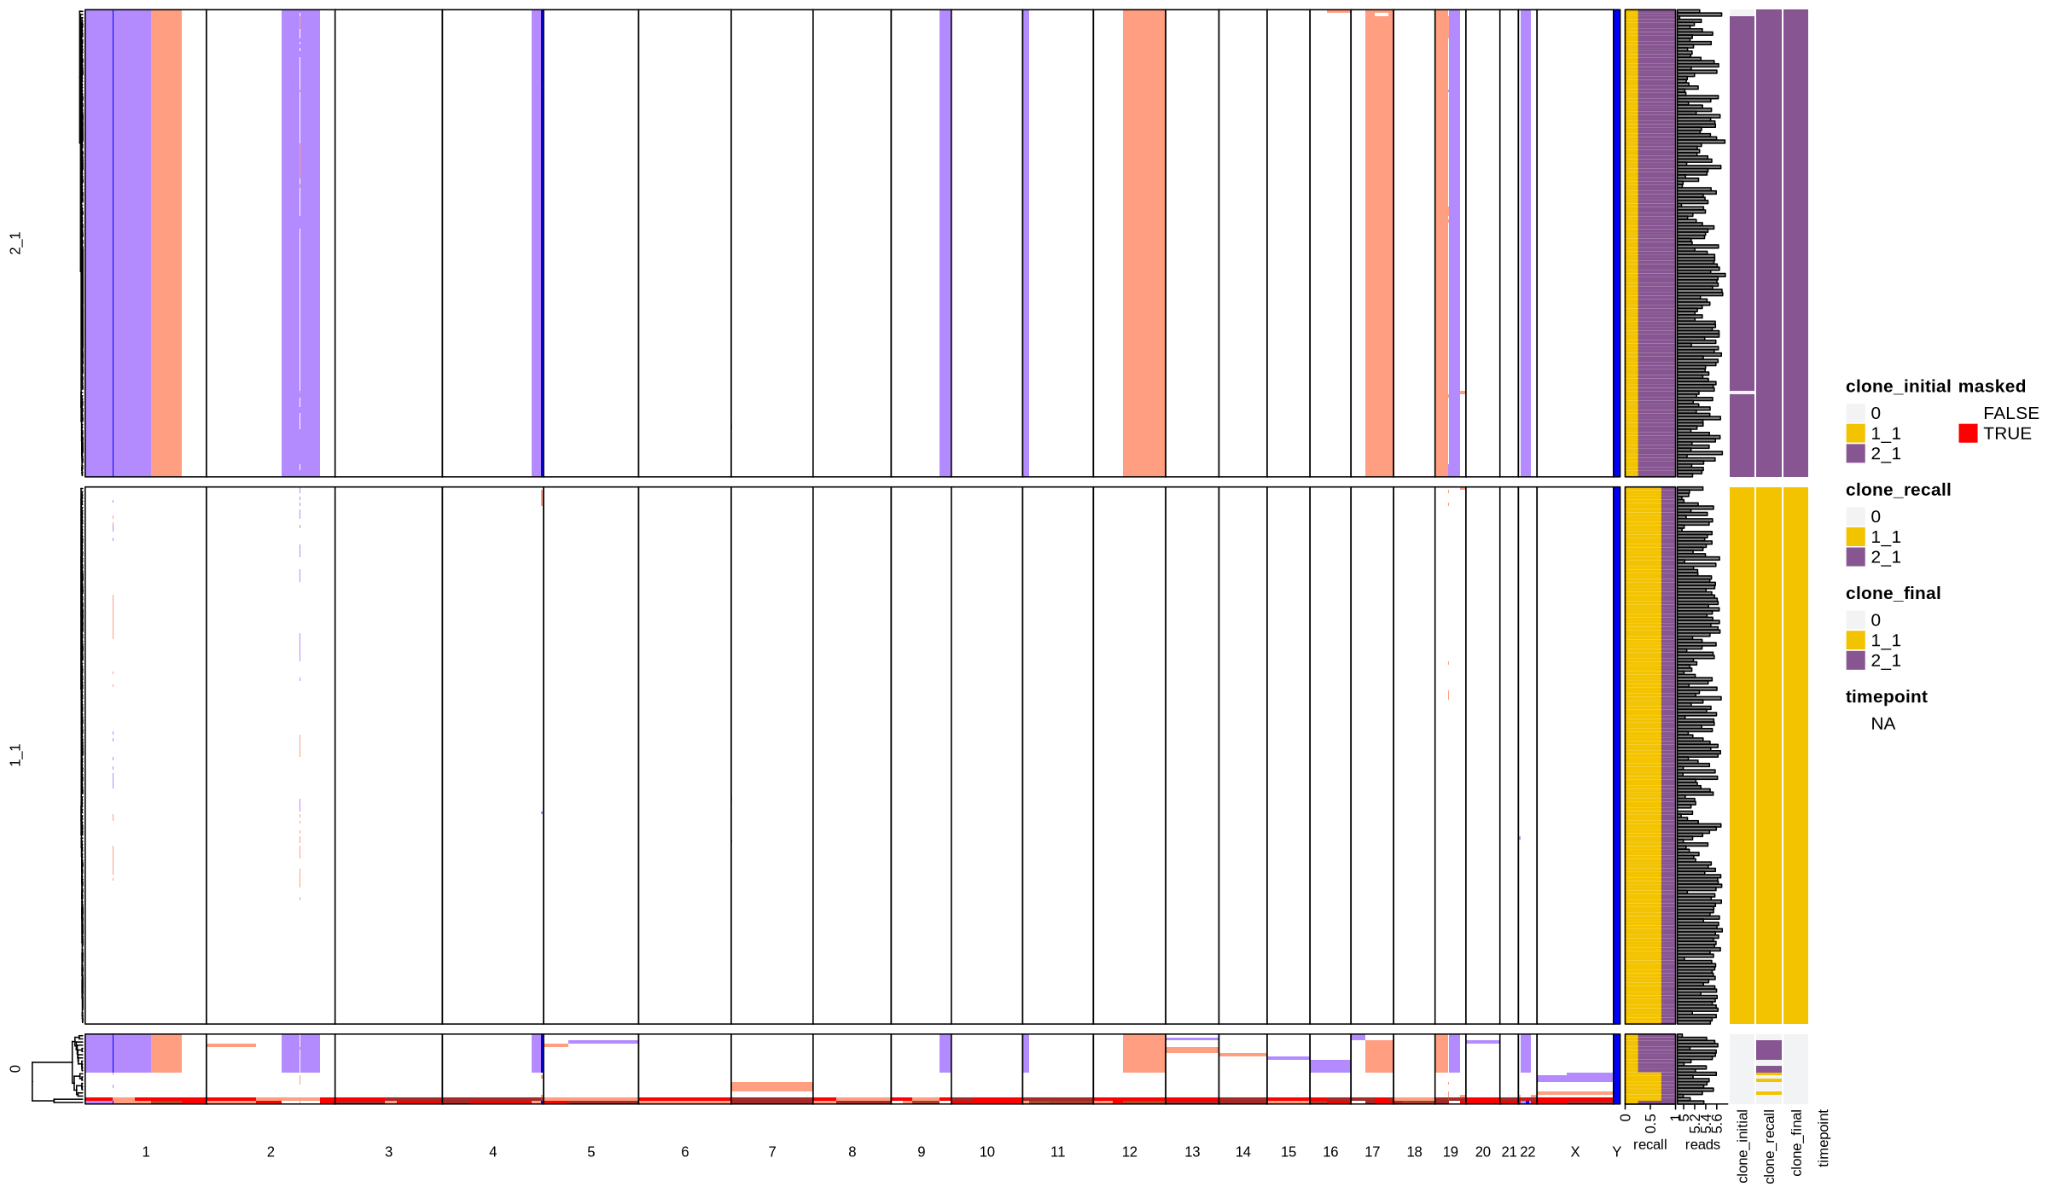


SRC35


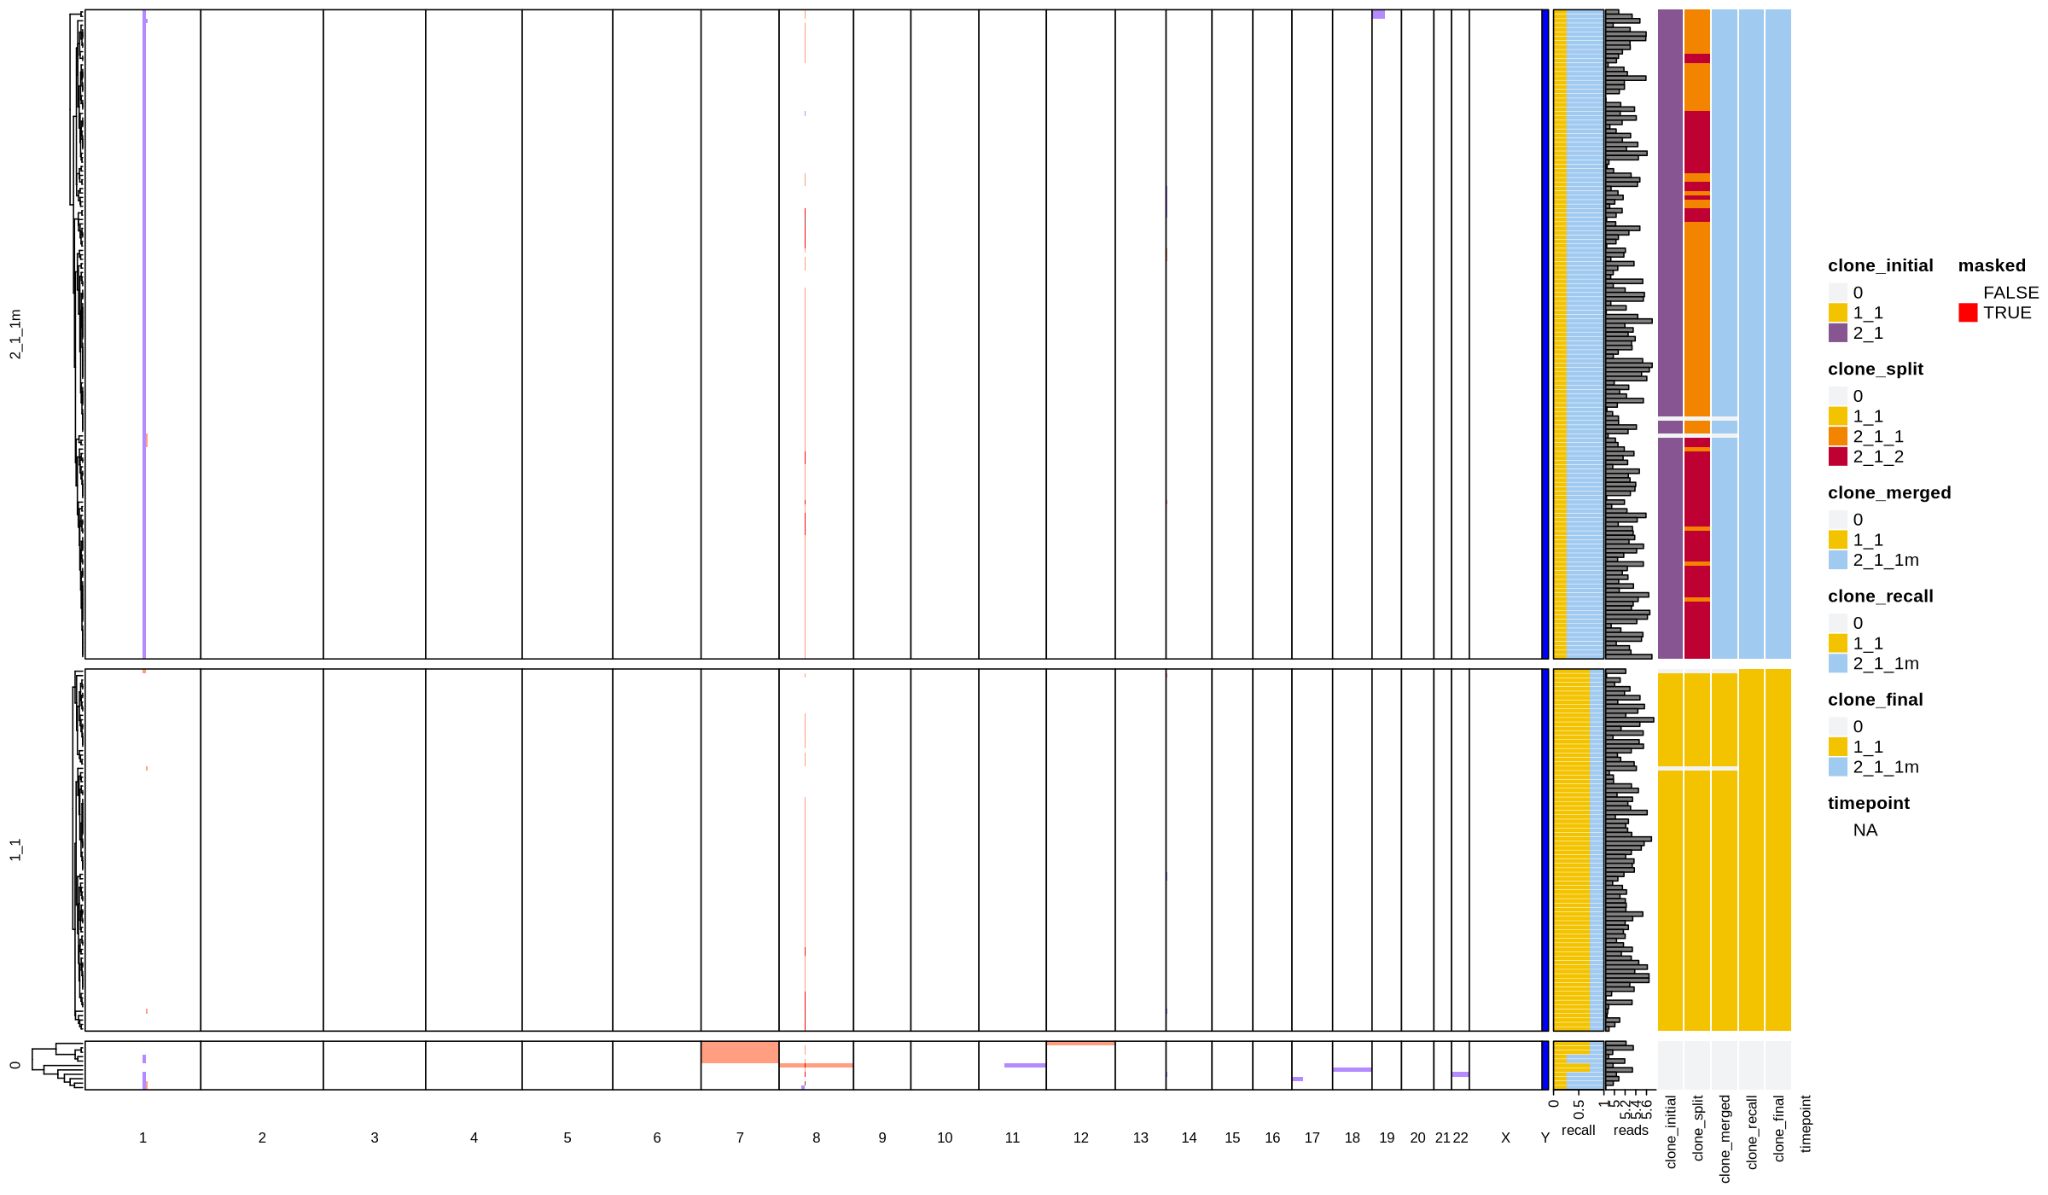


AML2


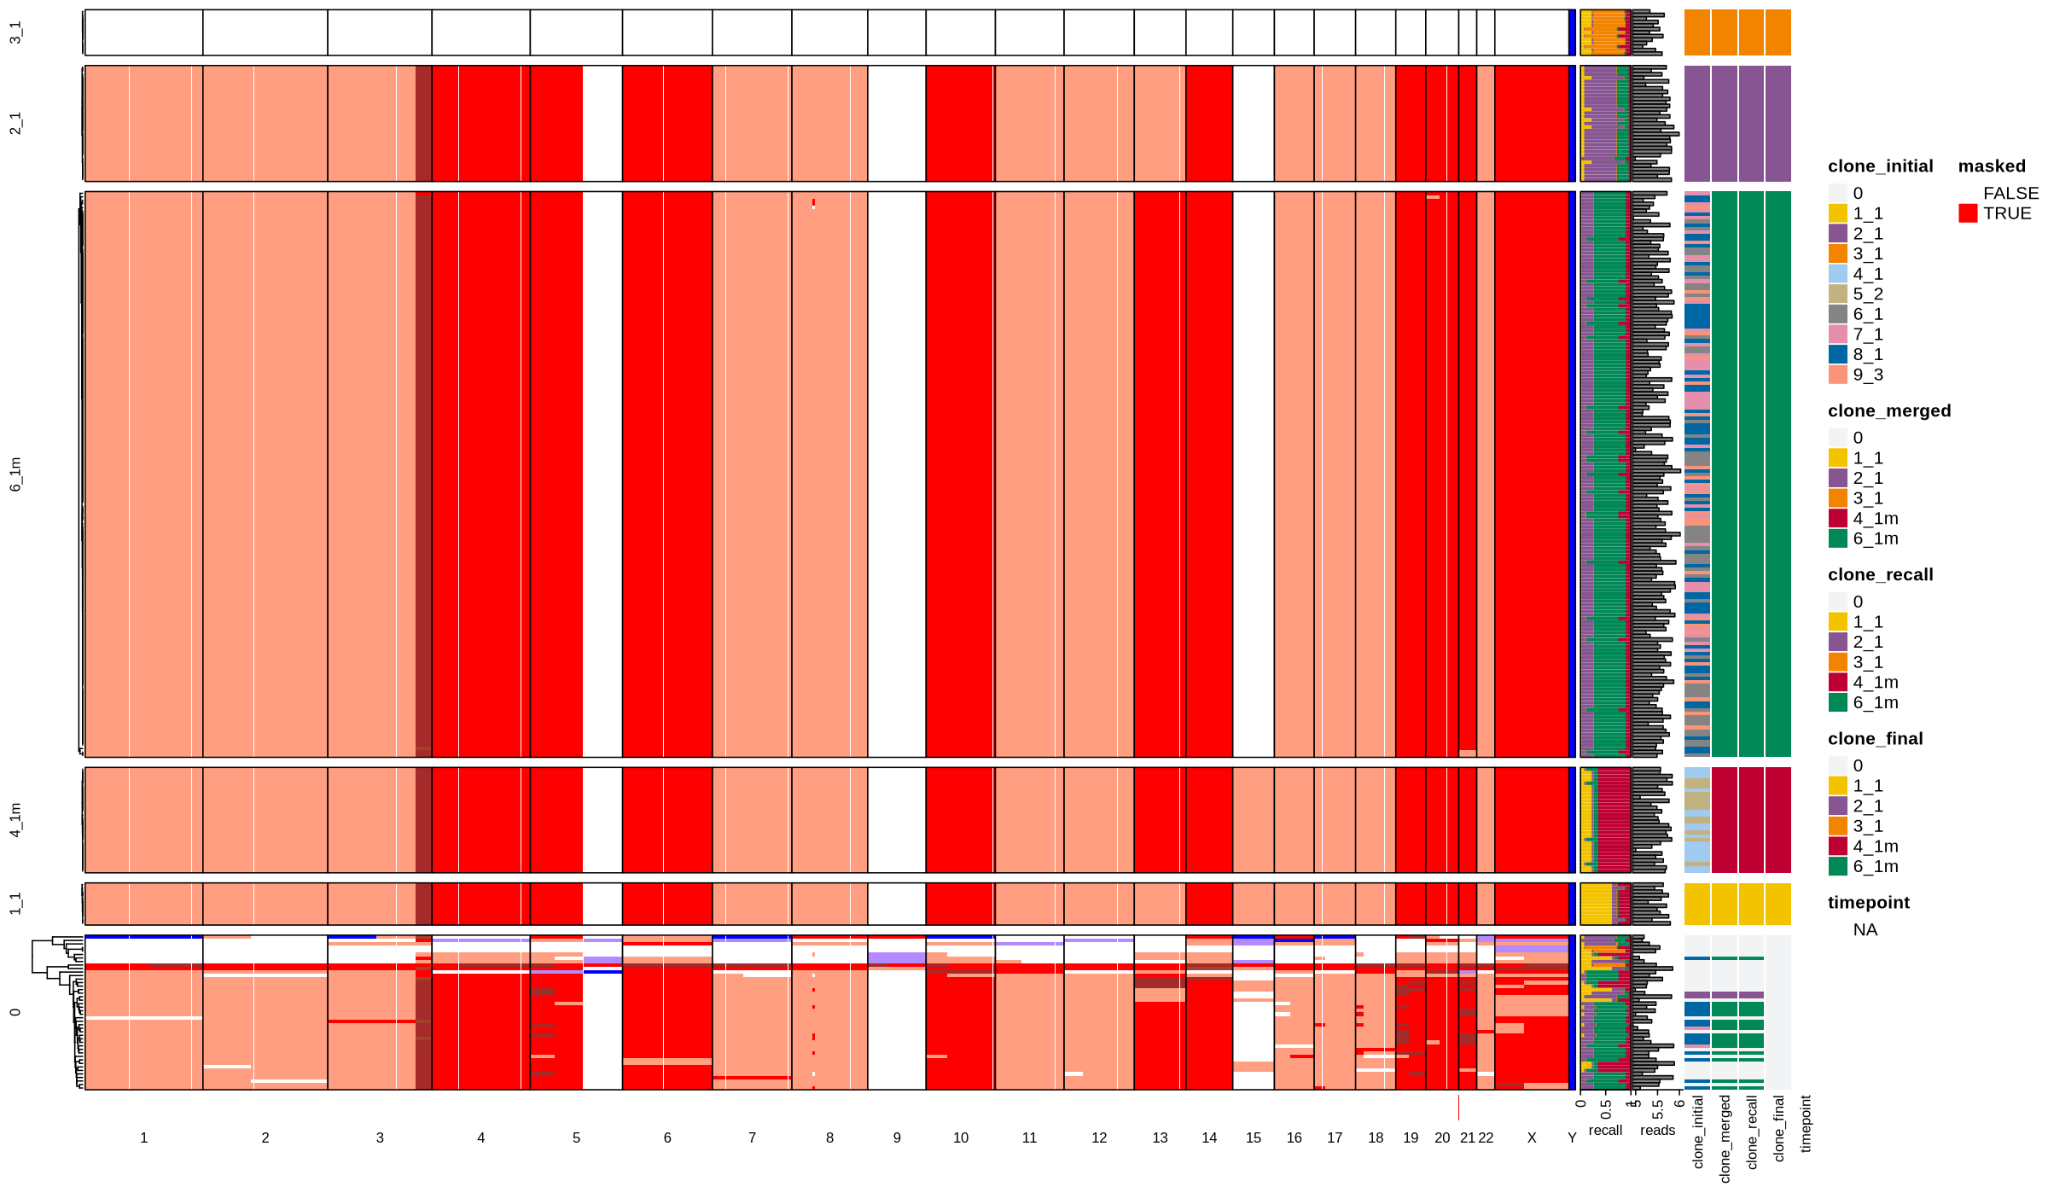


AML4


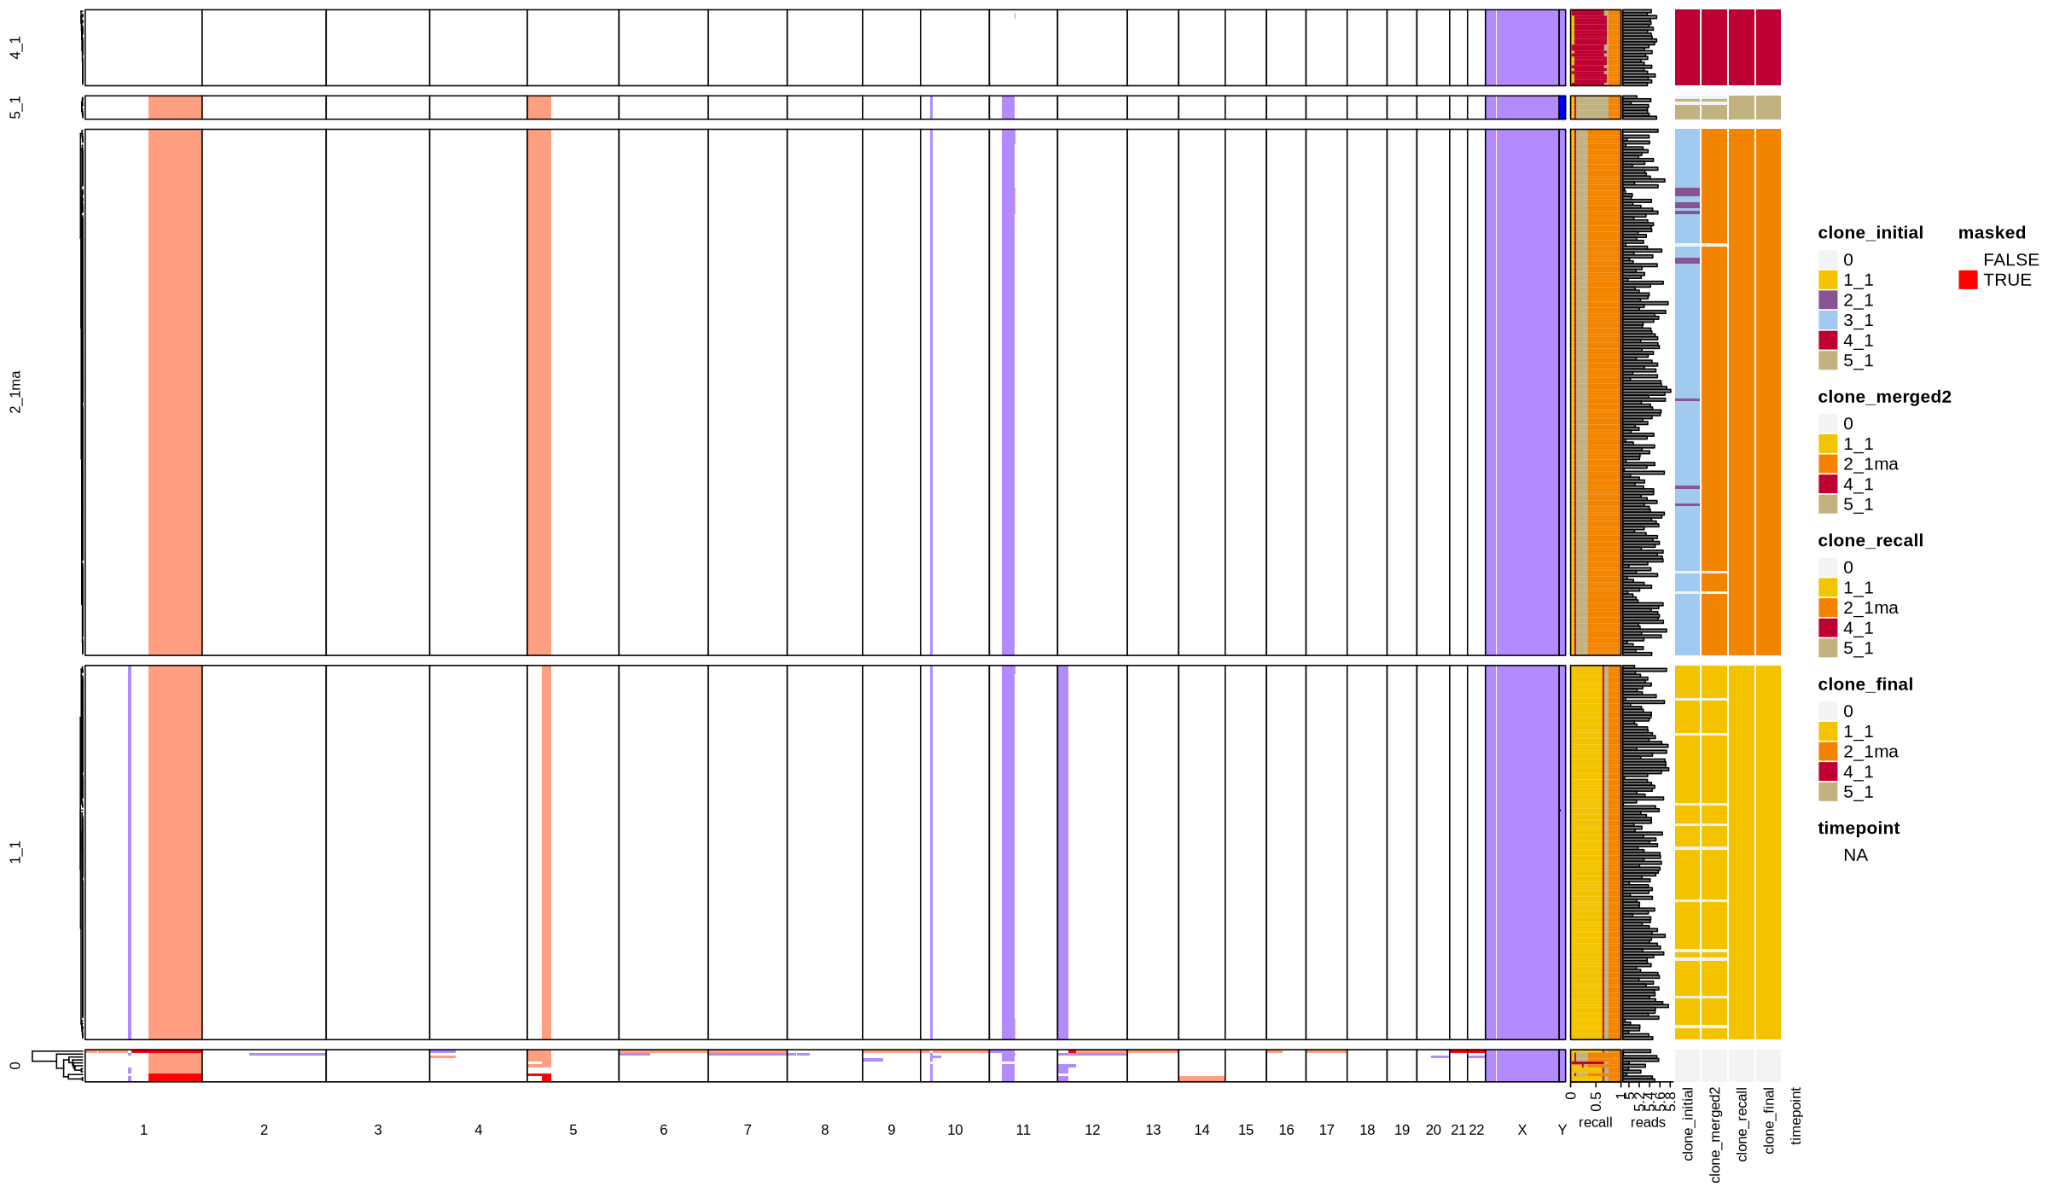


AML5


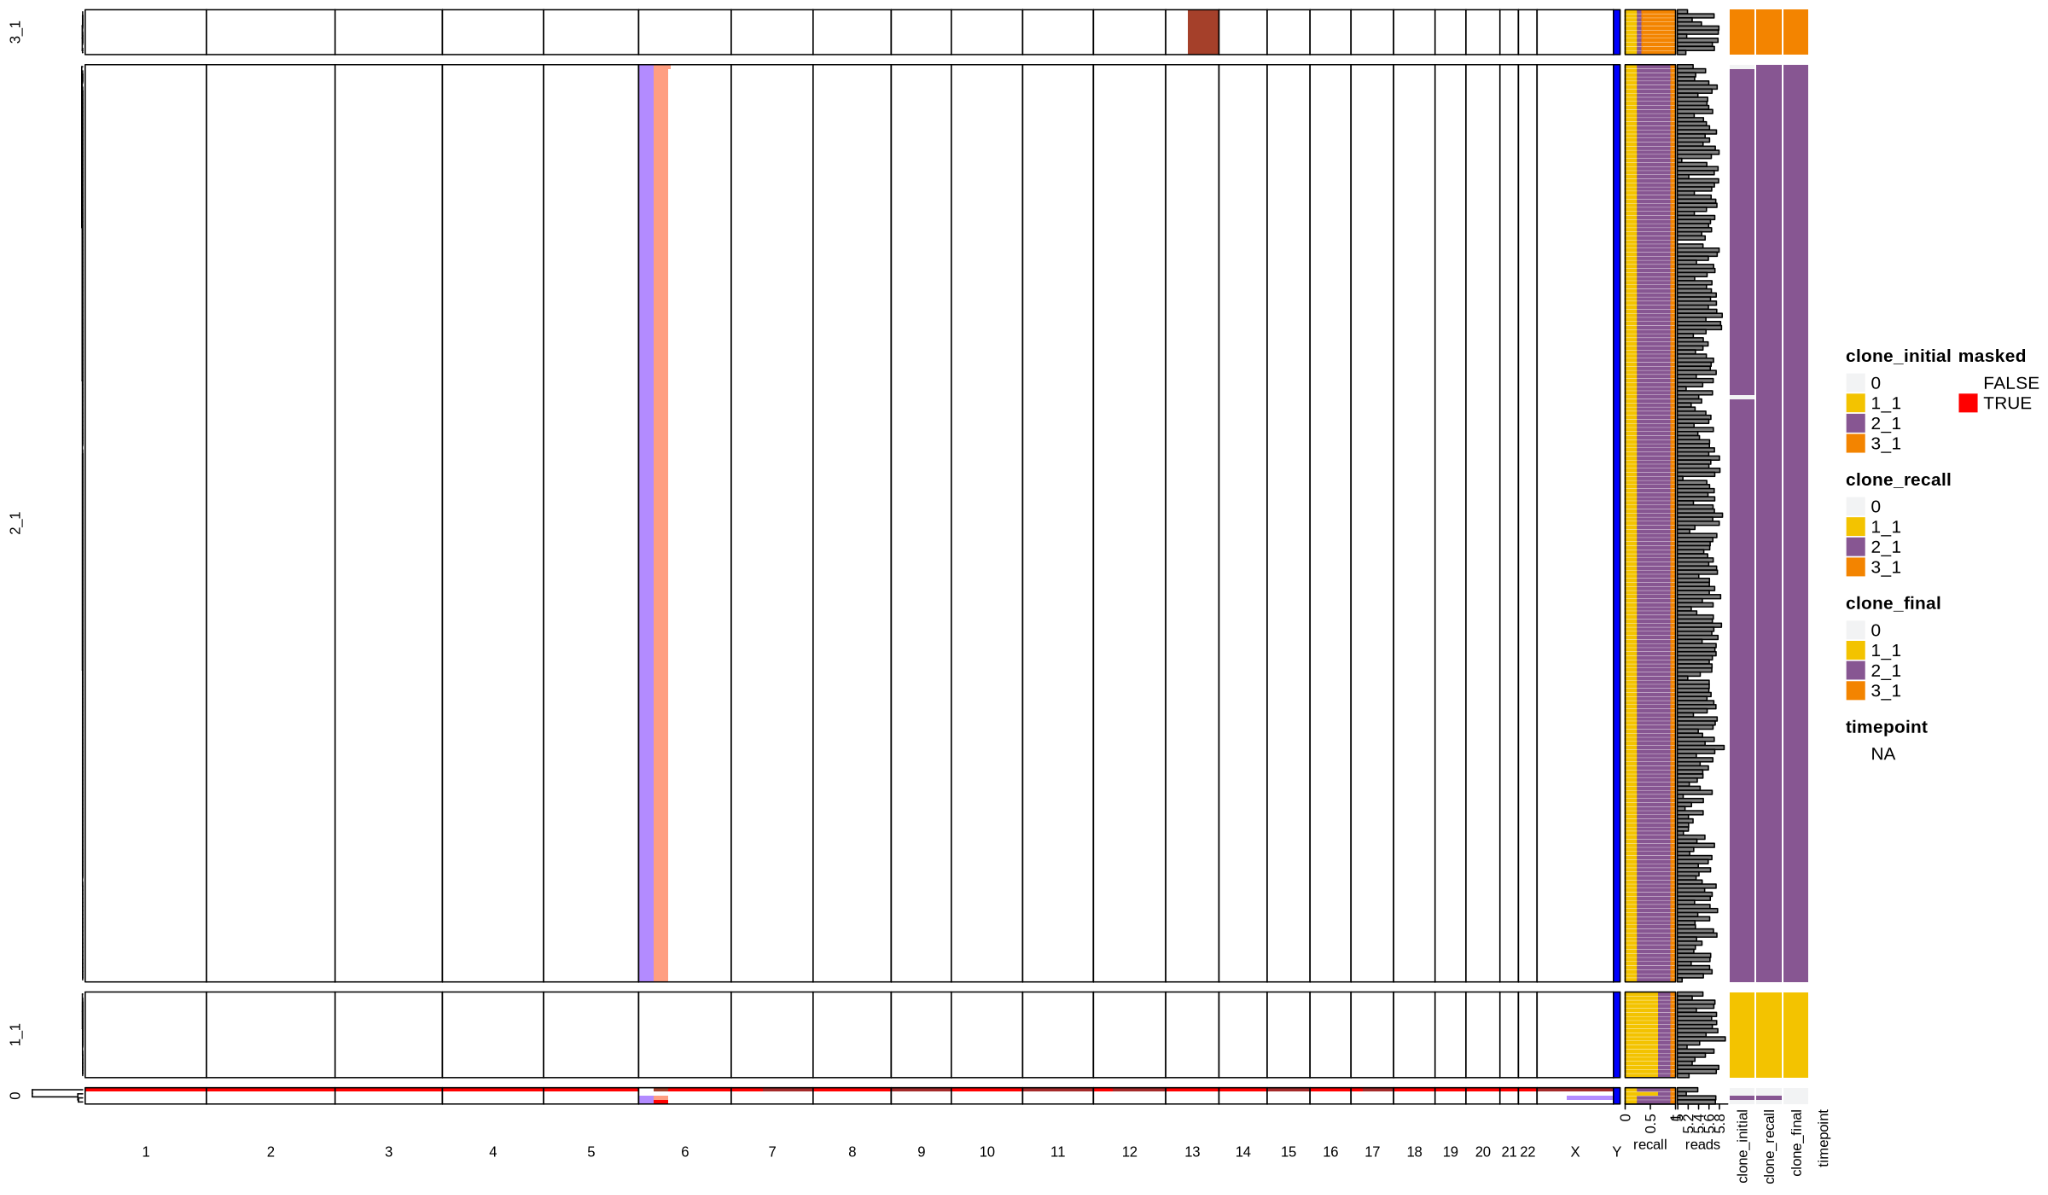


AML6
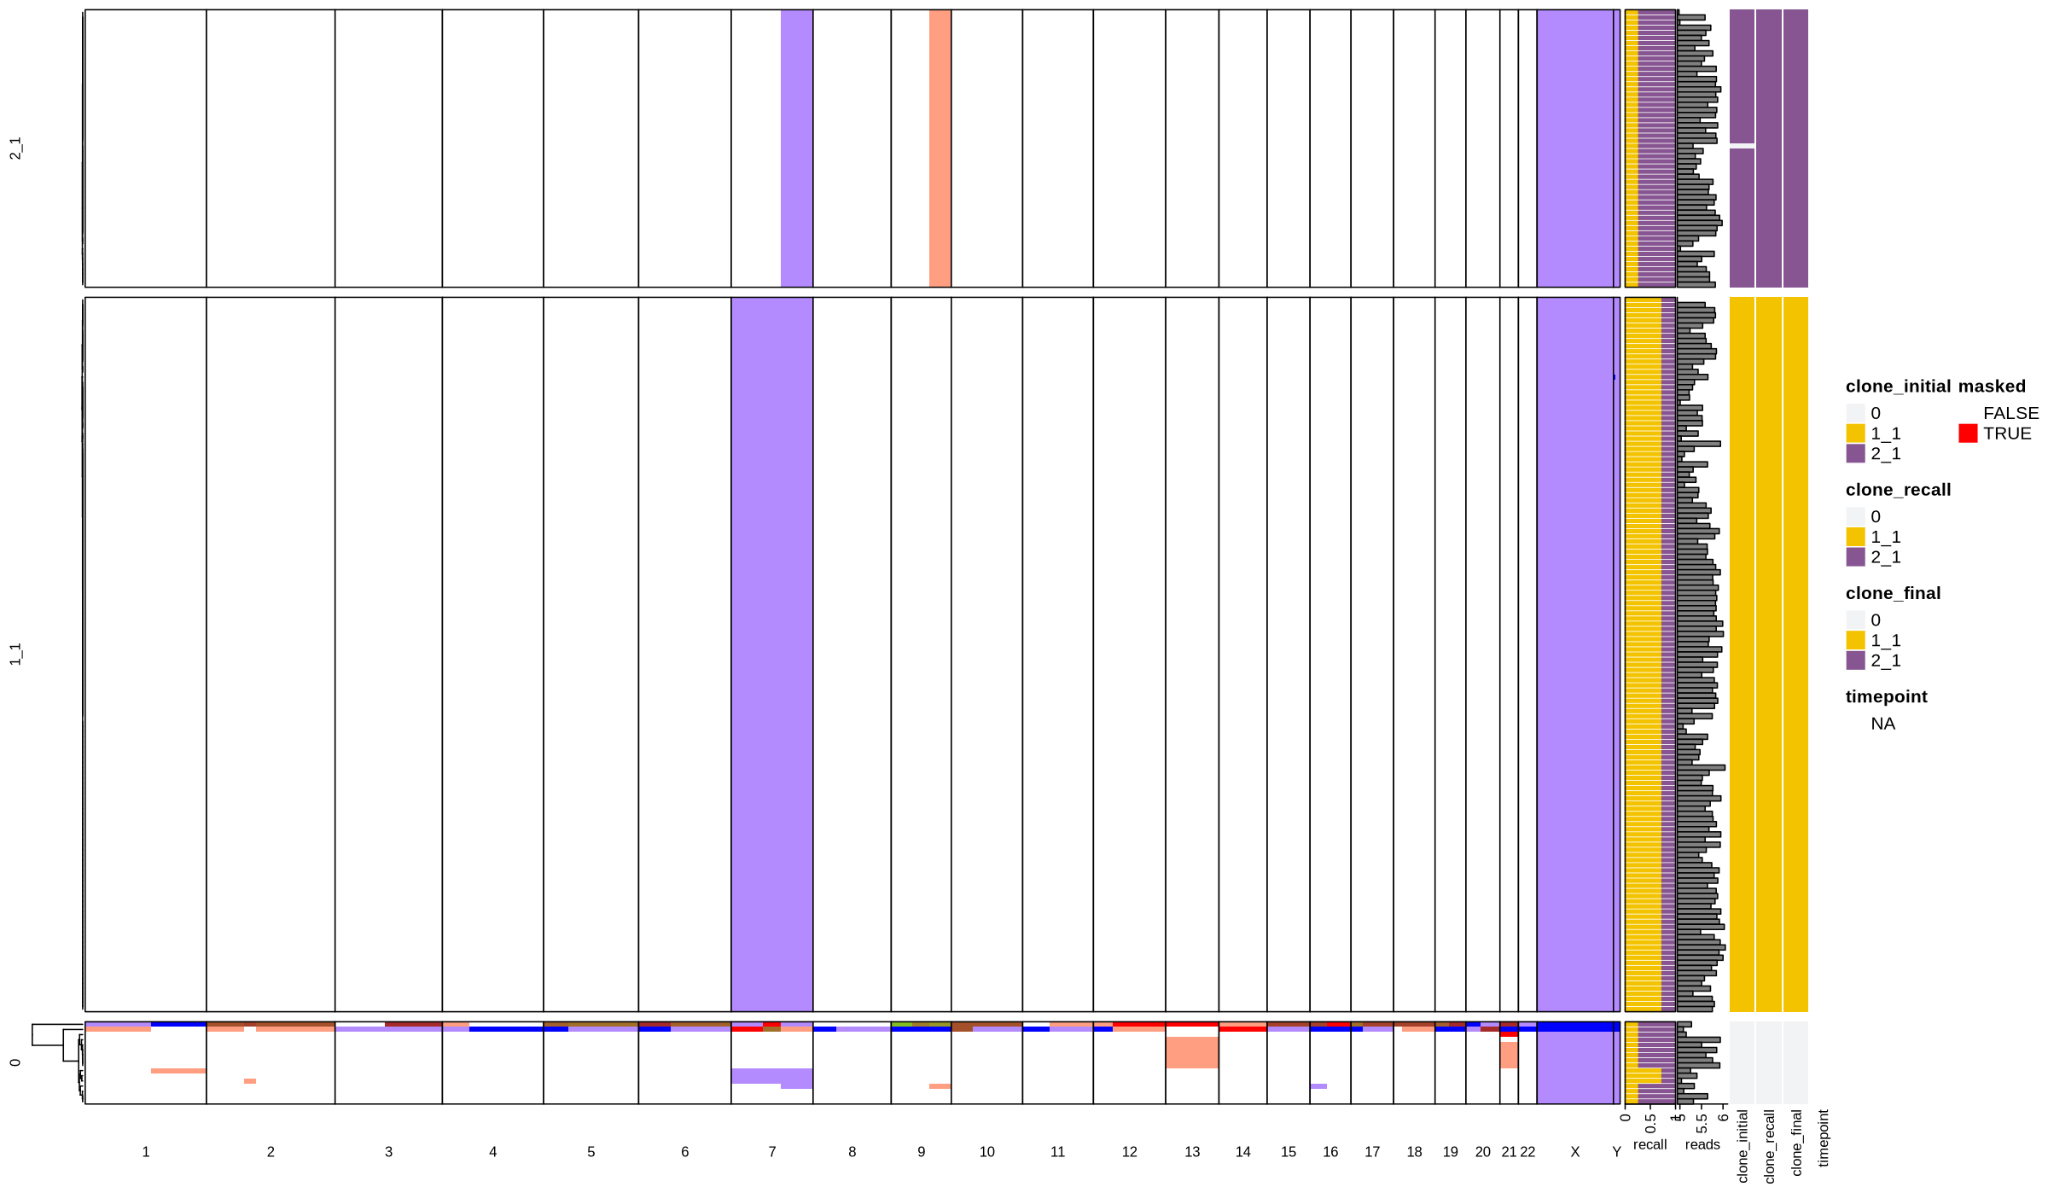


AML9


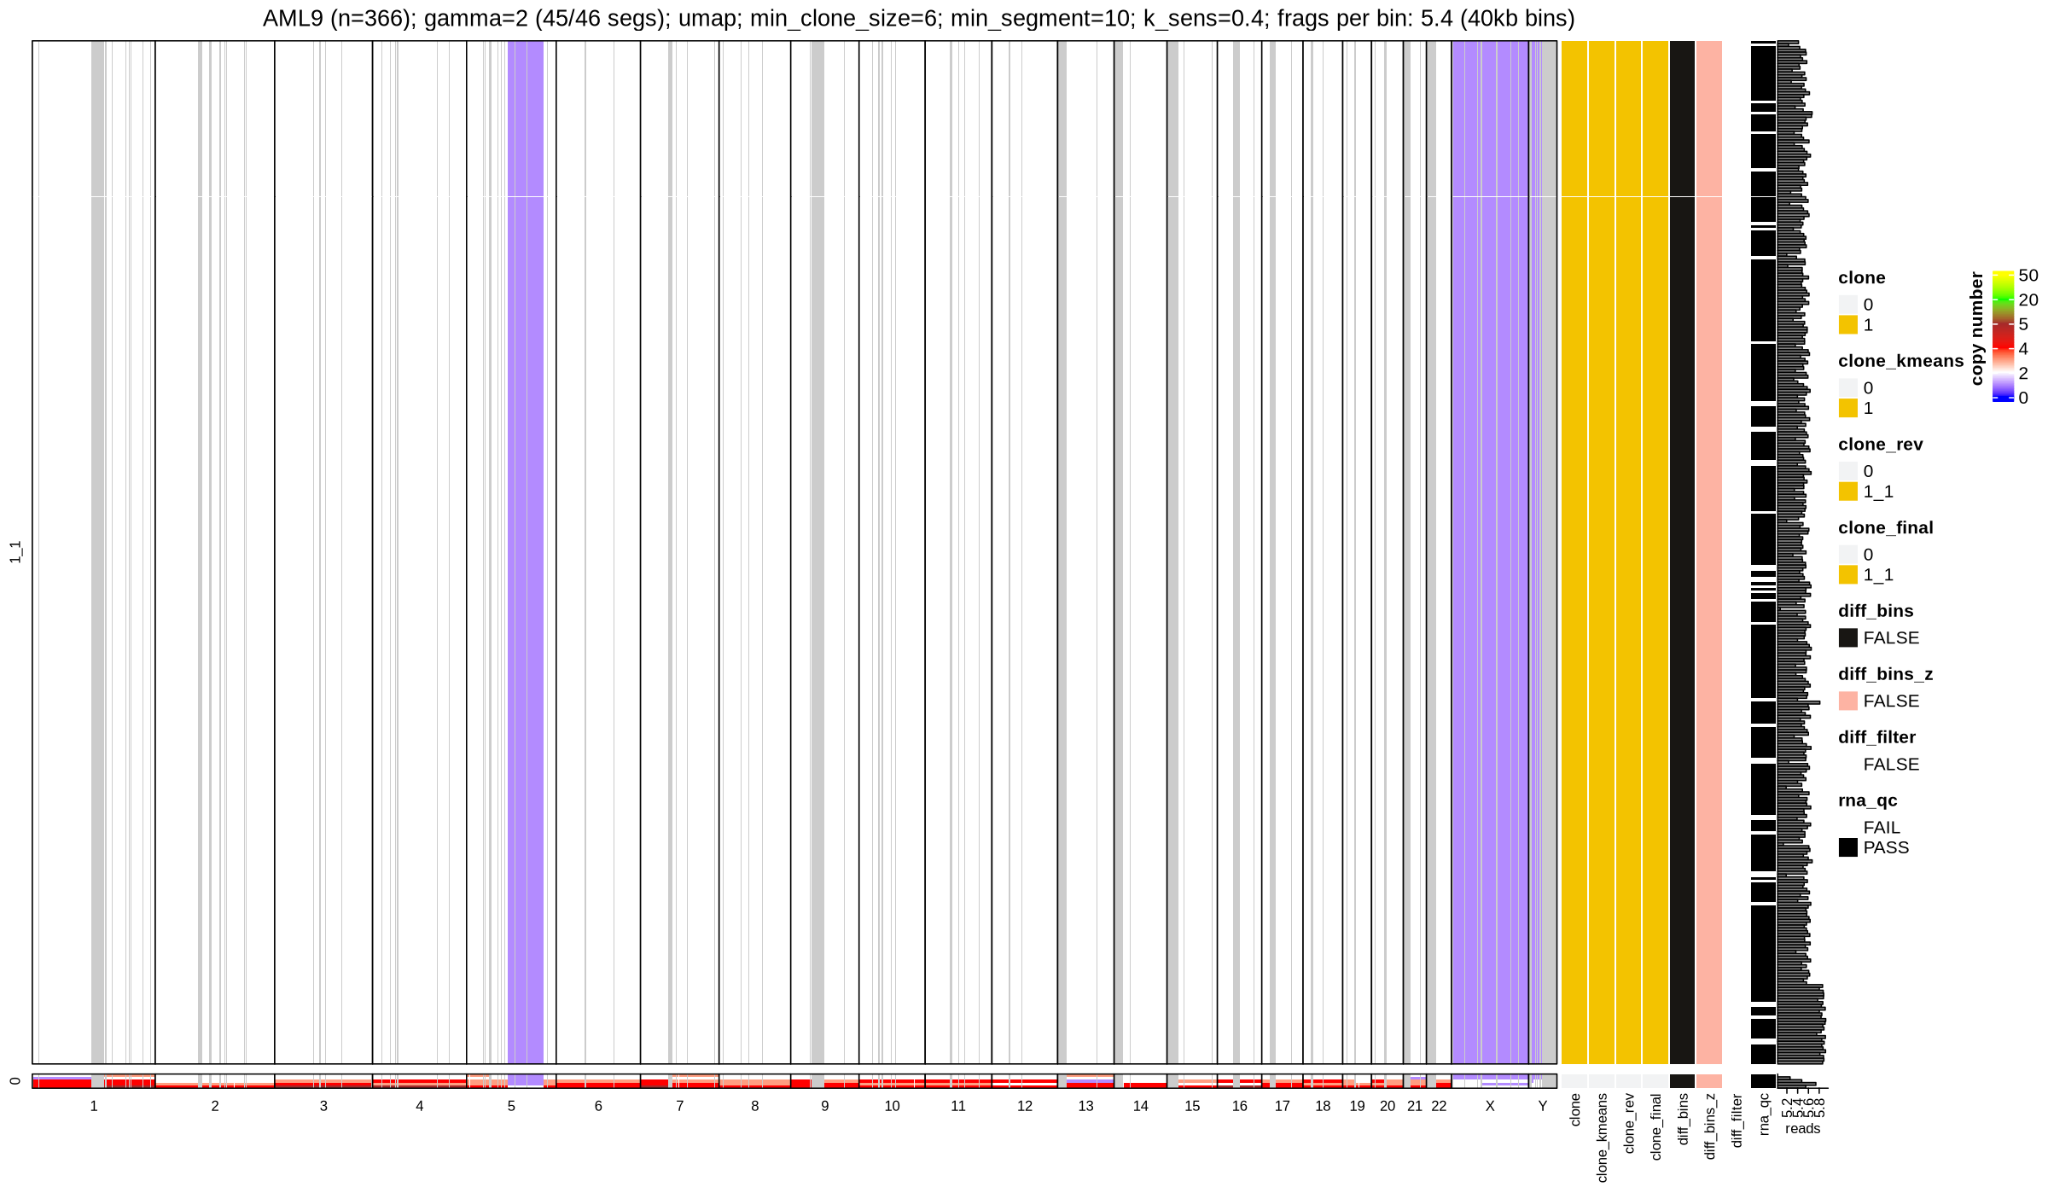


OC1


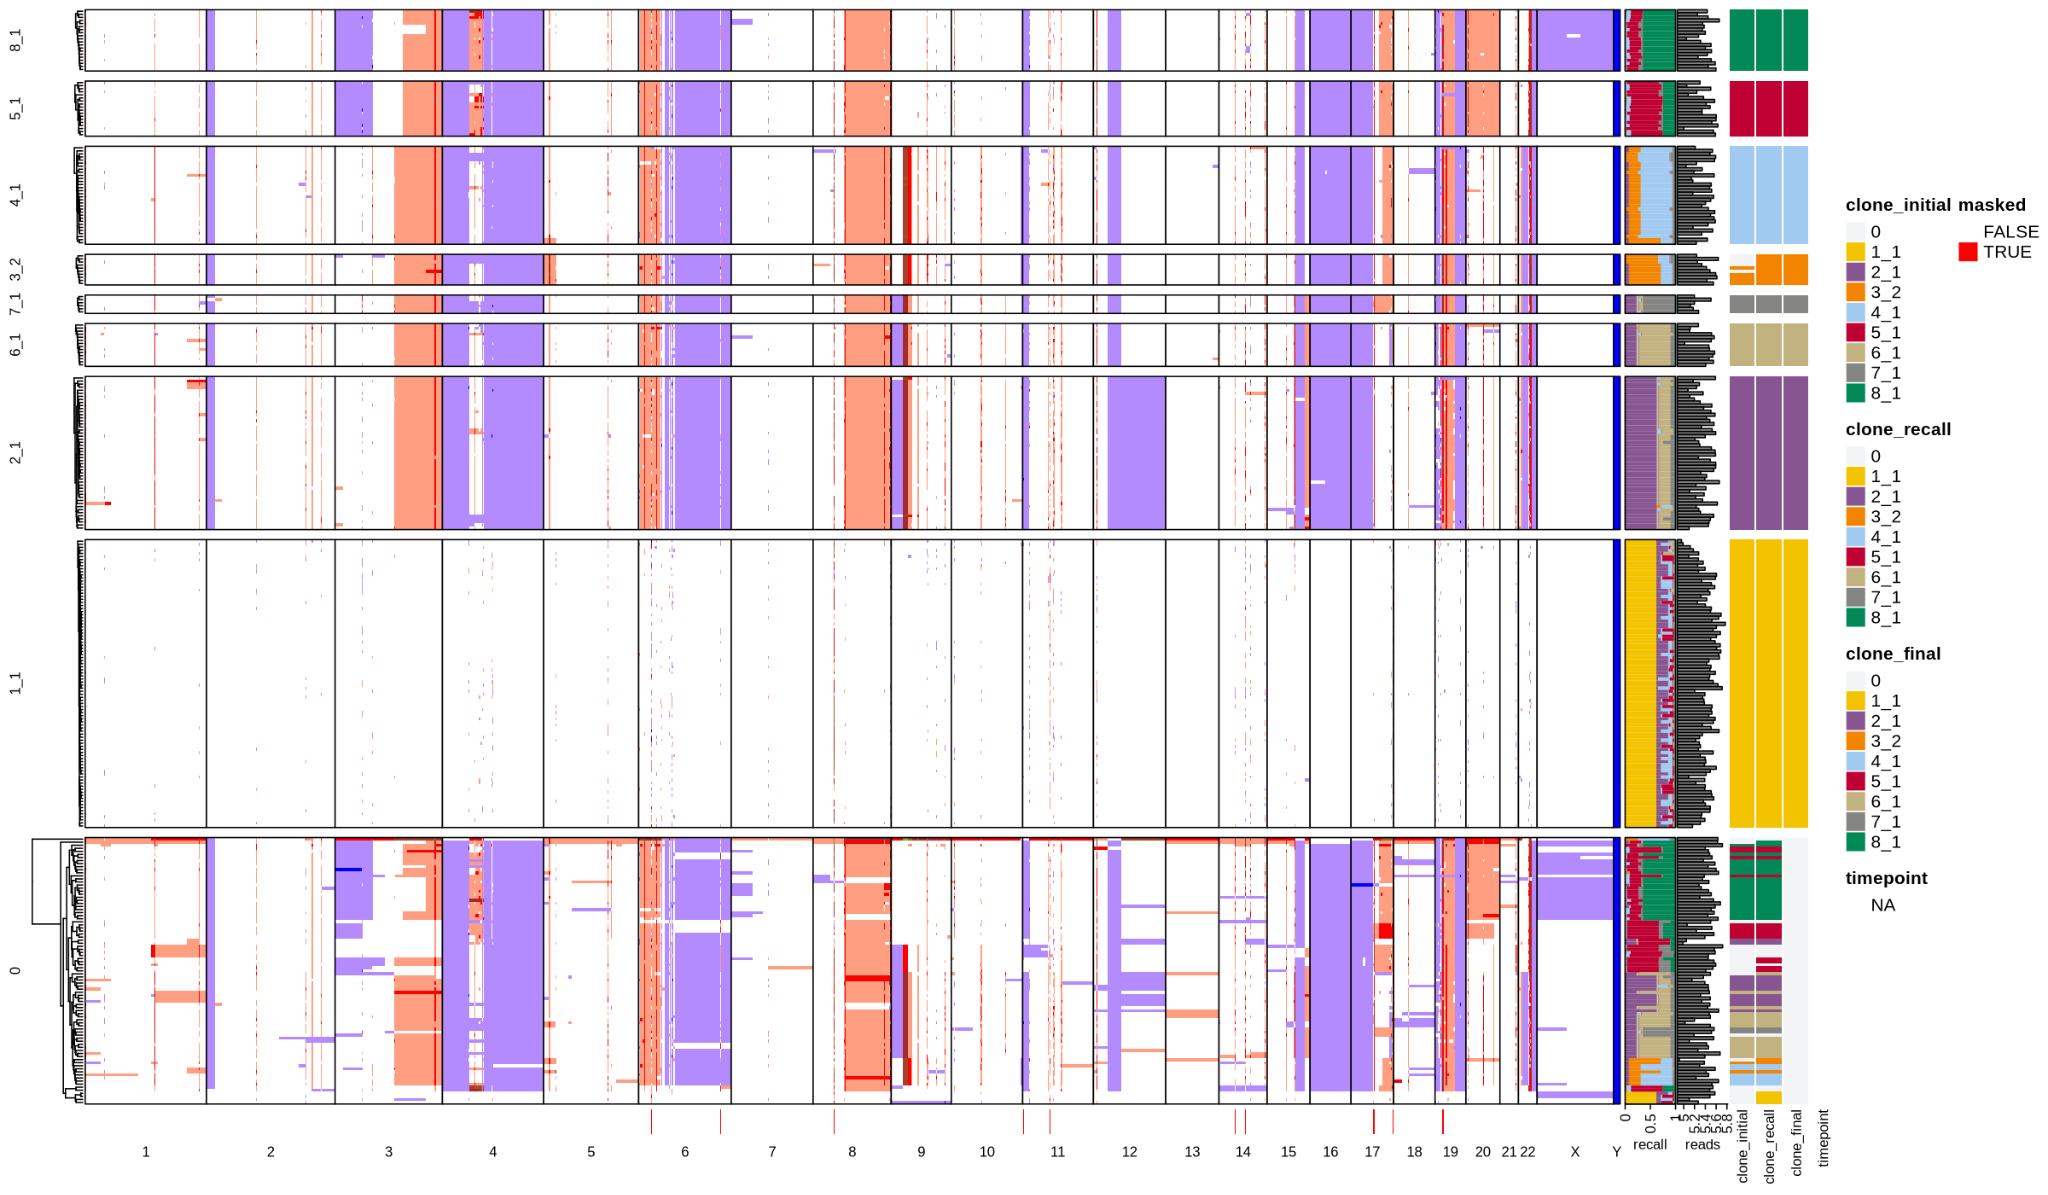


OC2


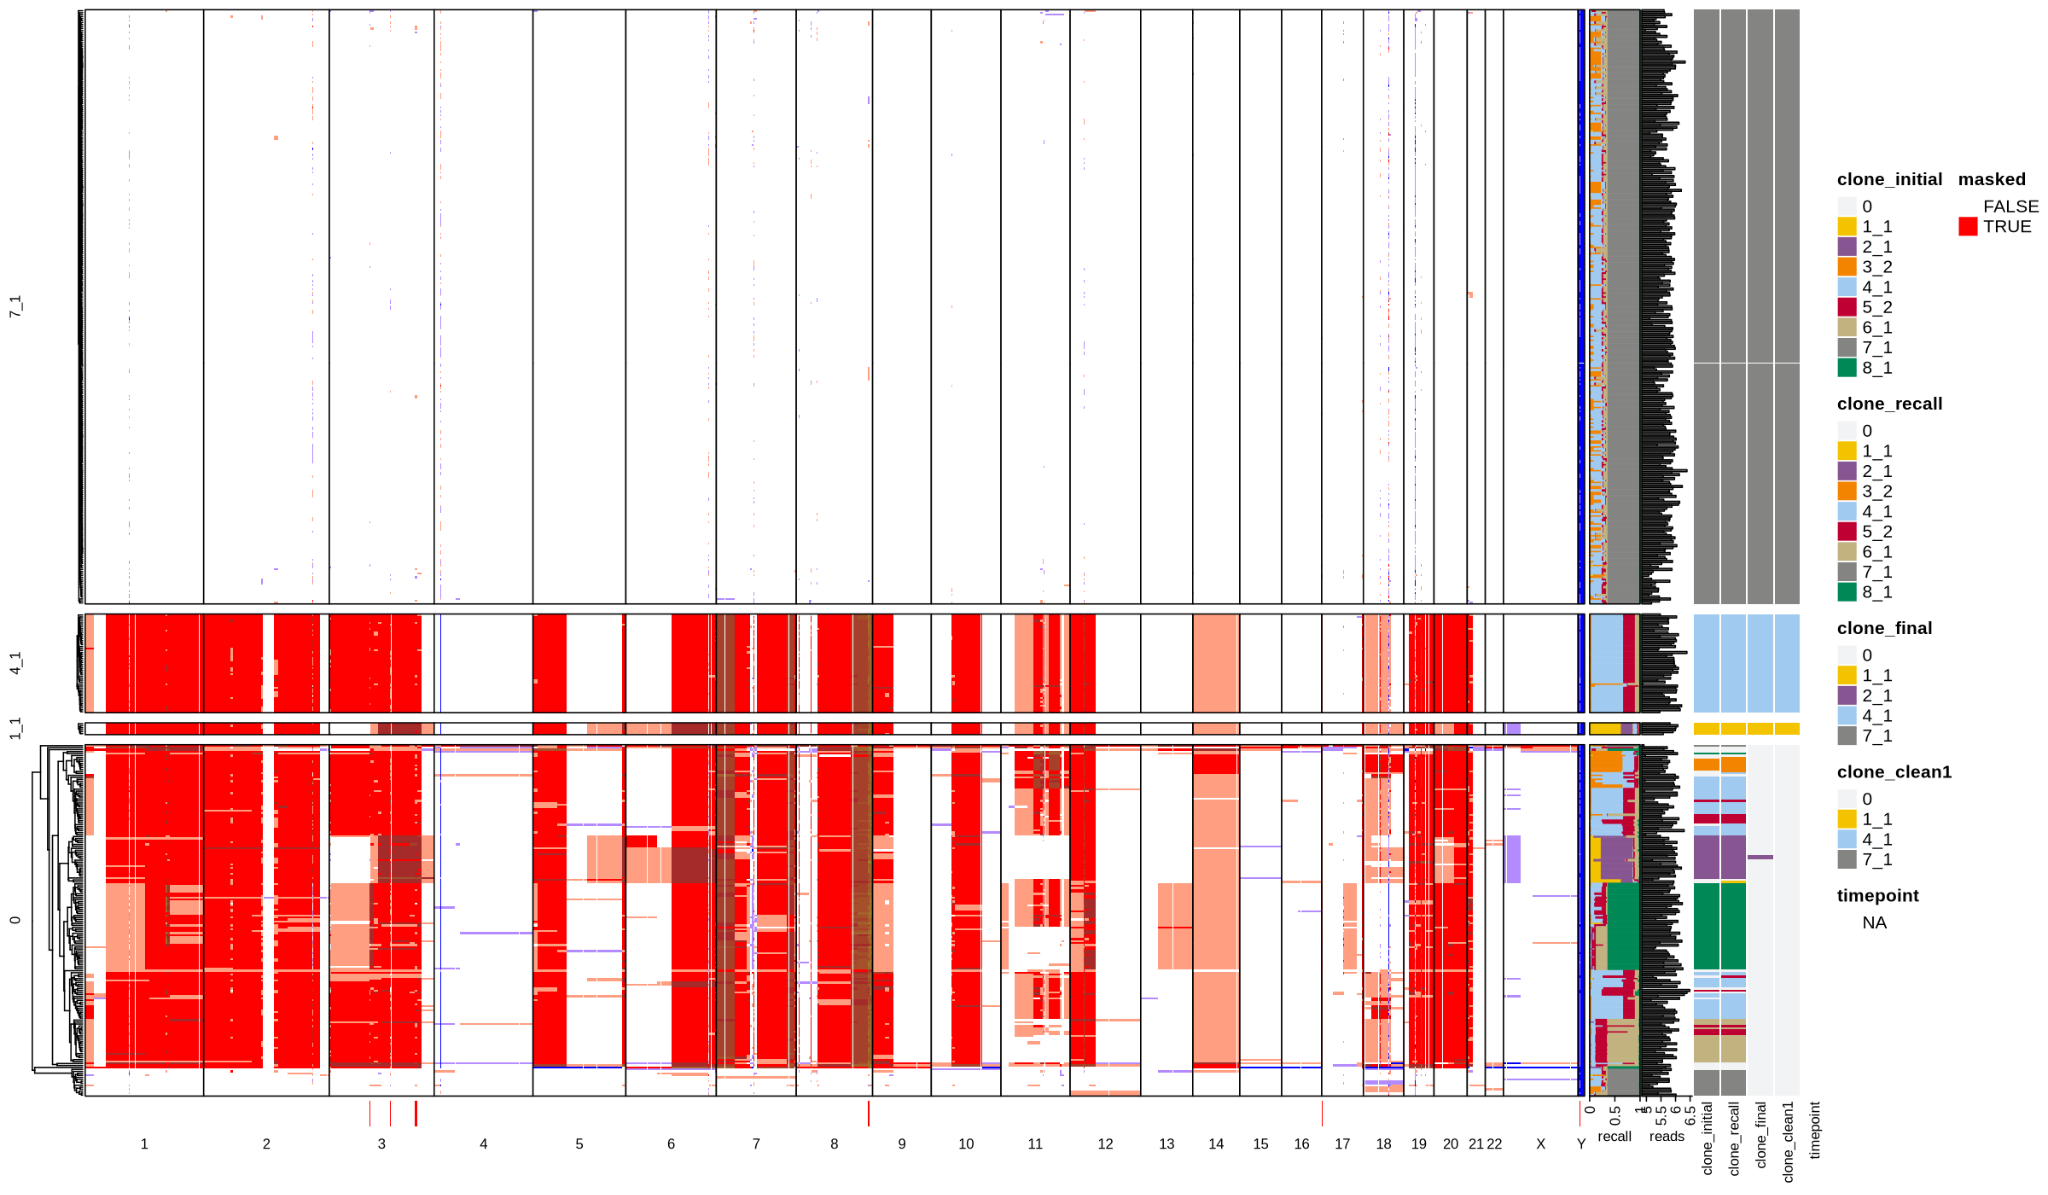


OC4


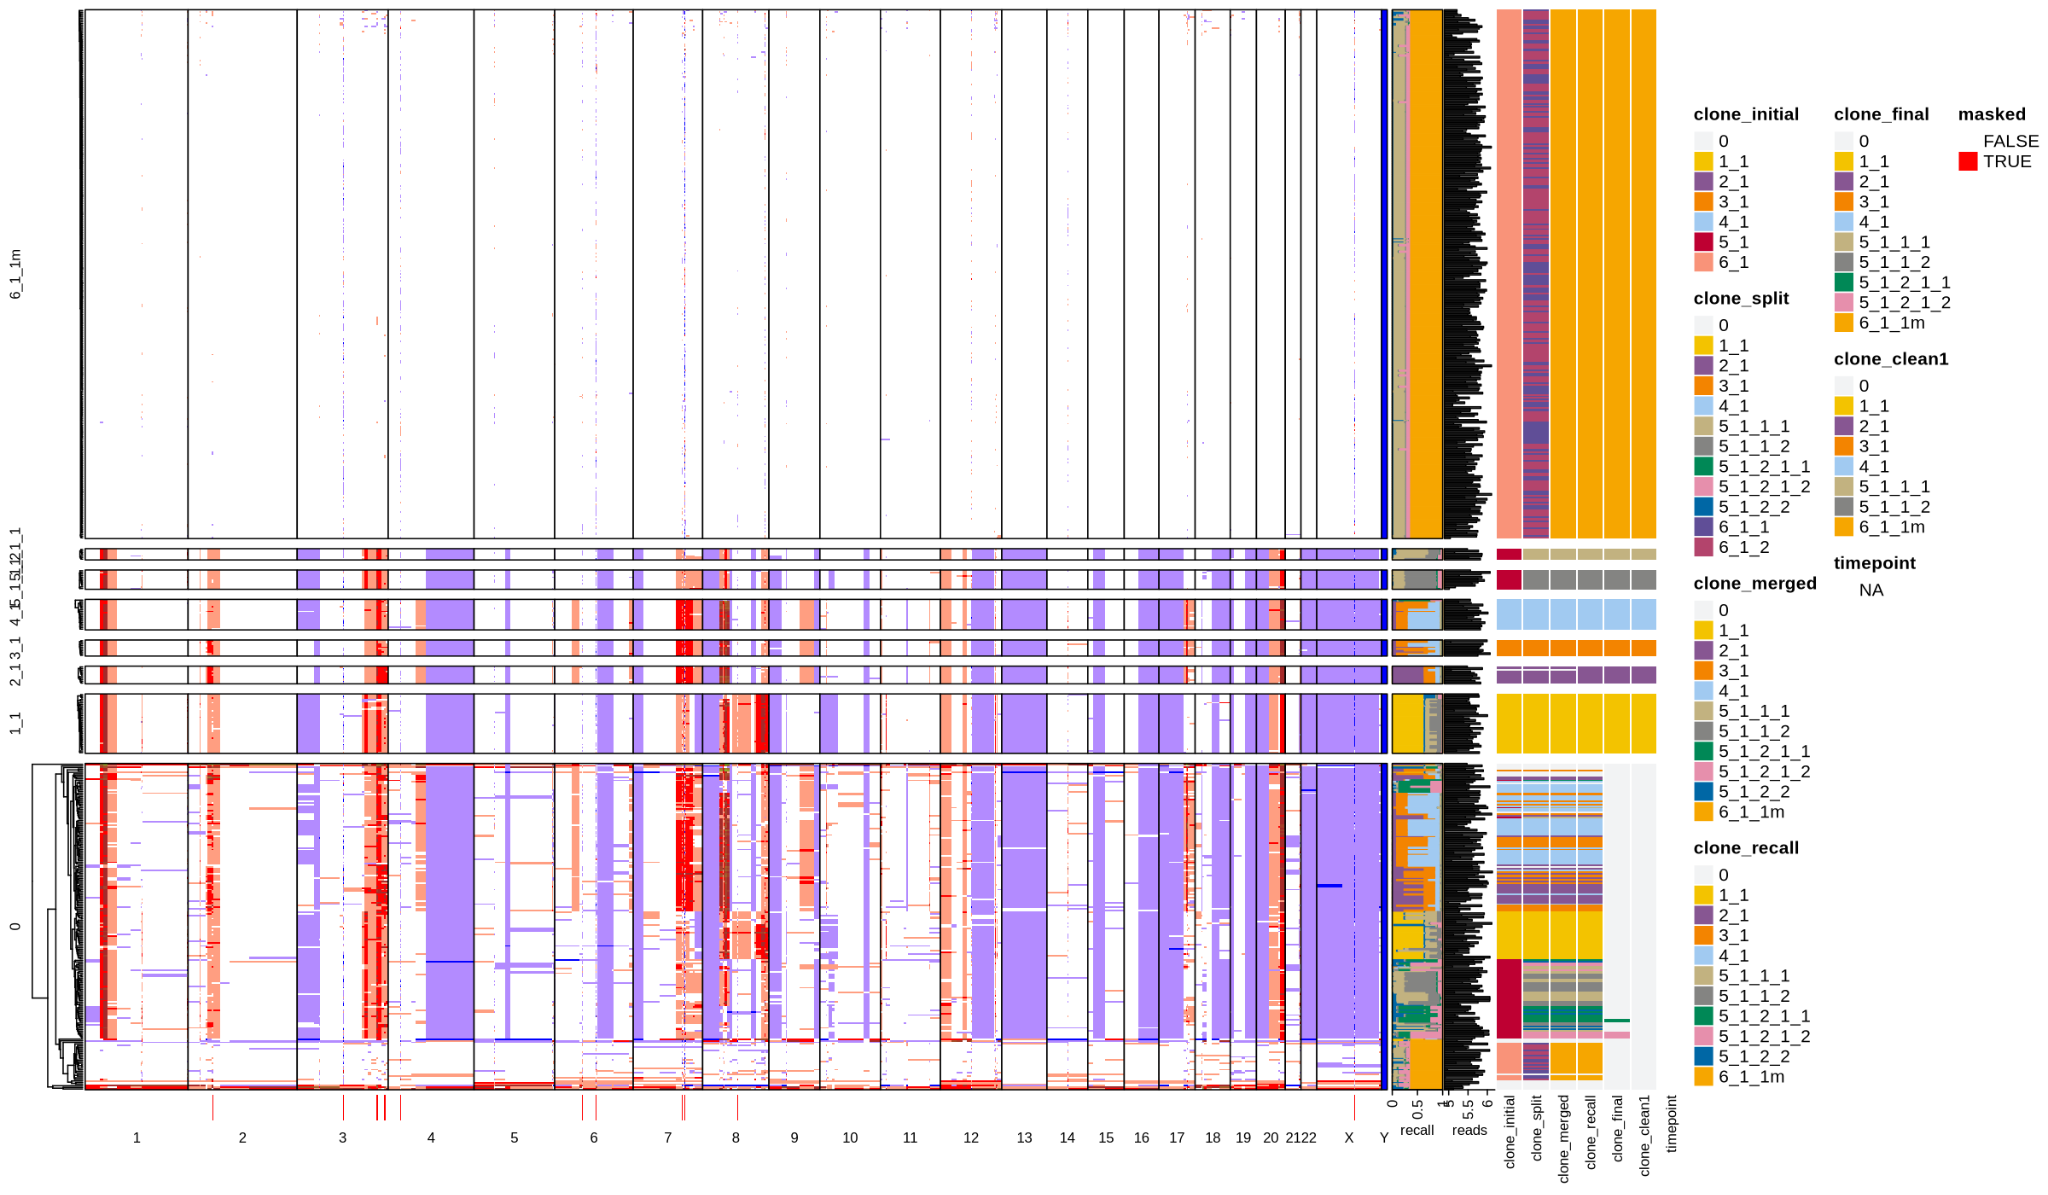


OC5


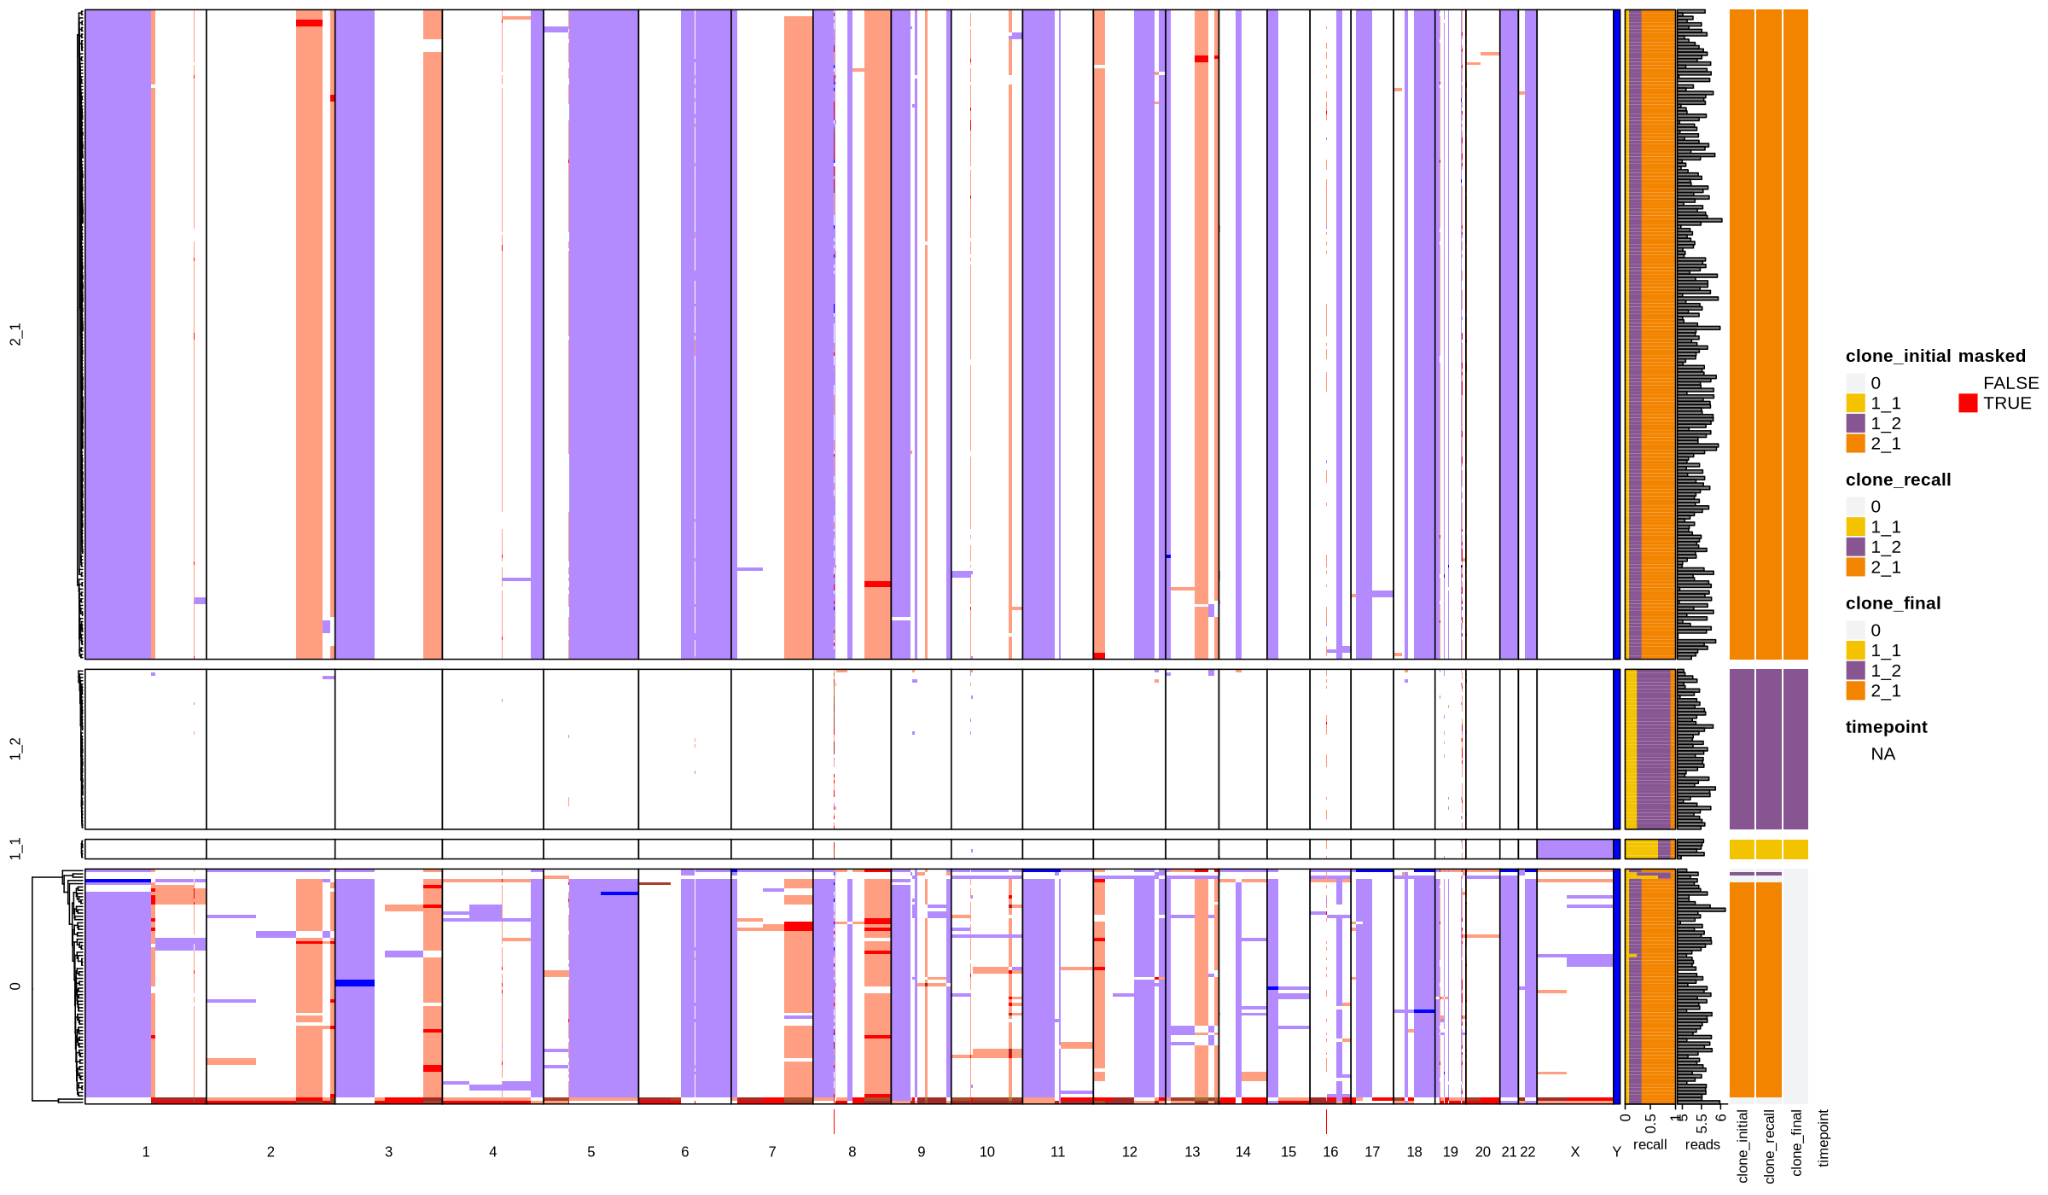


OC9


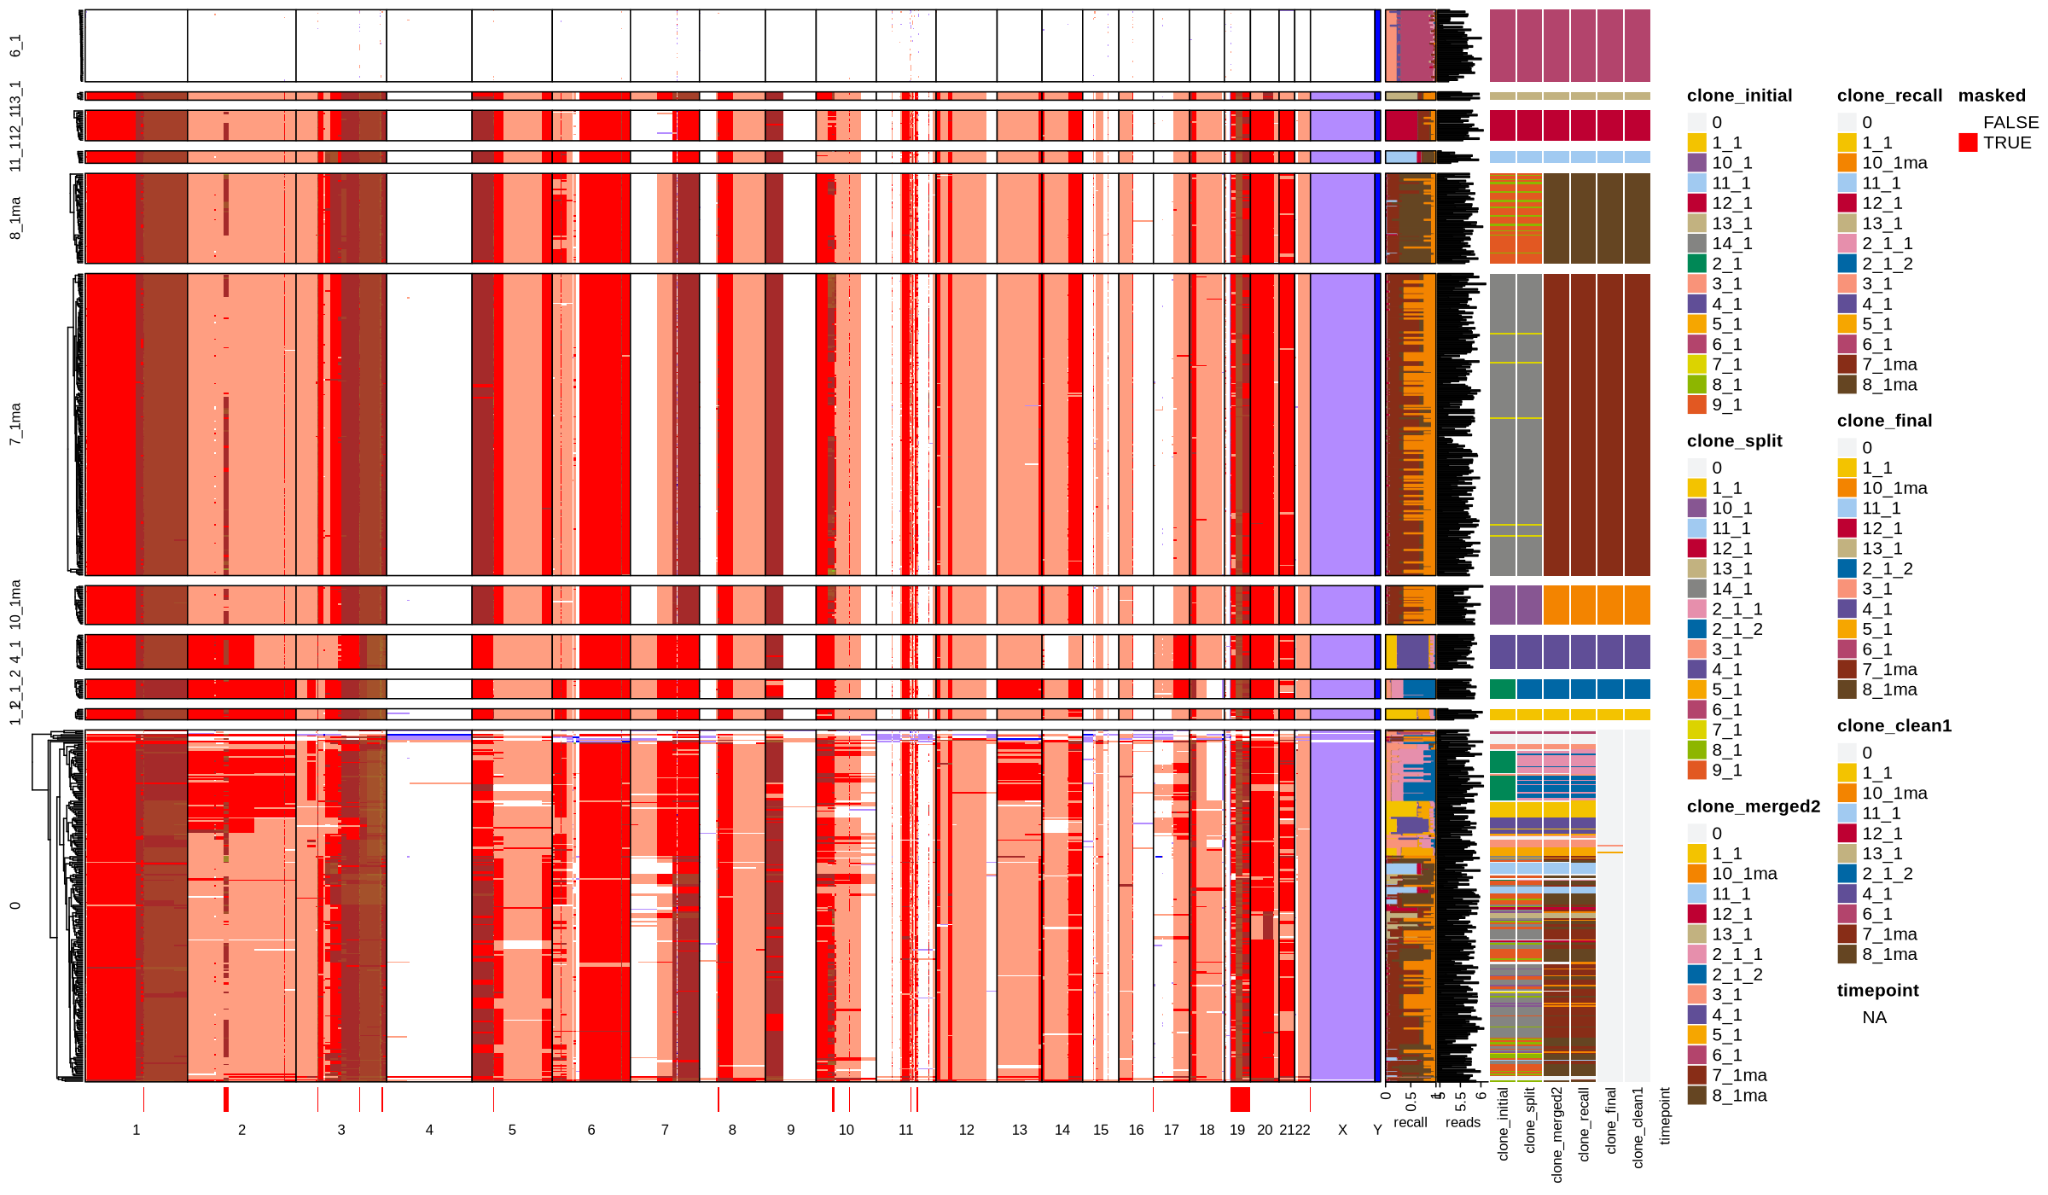


OC7


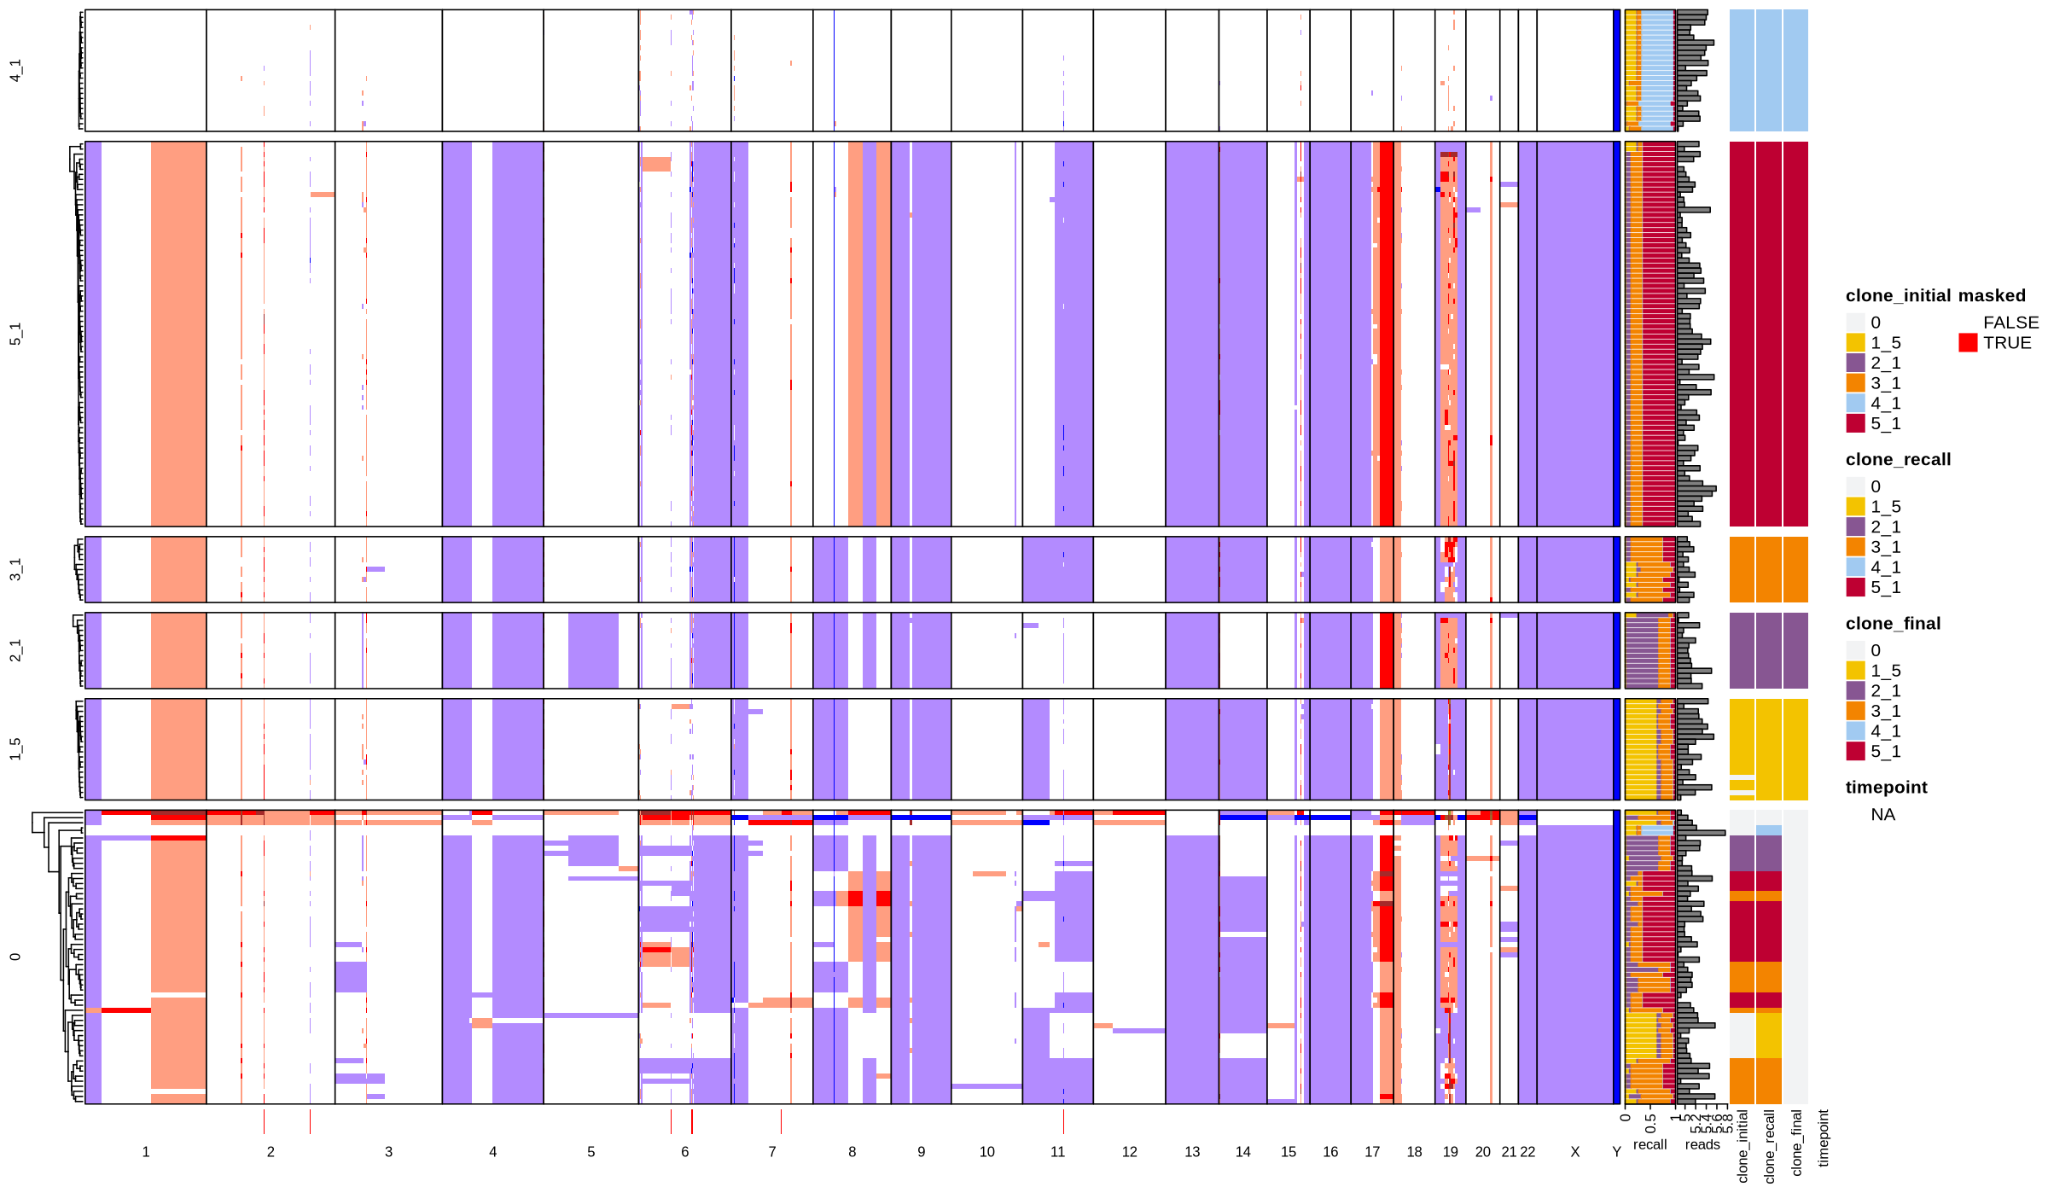


BC11


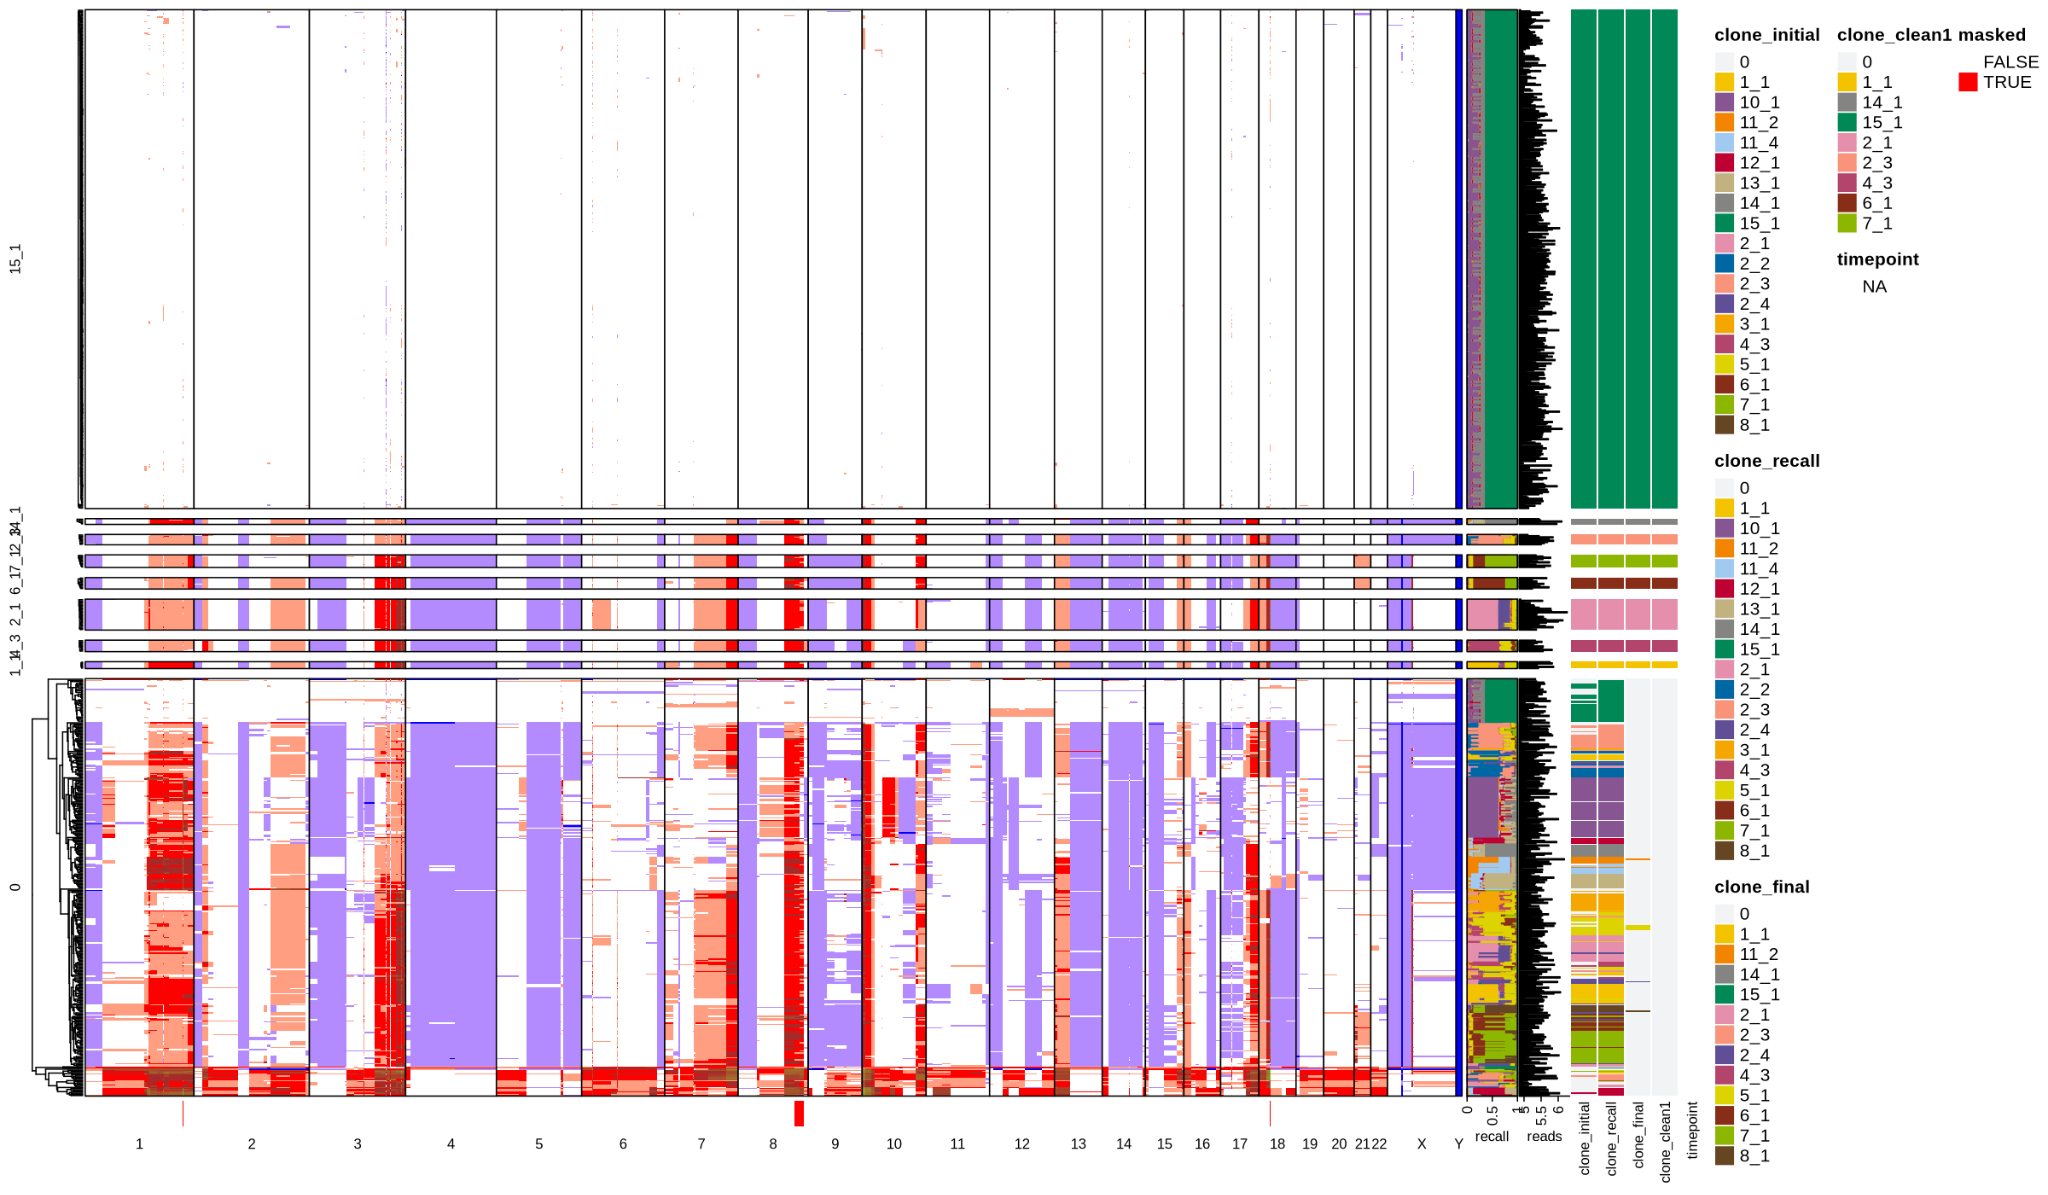


BC13


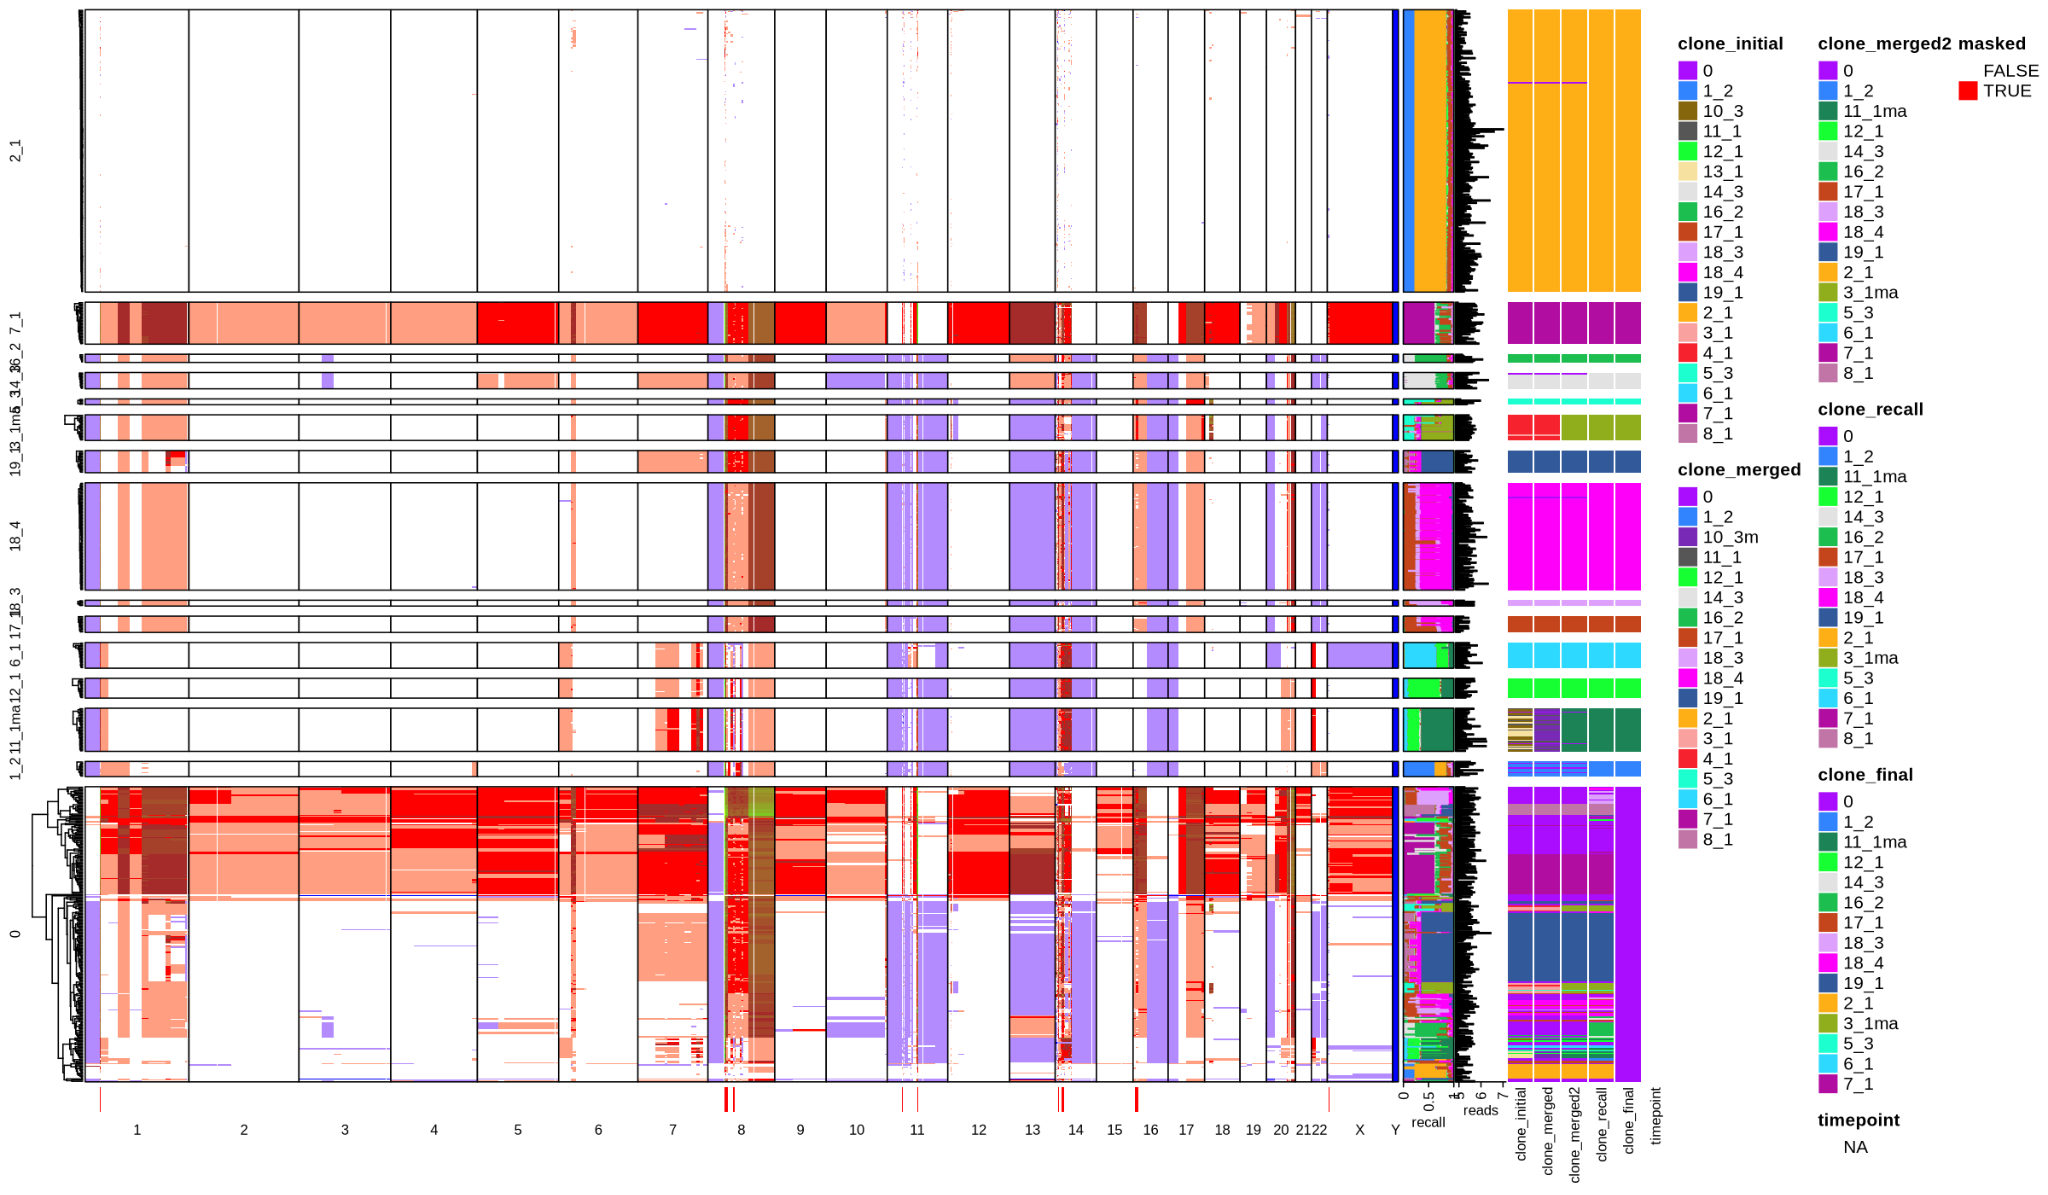


BC16


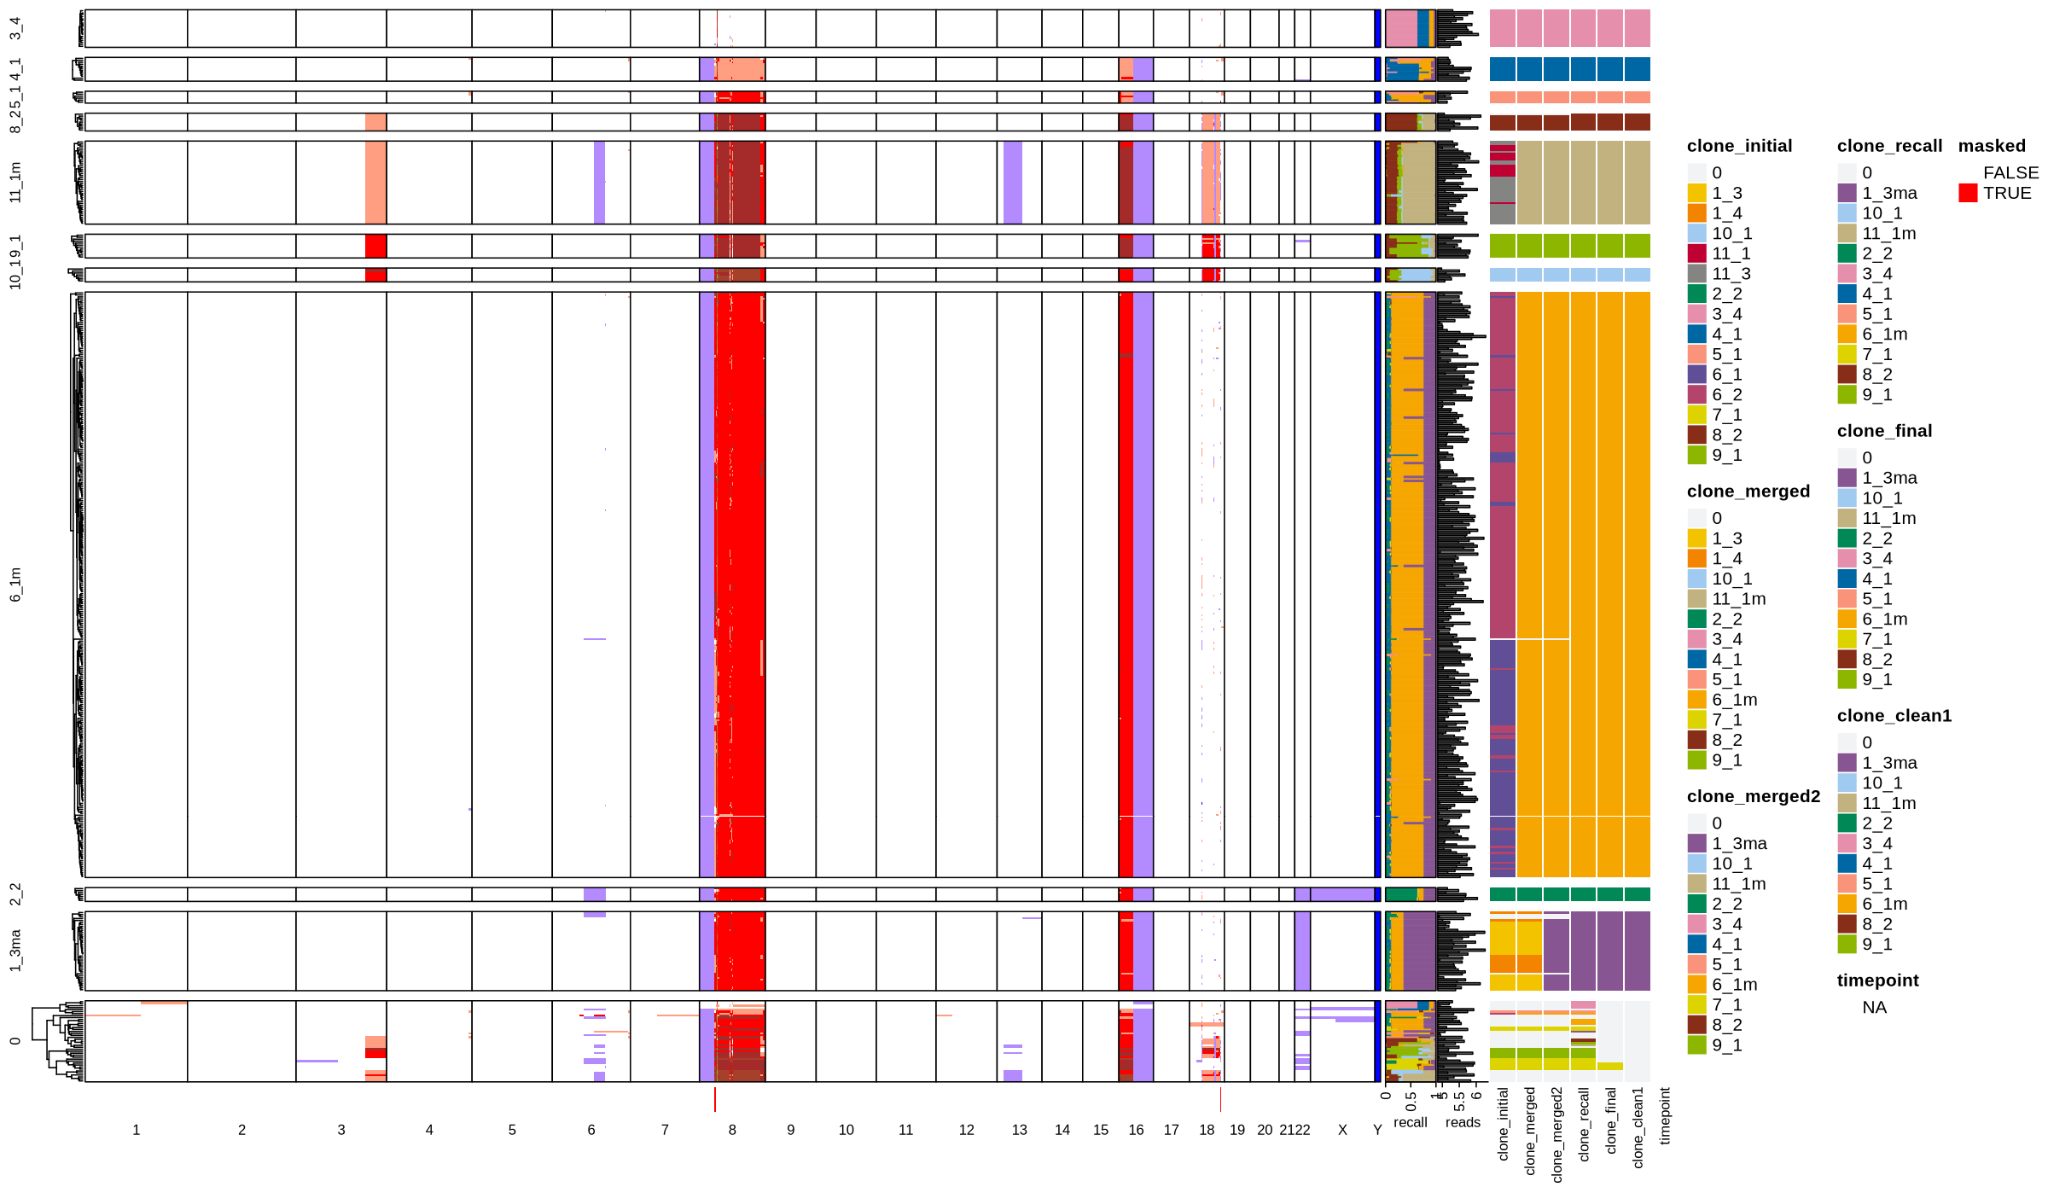


BC19


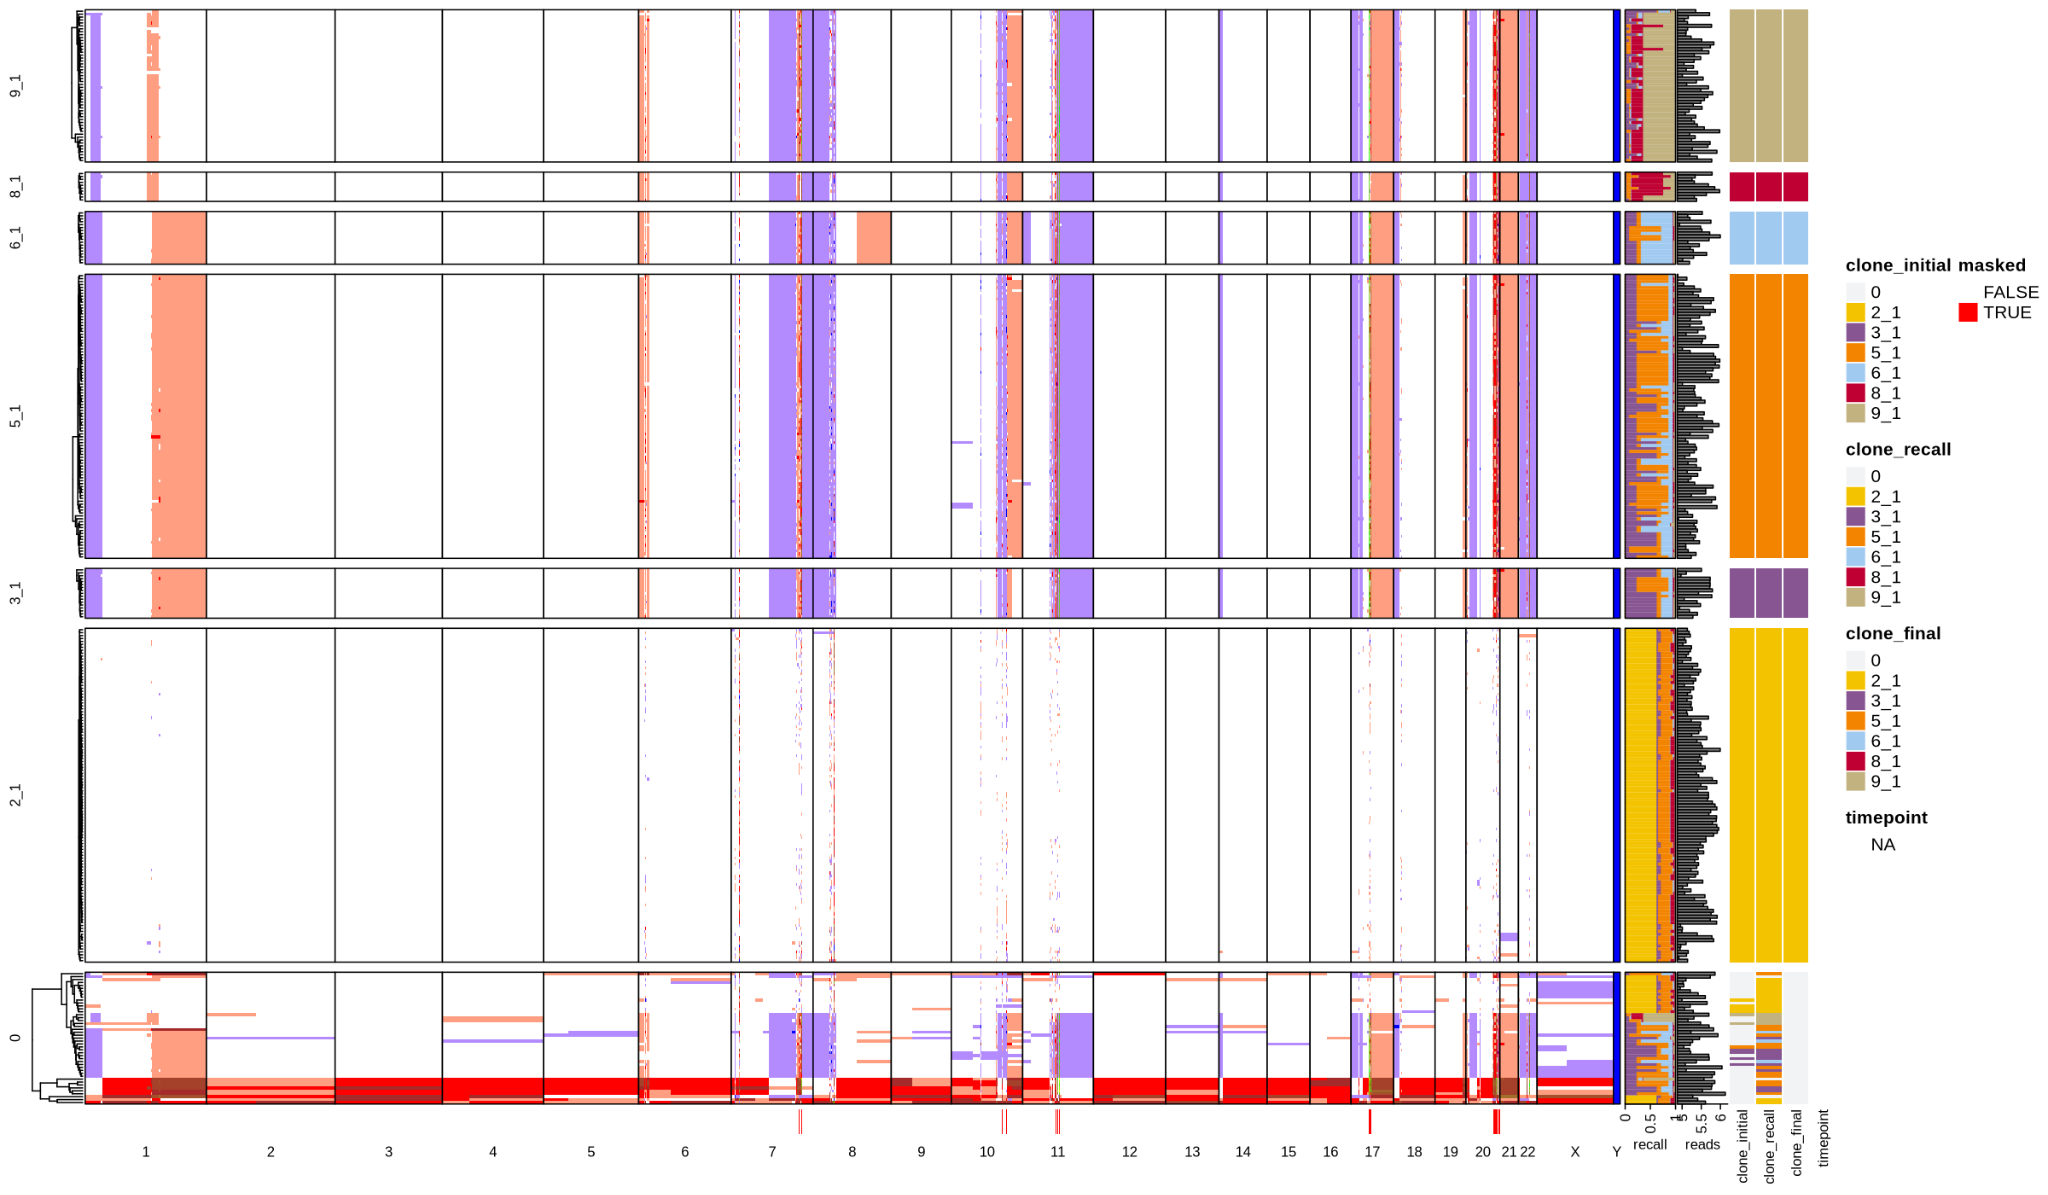


BC20


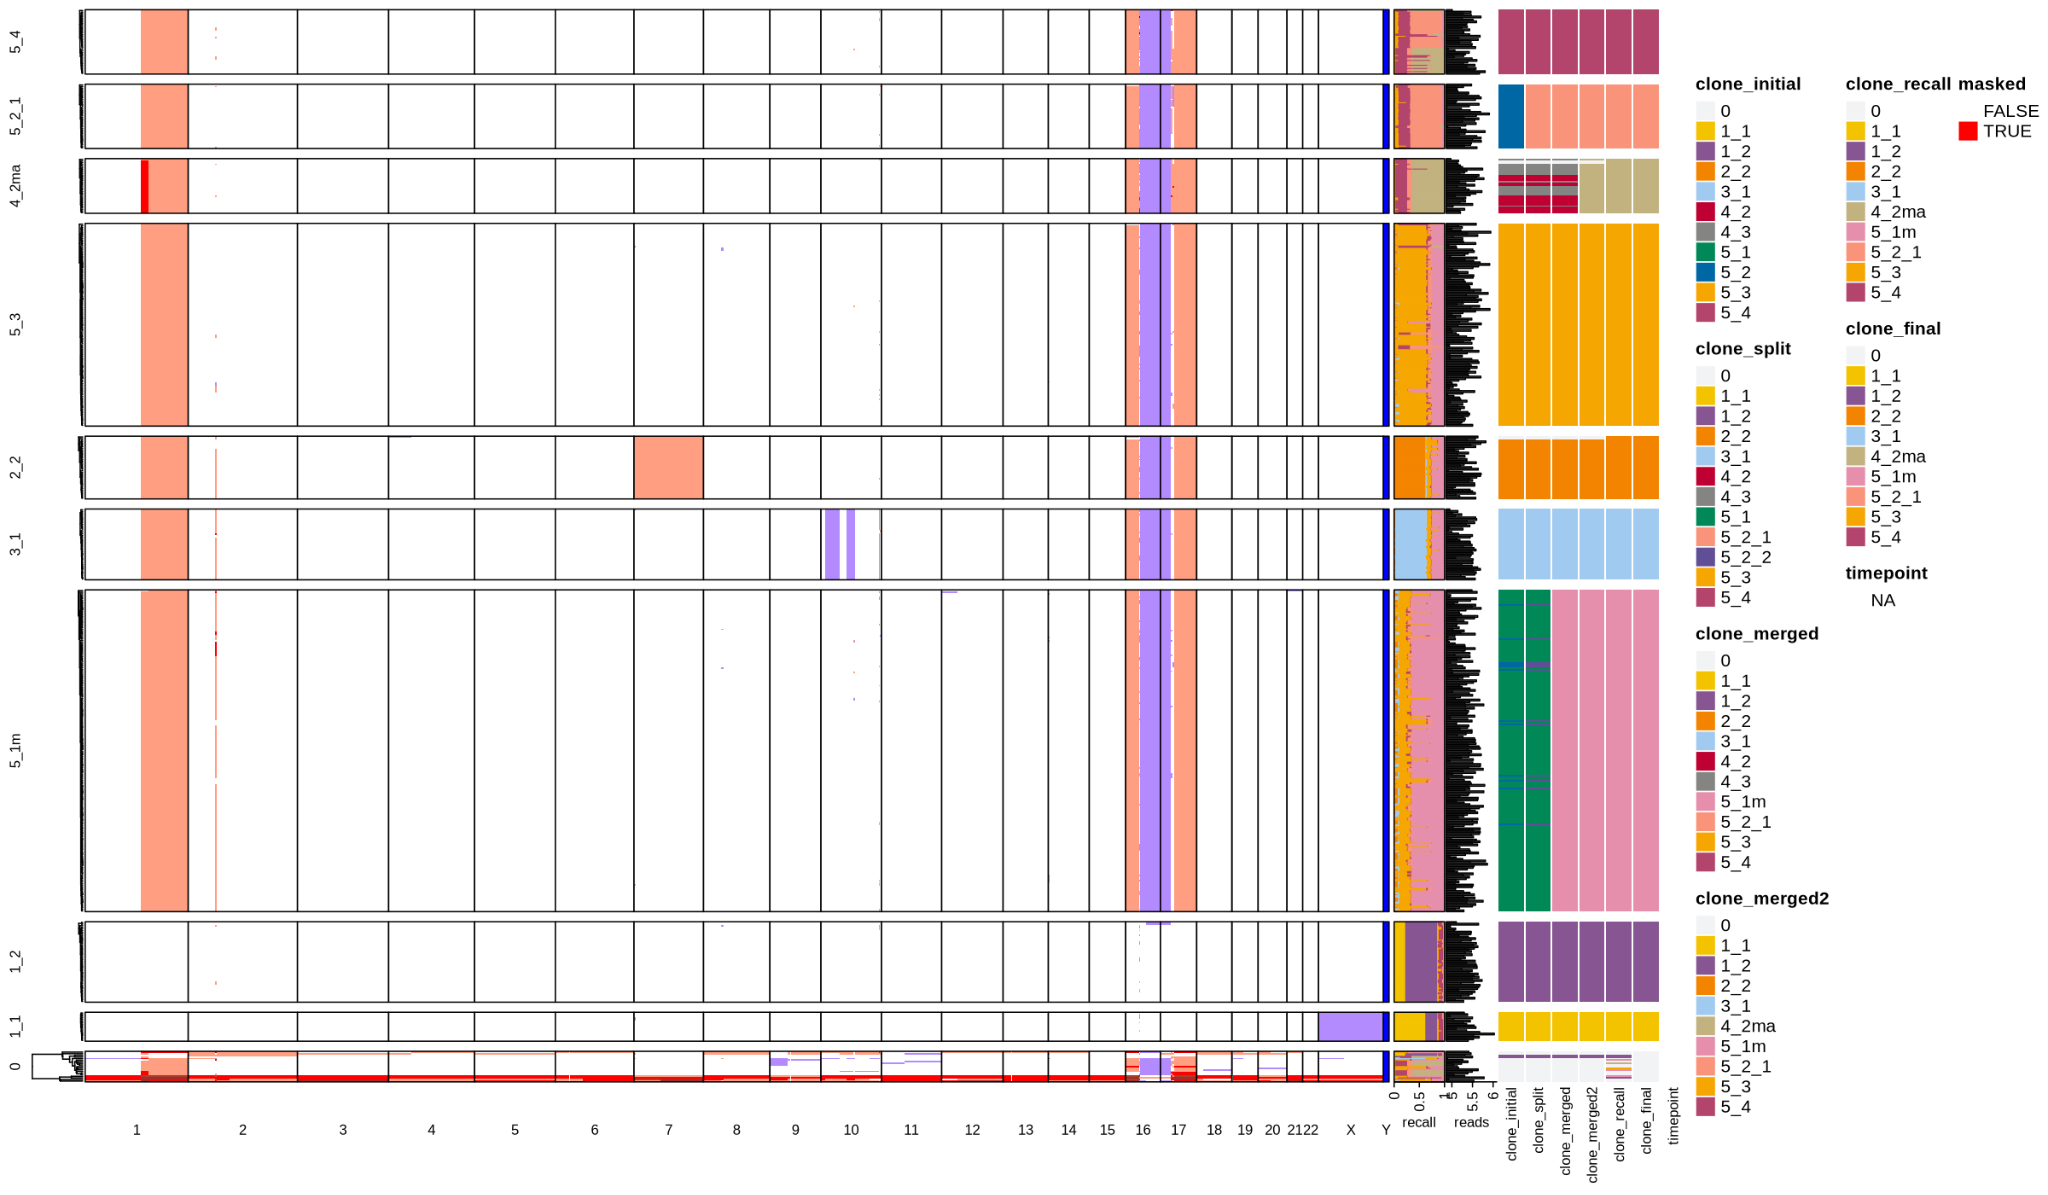


BC26


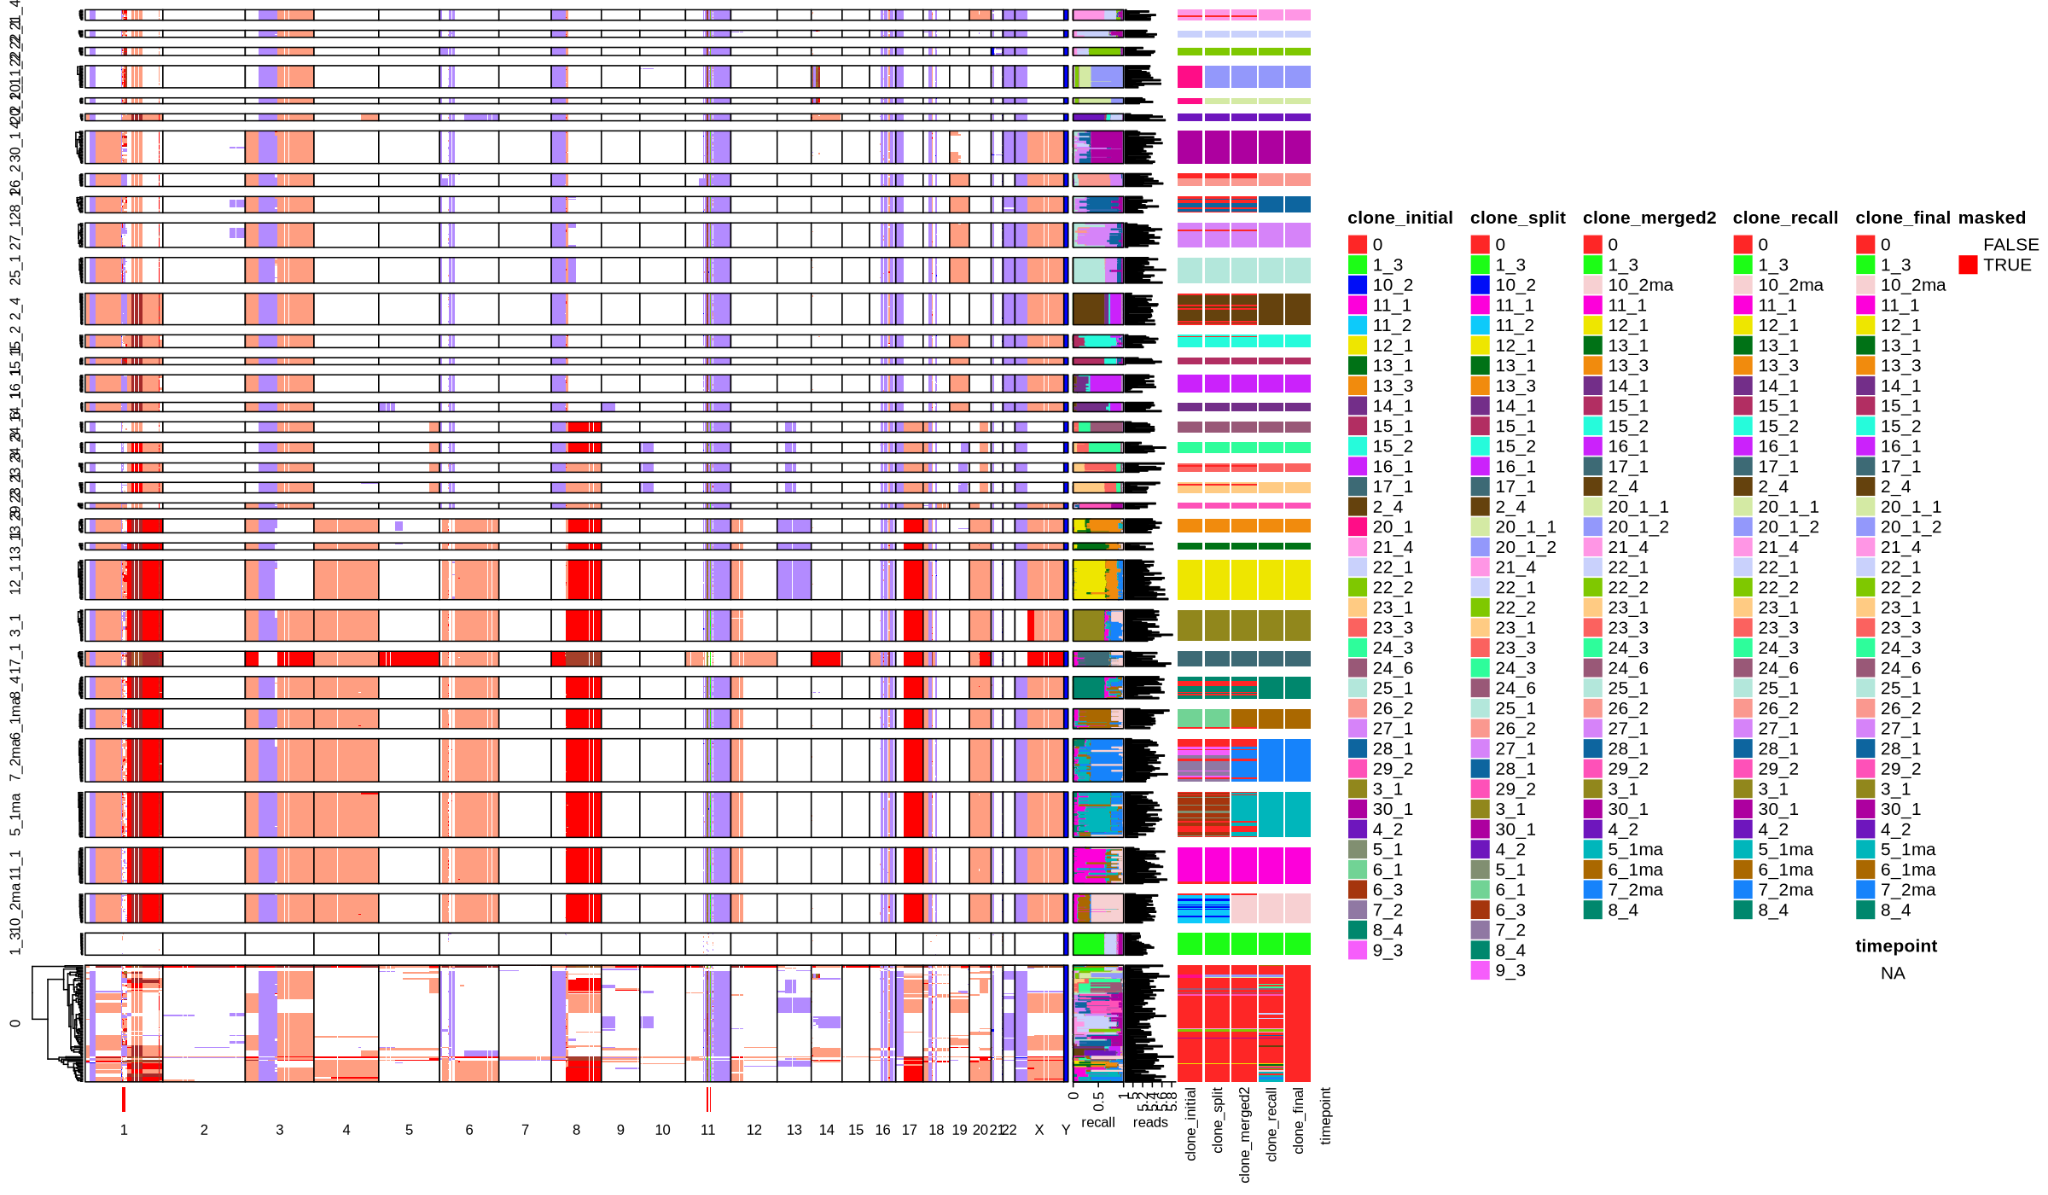


BC28


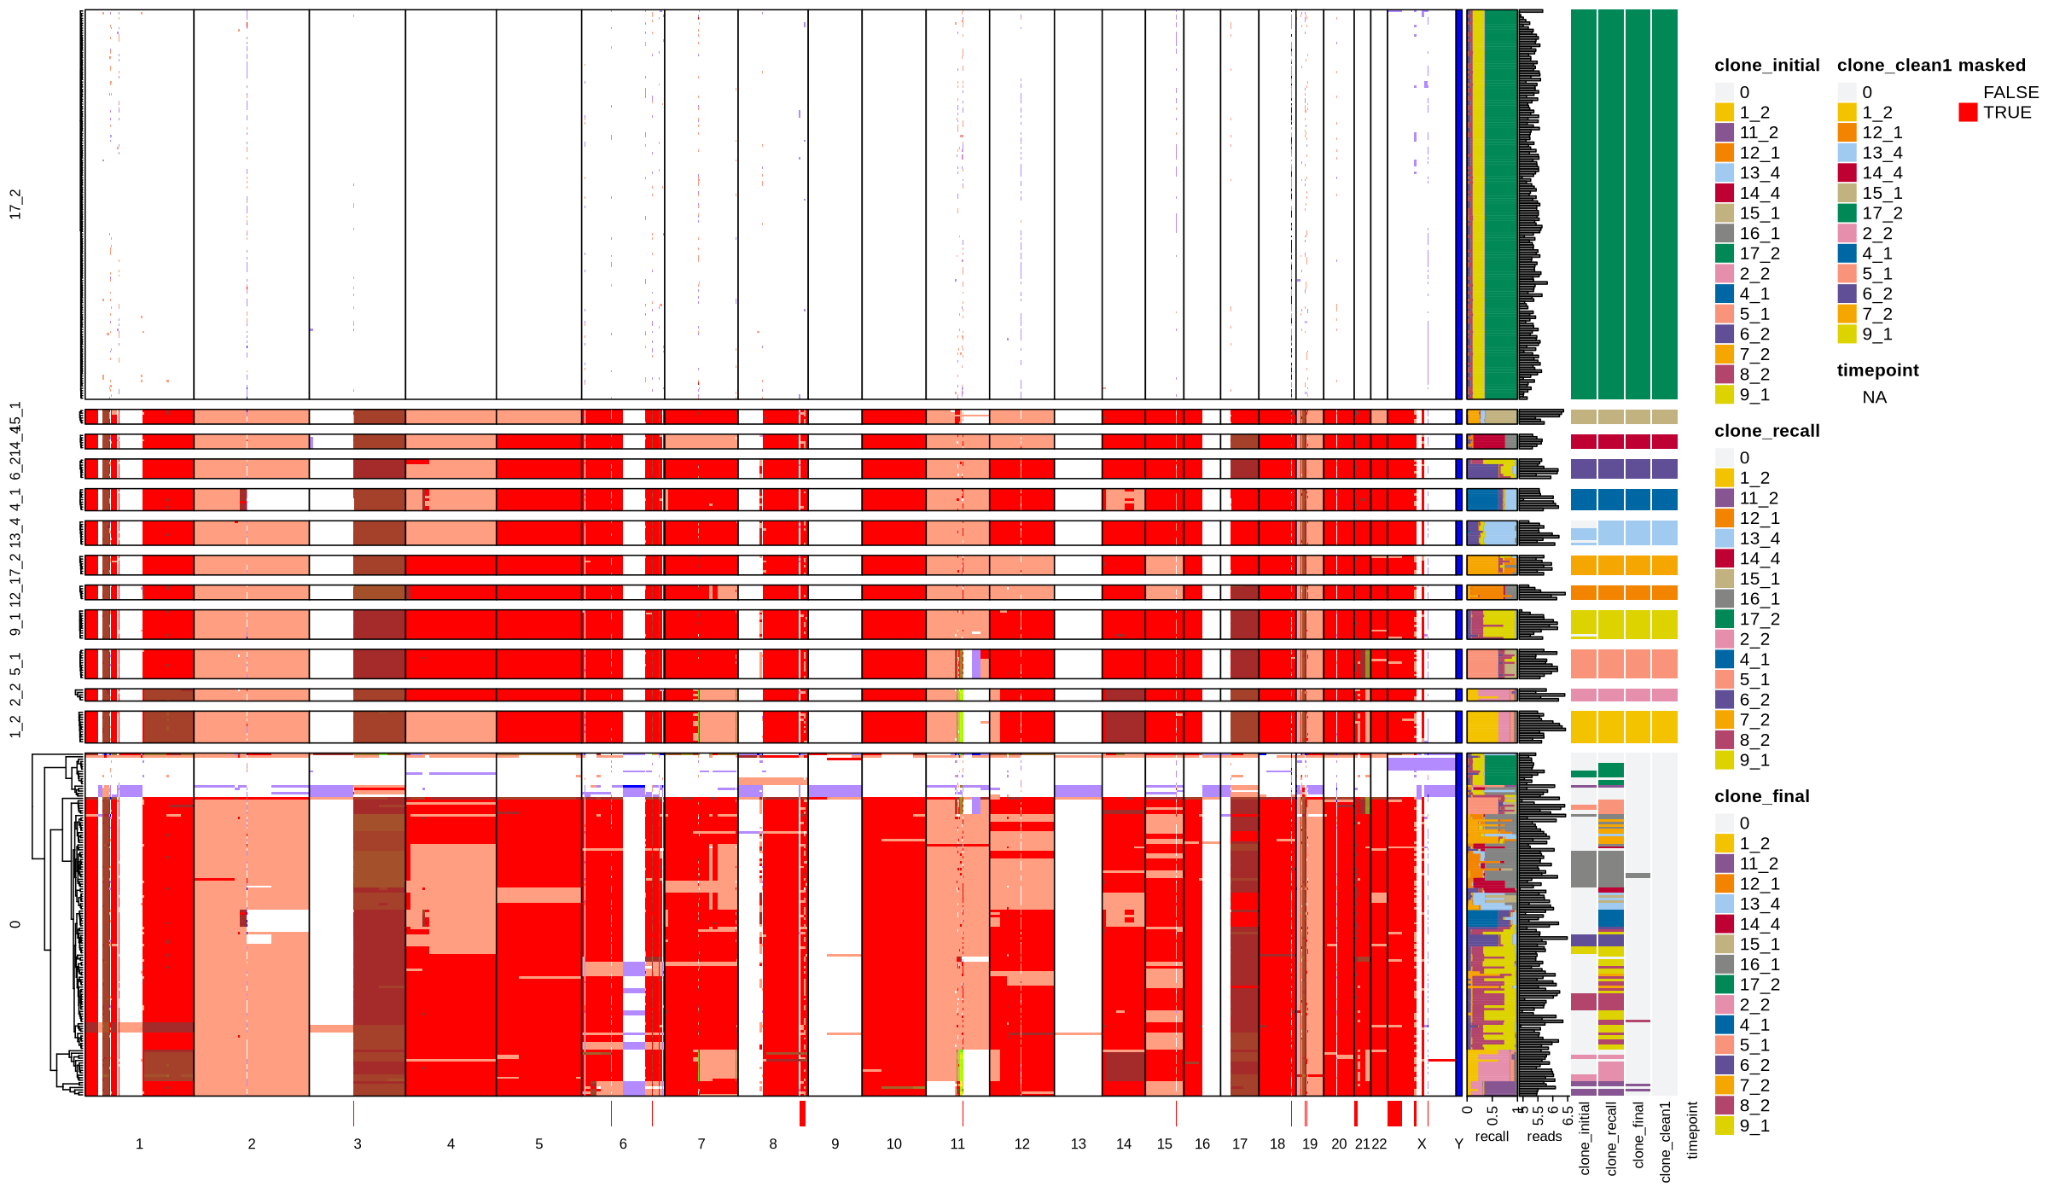


BC30


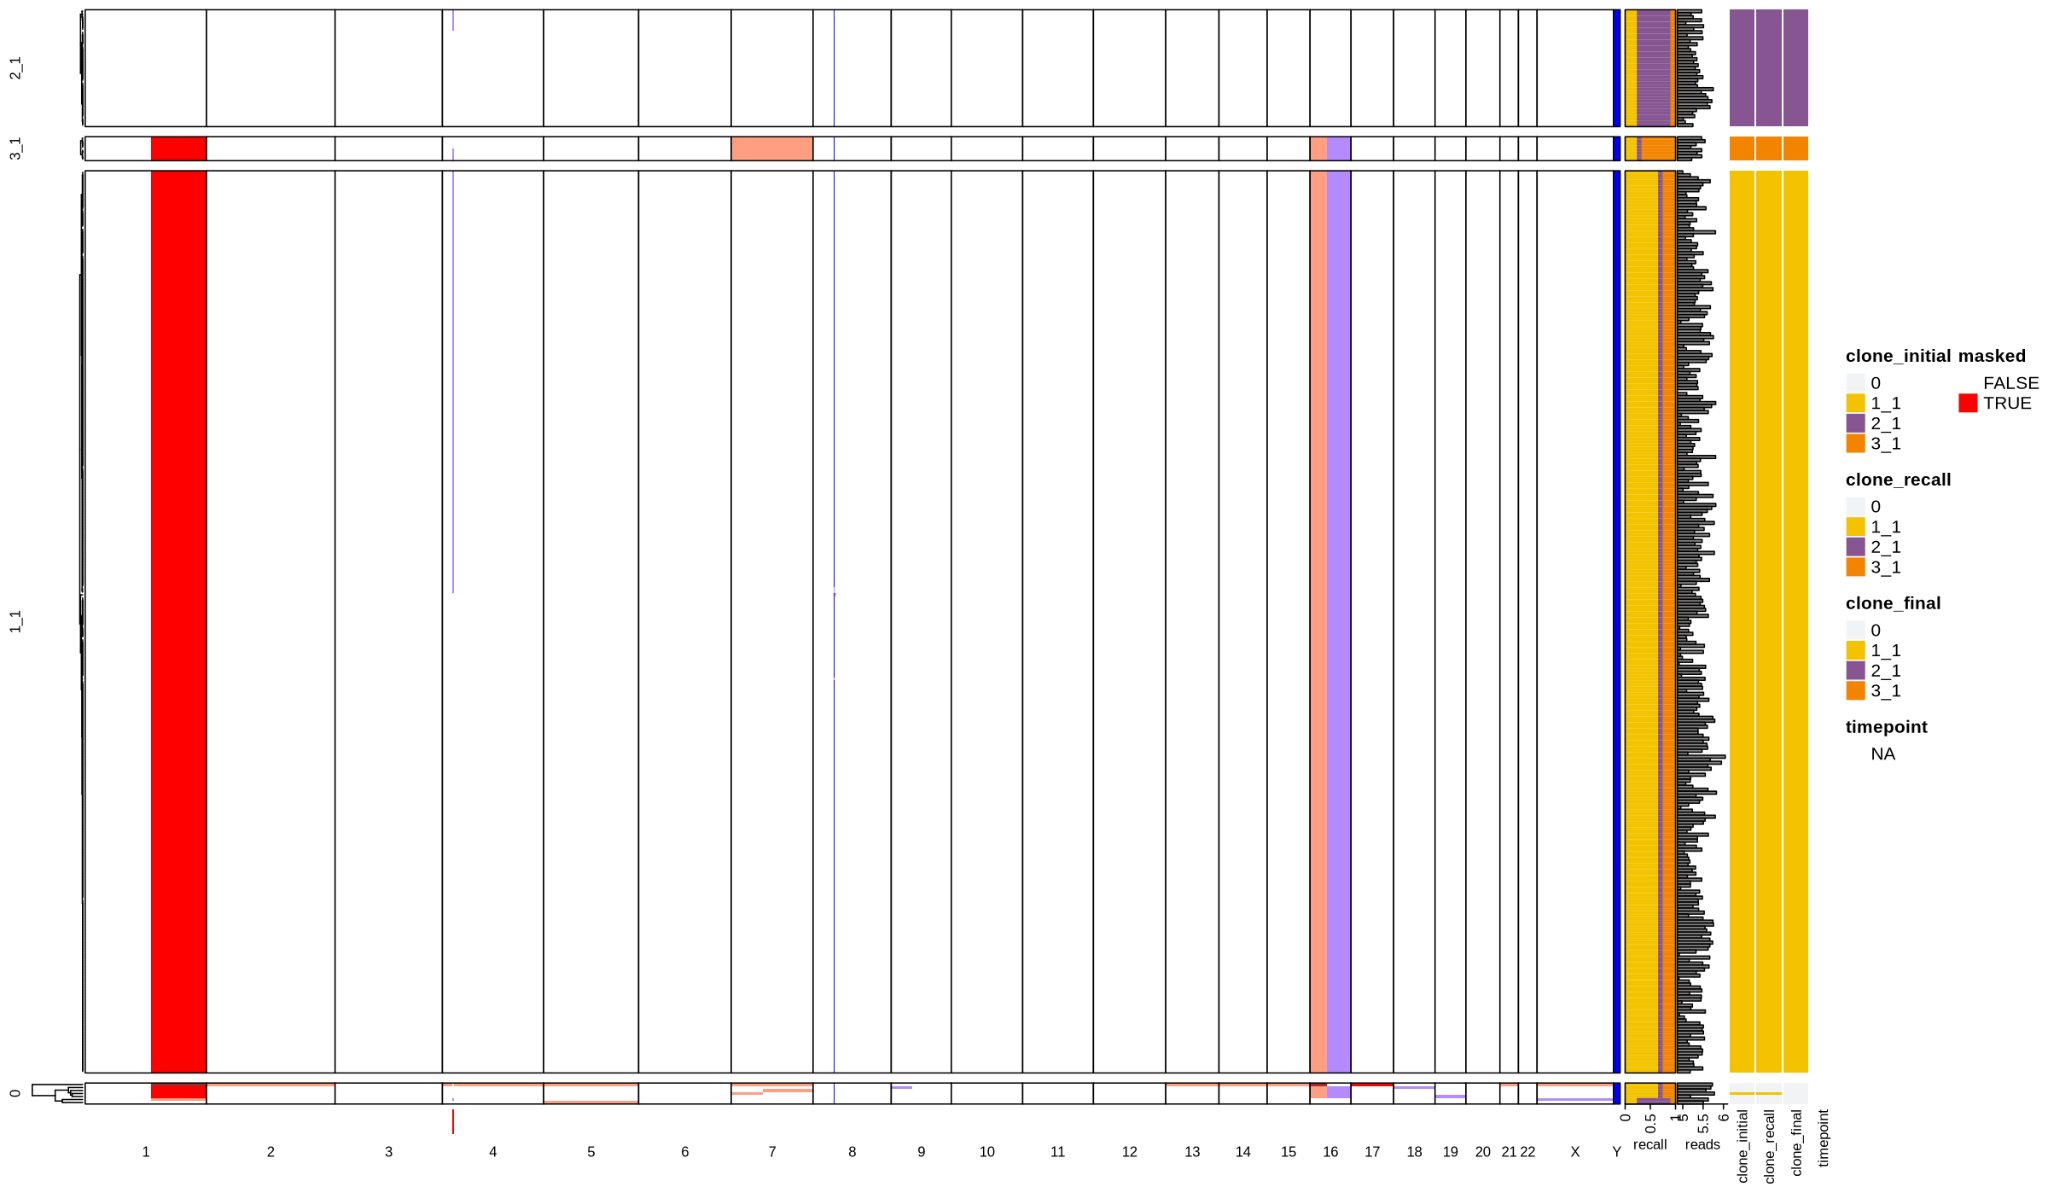


BC38


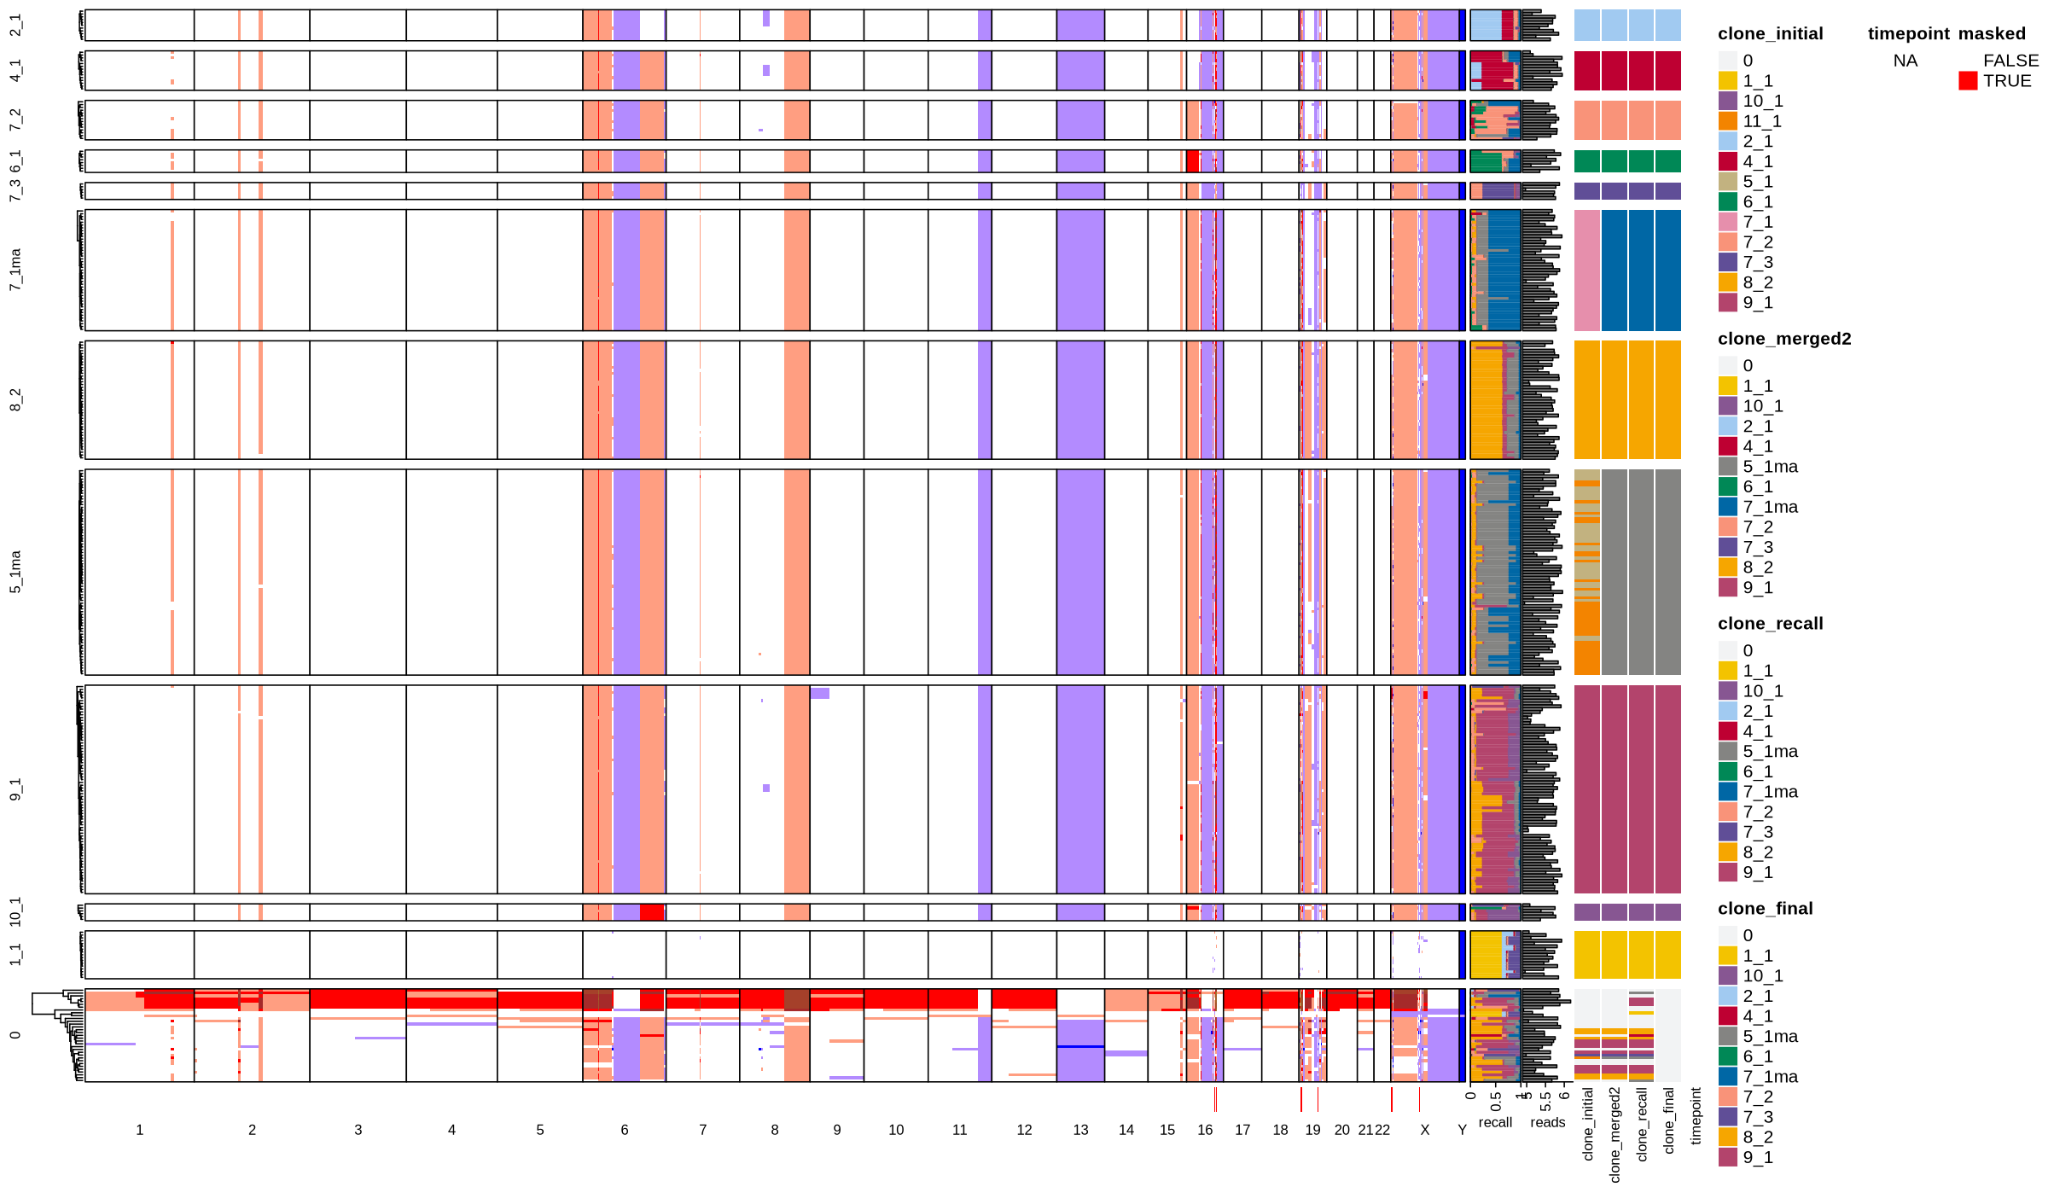


MEL1


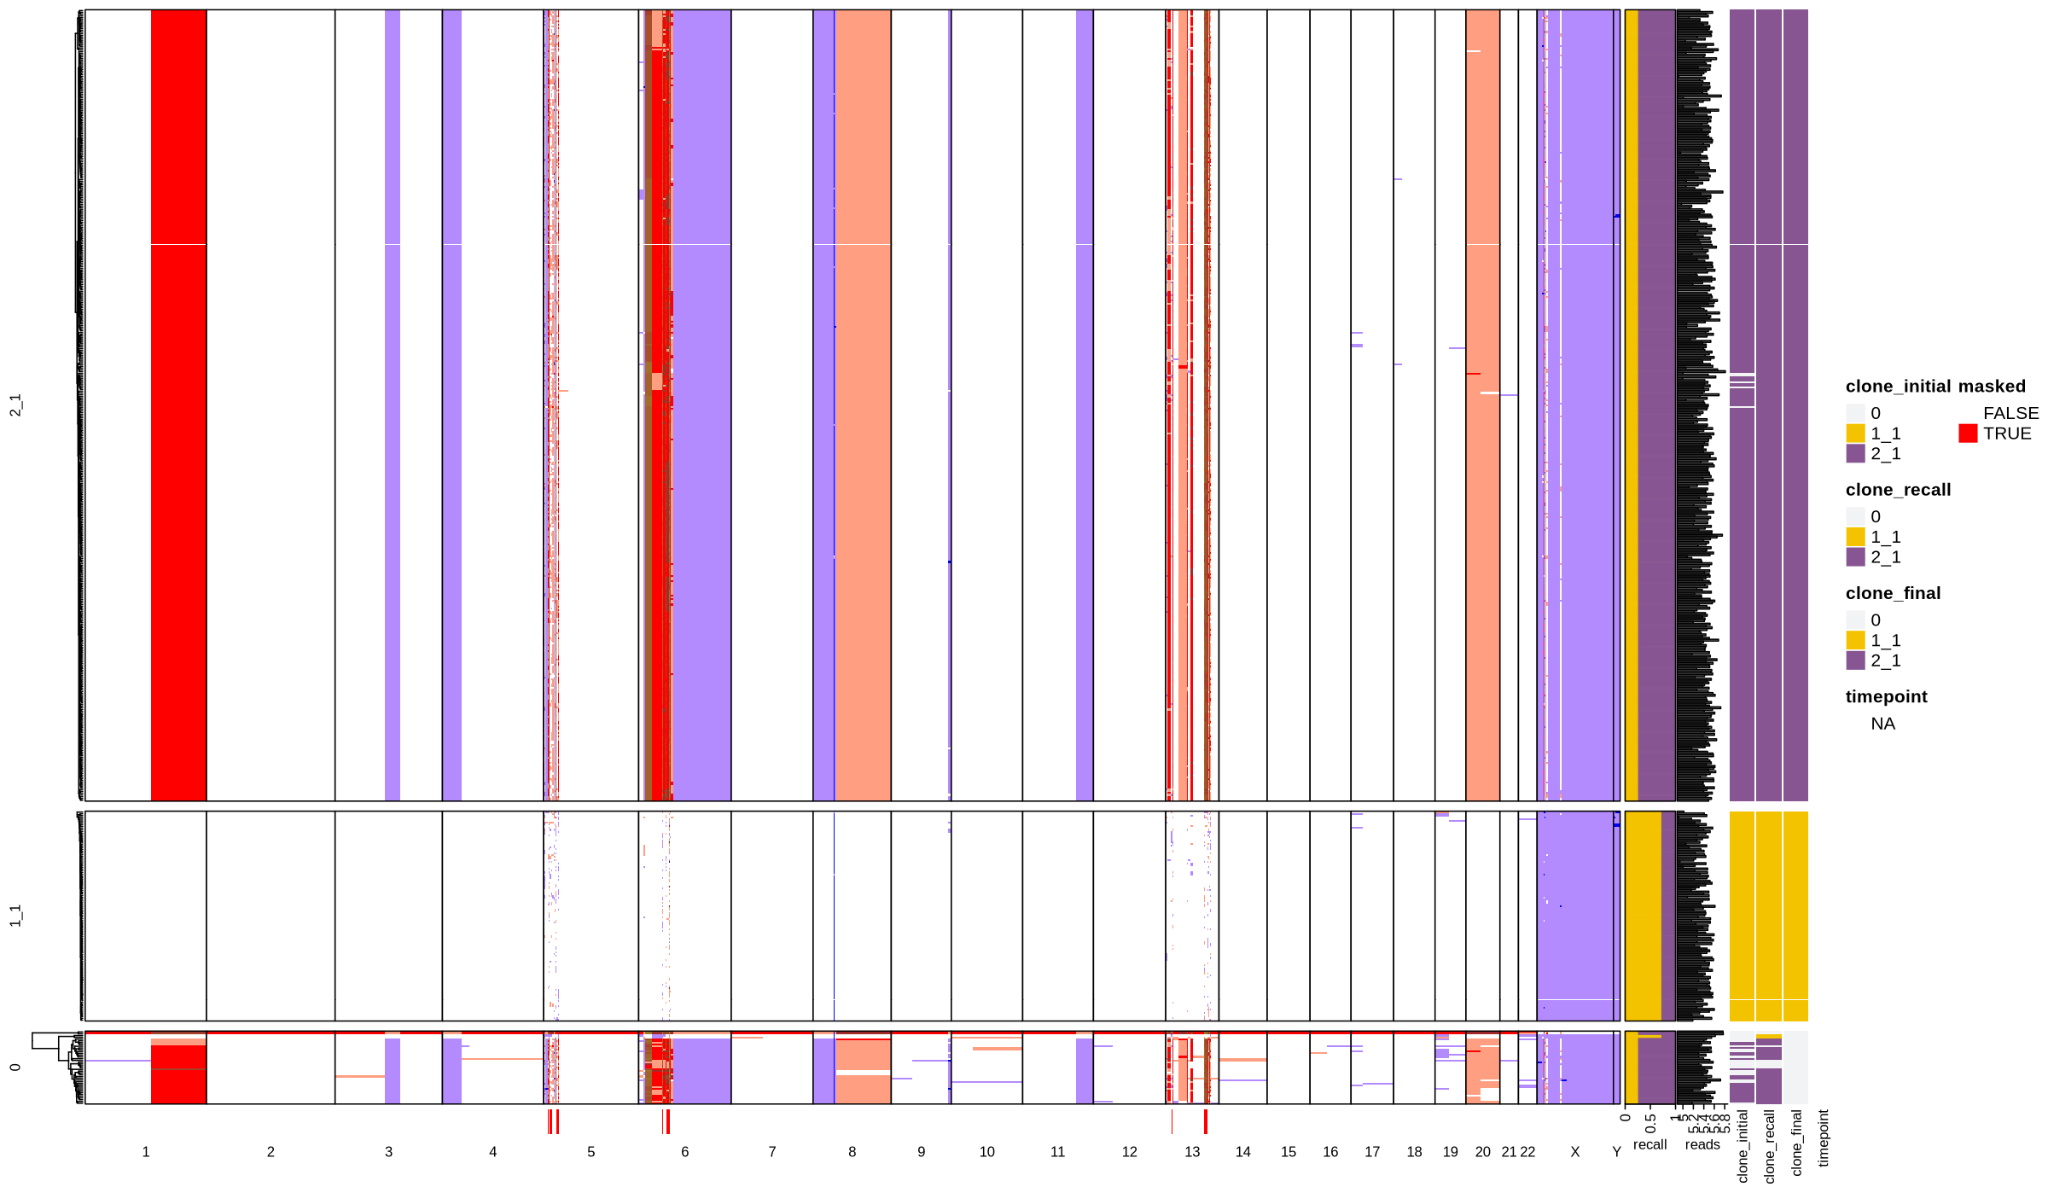


MEL2


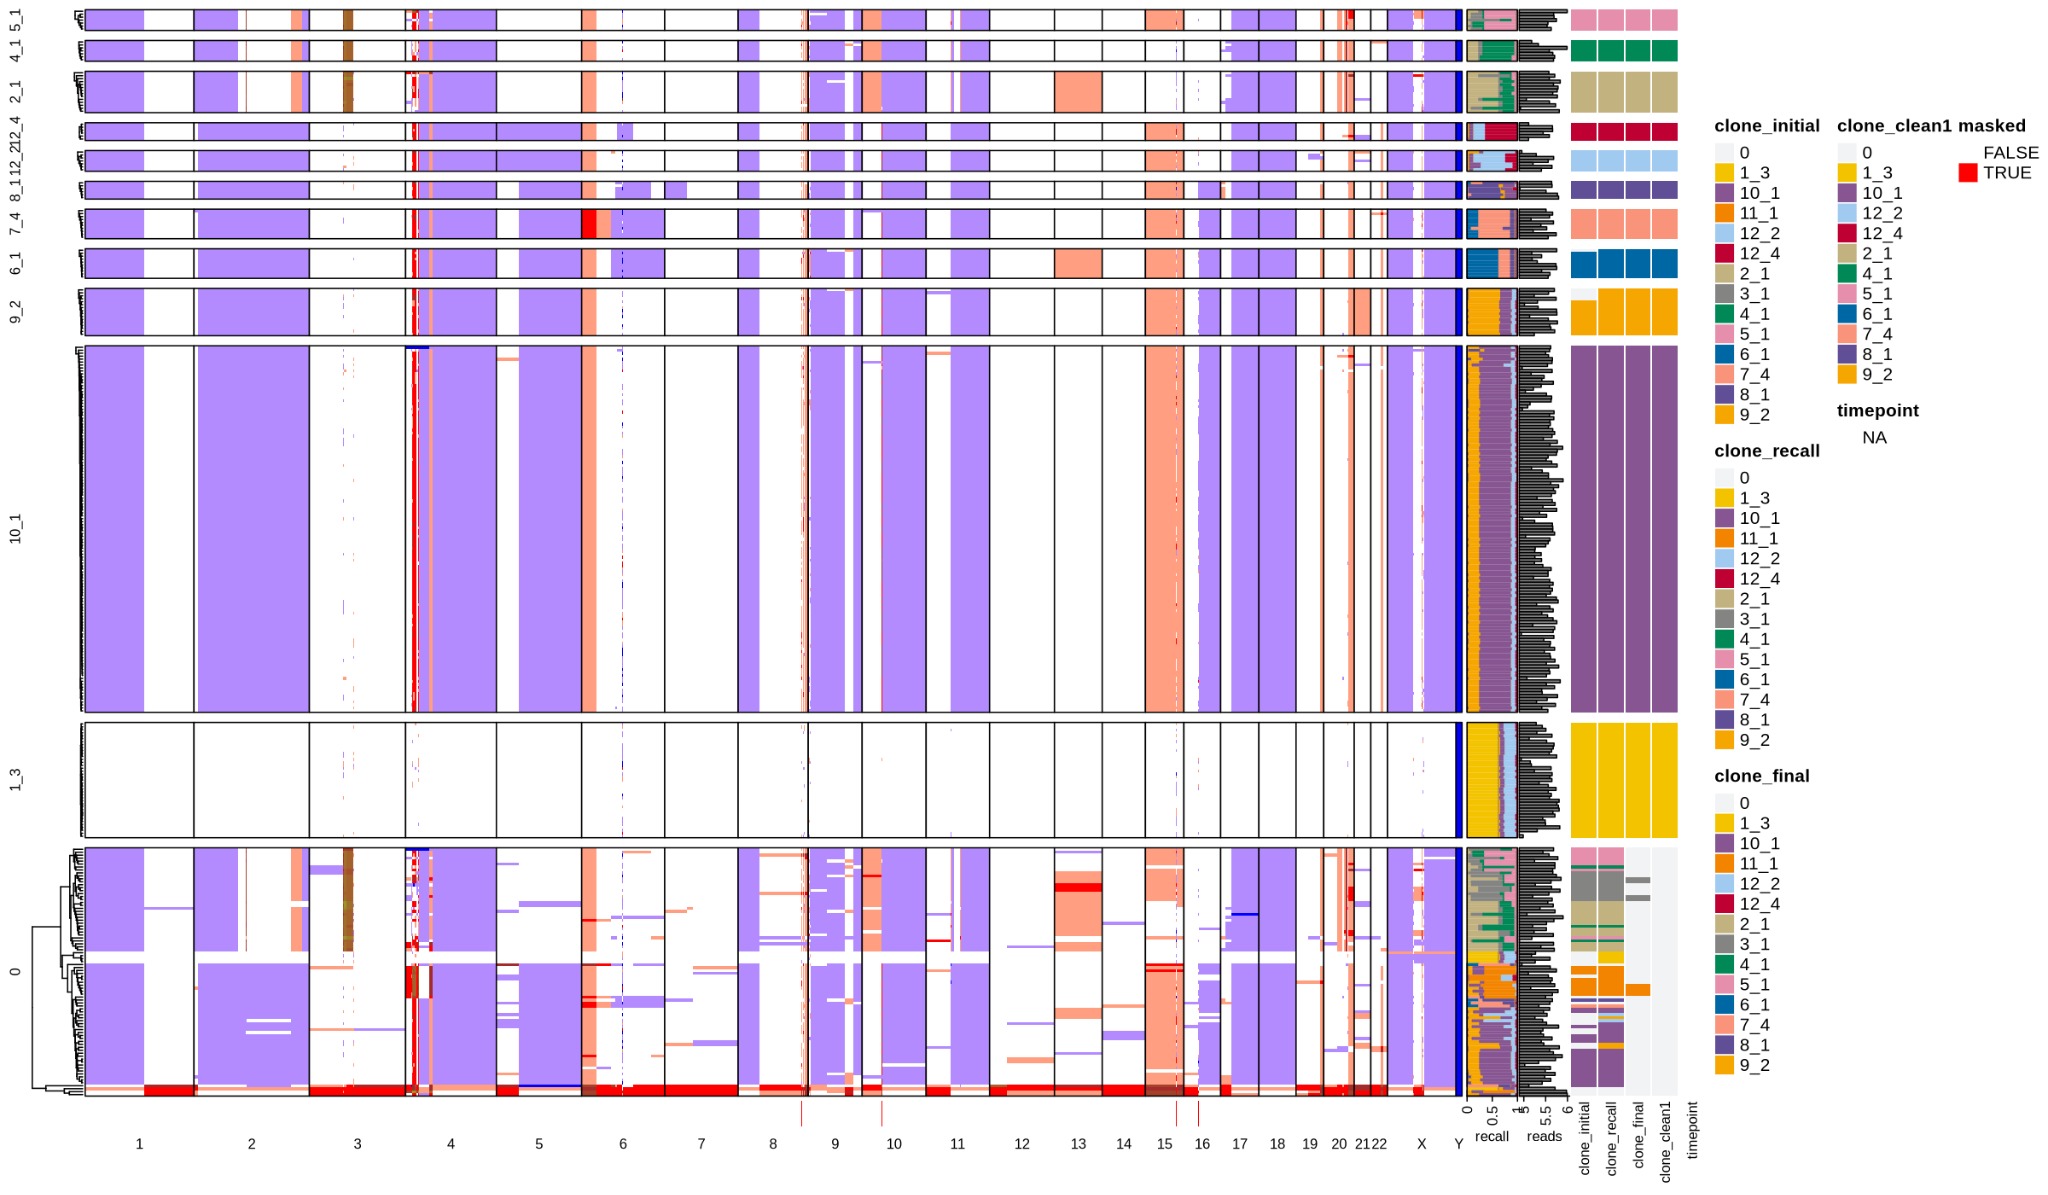


MEL3


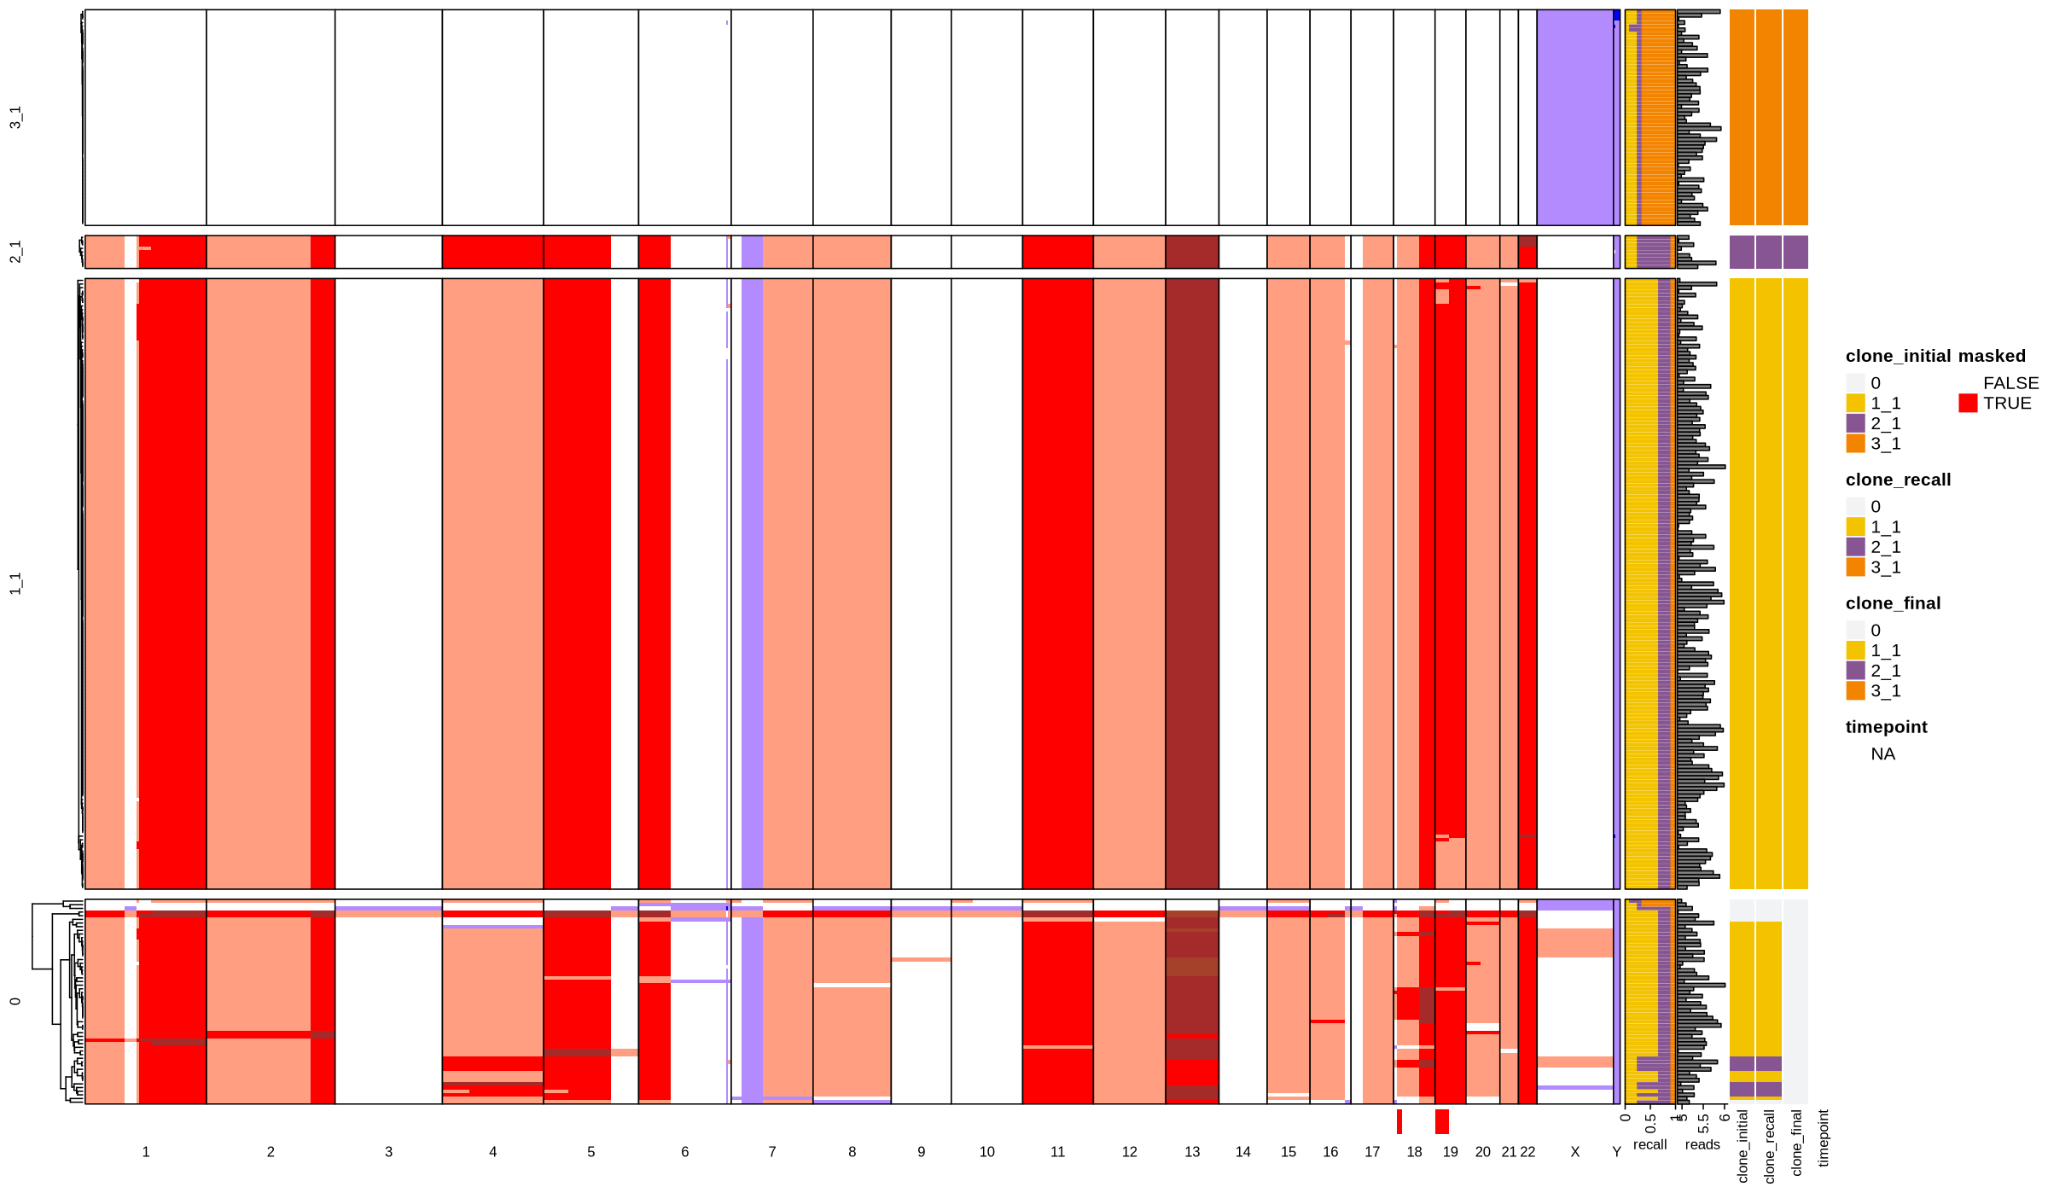


MEL4


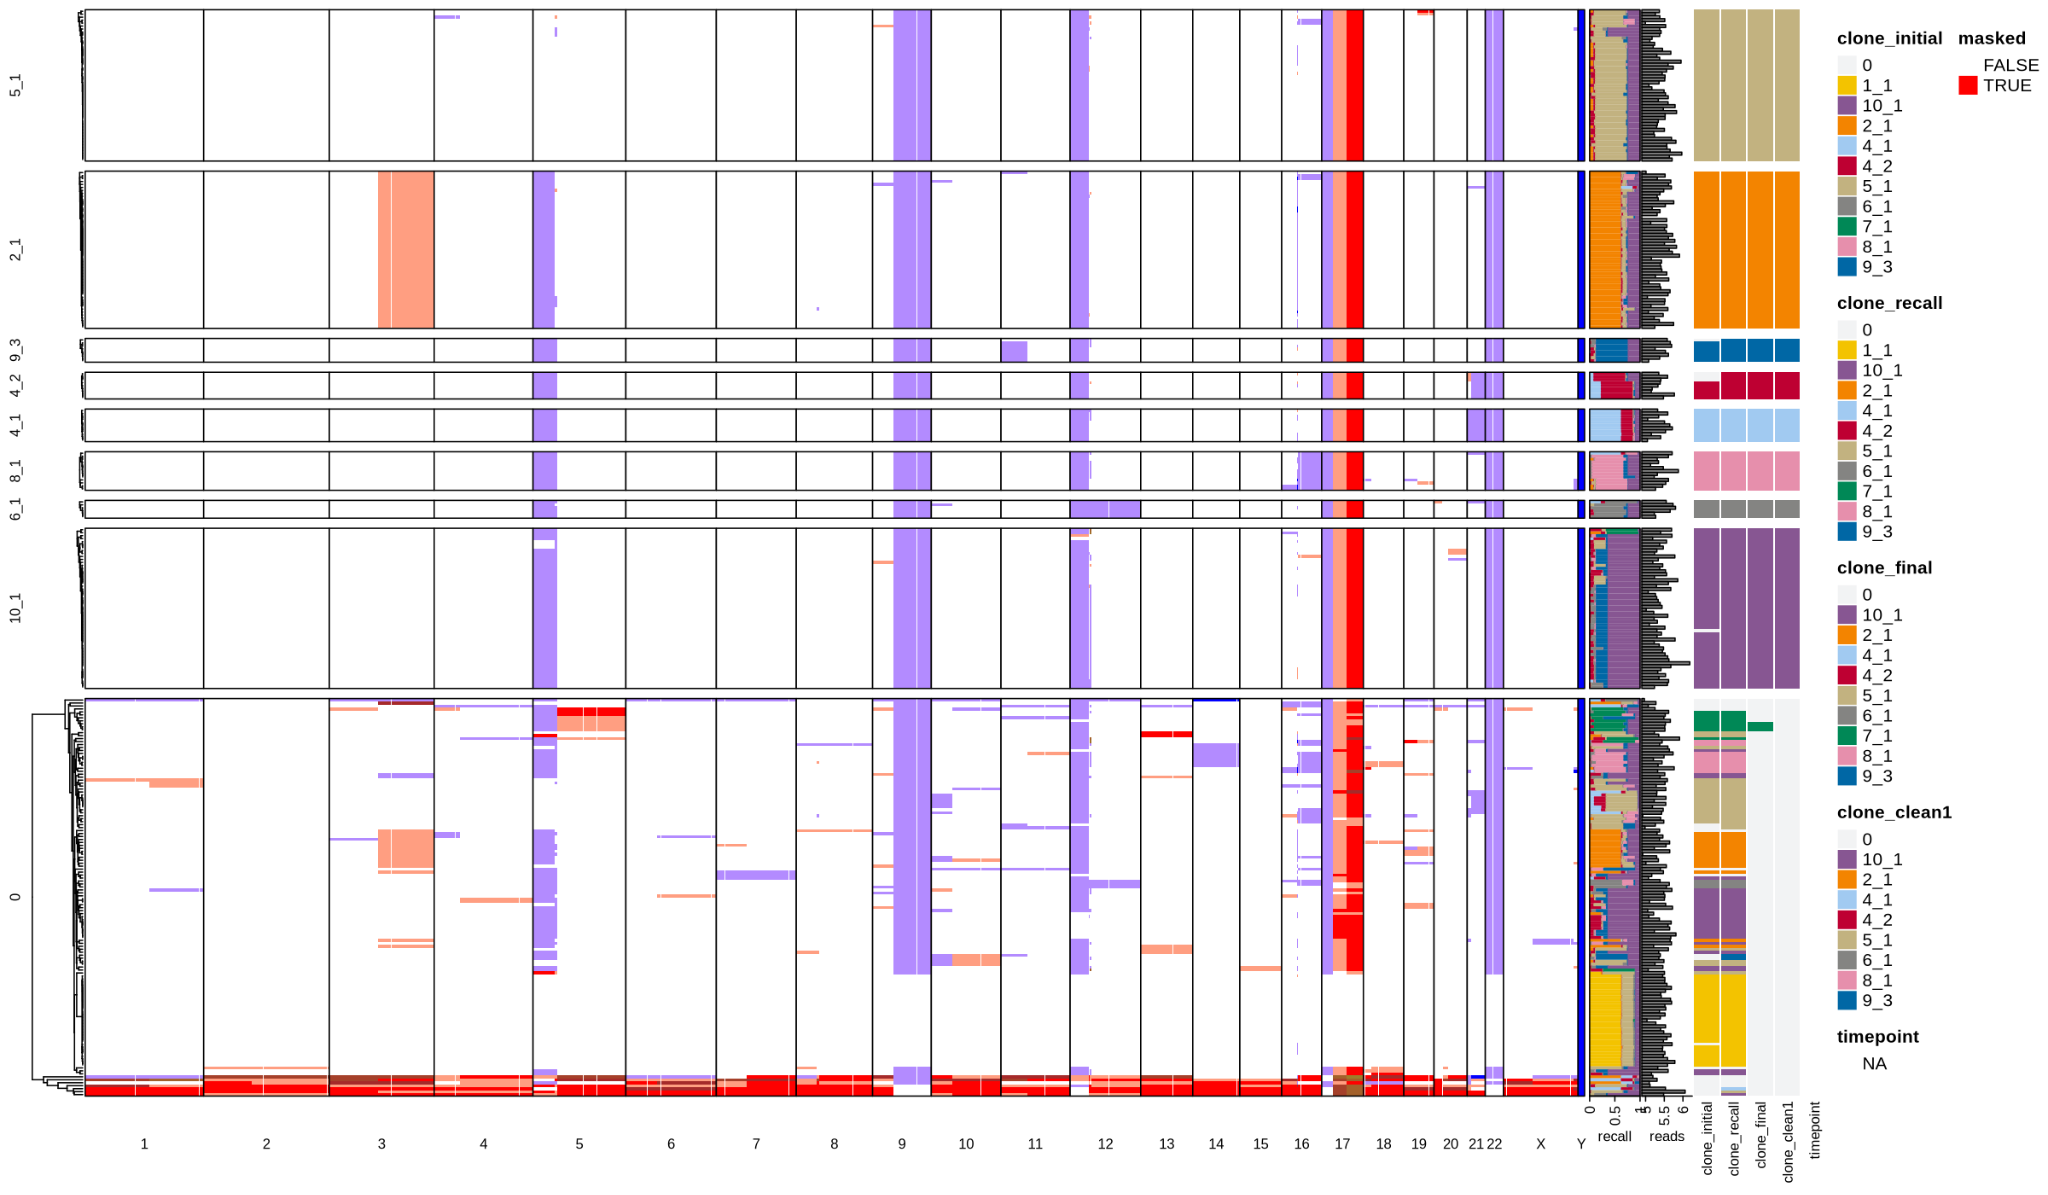


**TRANSIENT**

SRC26


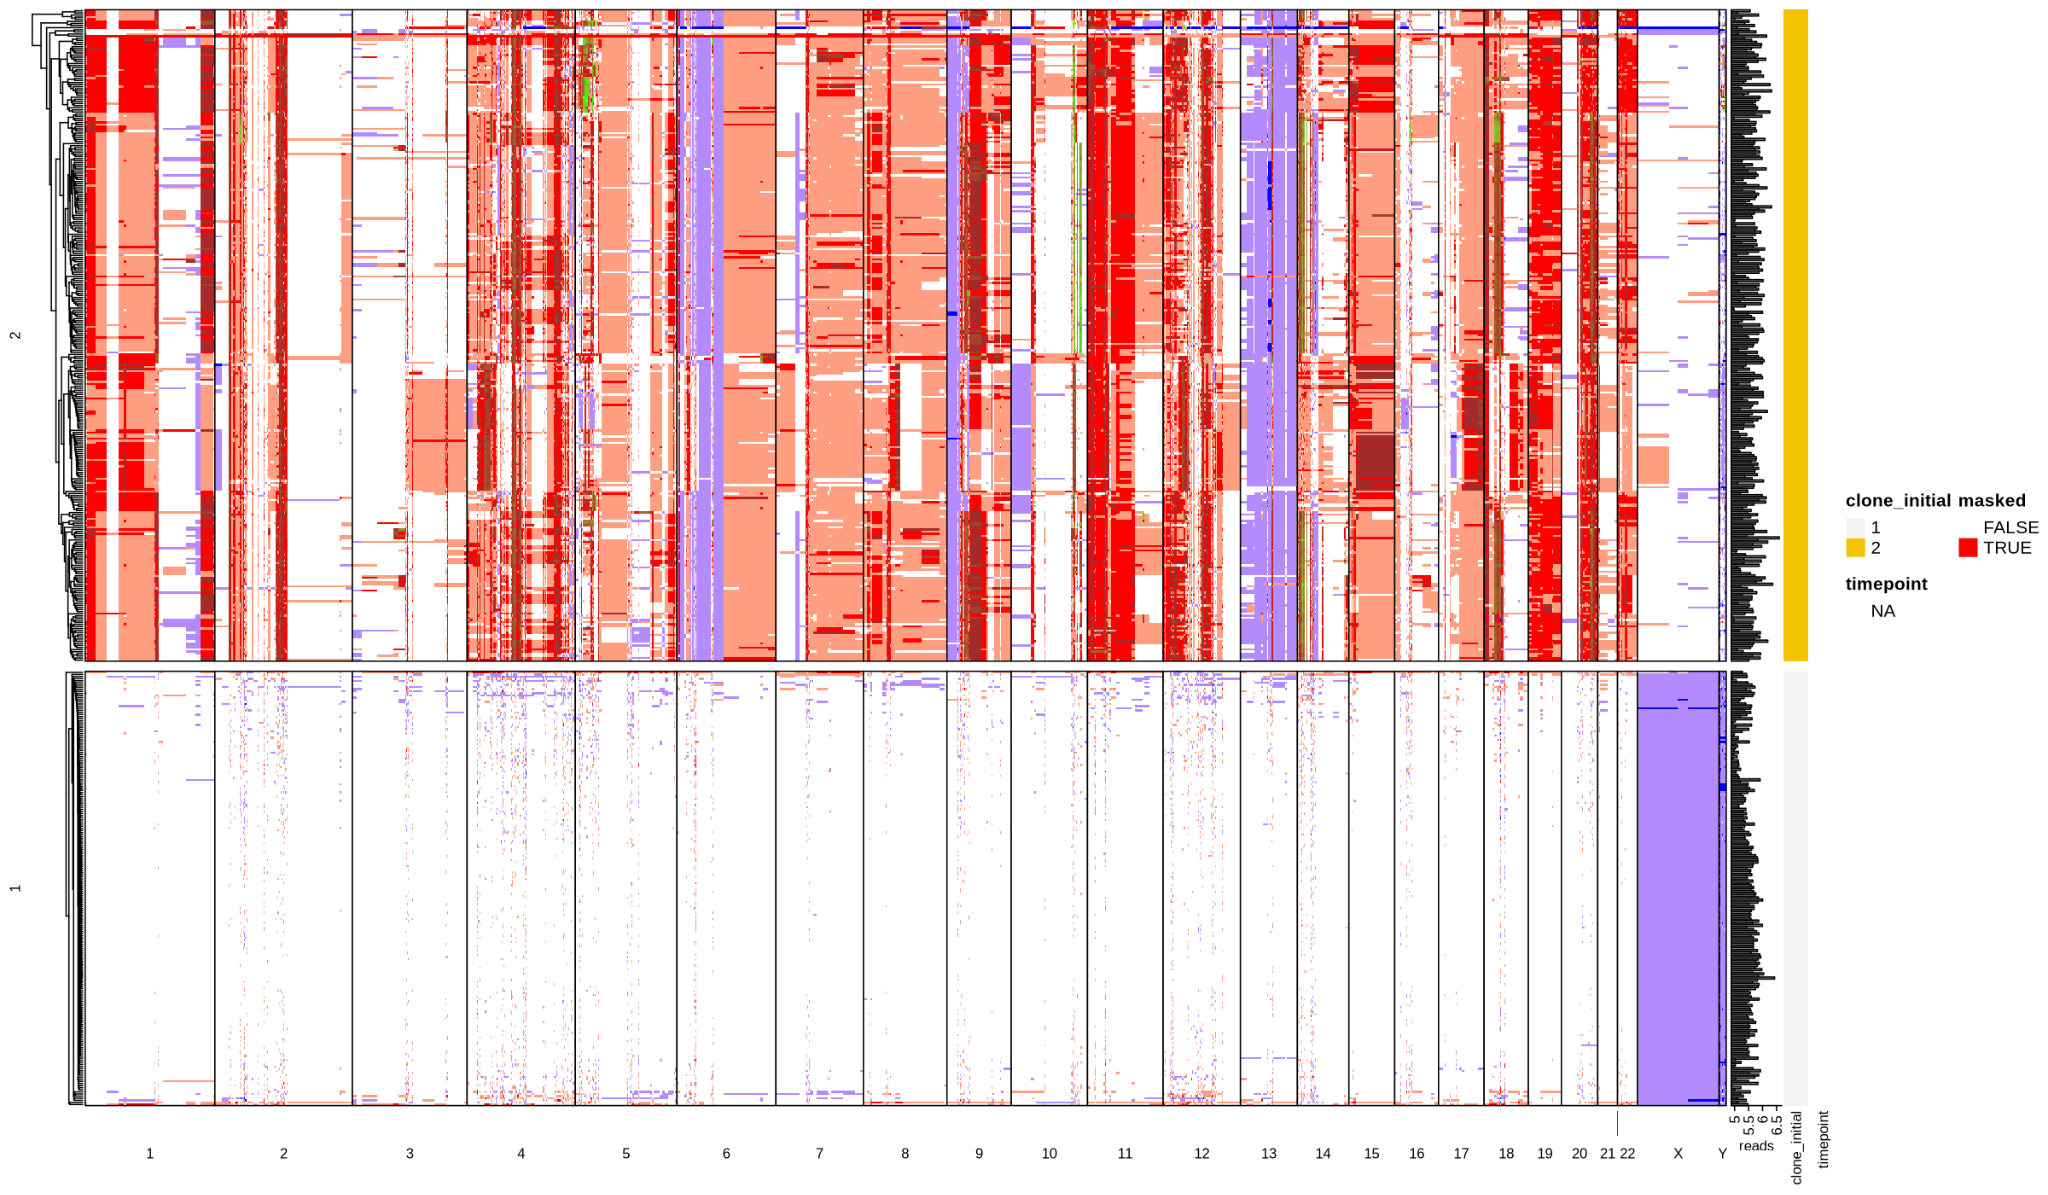


SRC39


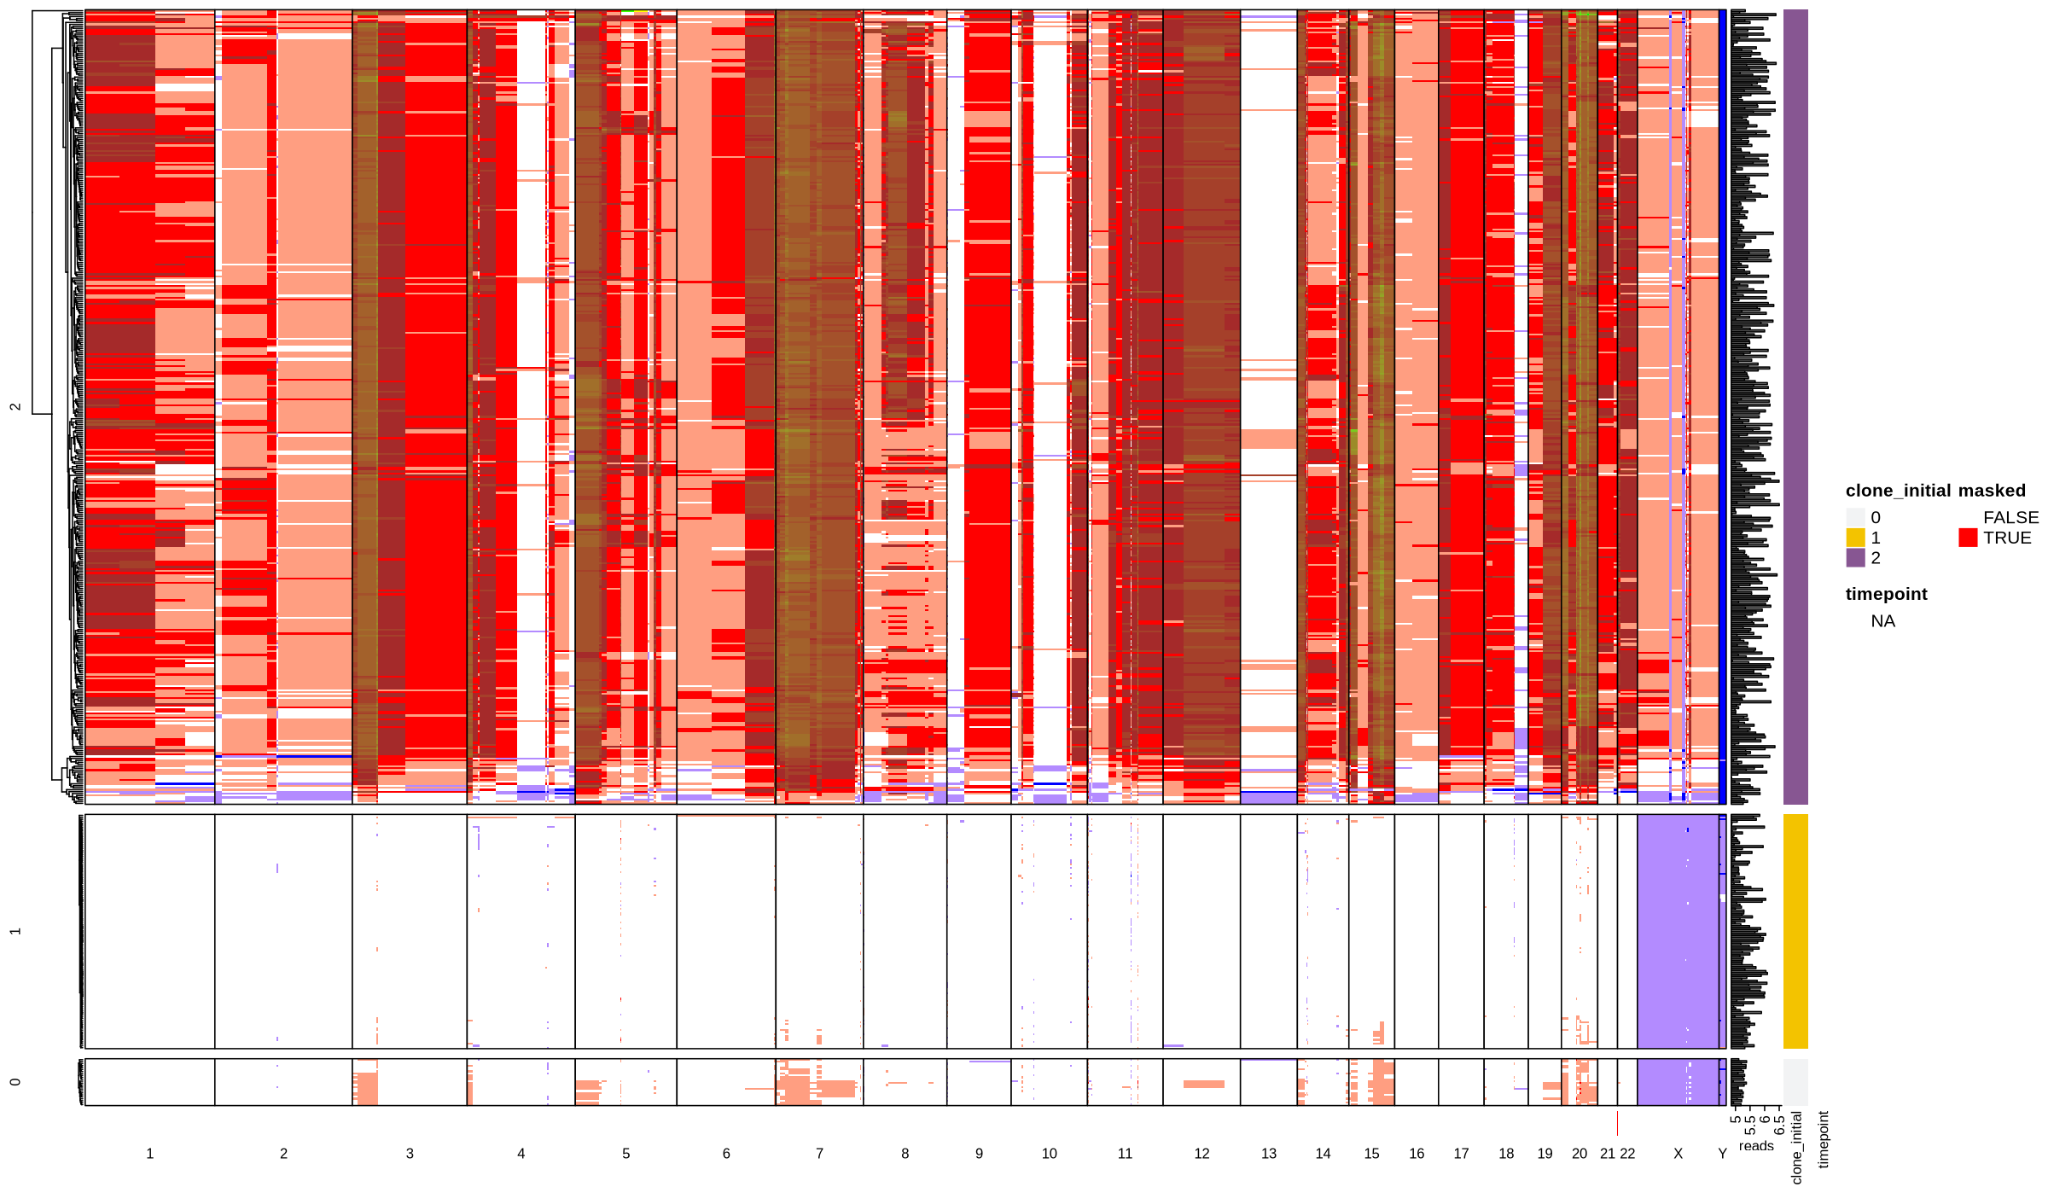


SRC32


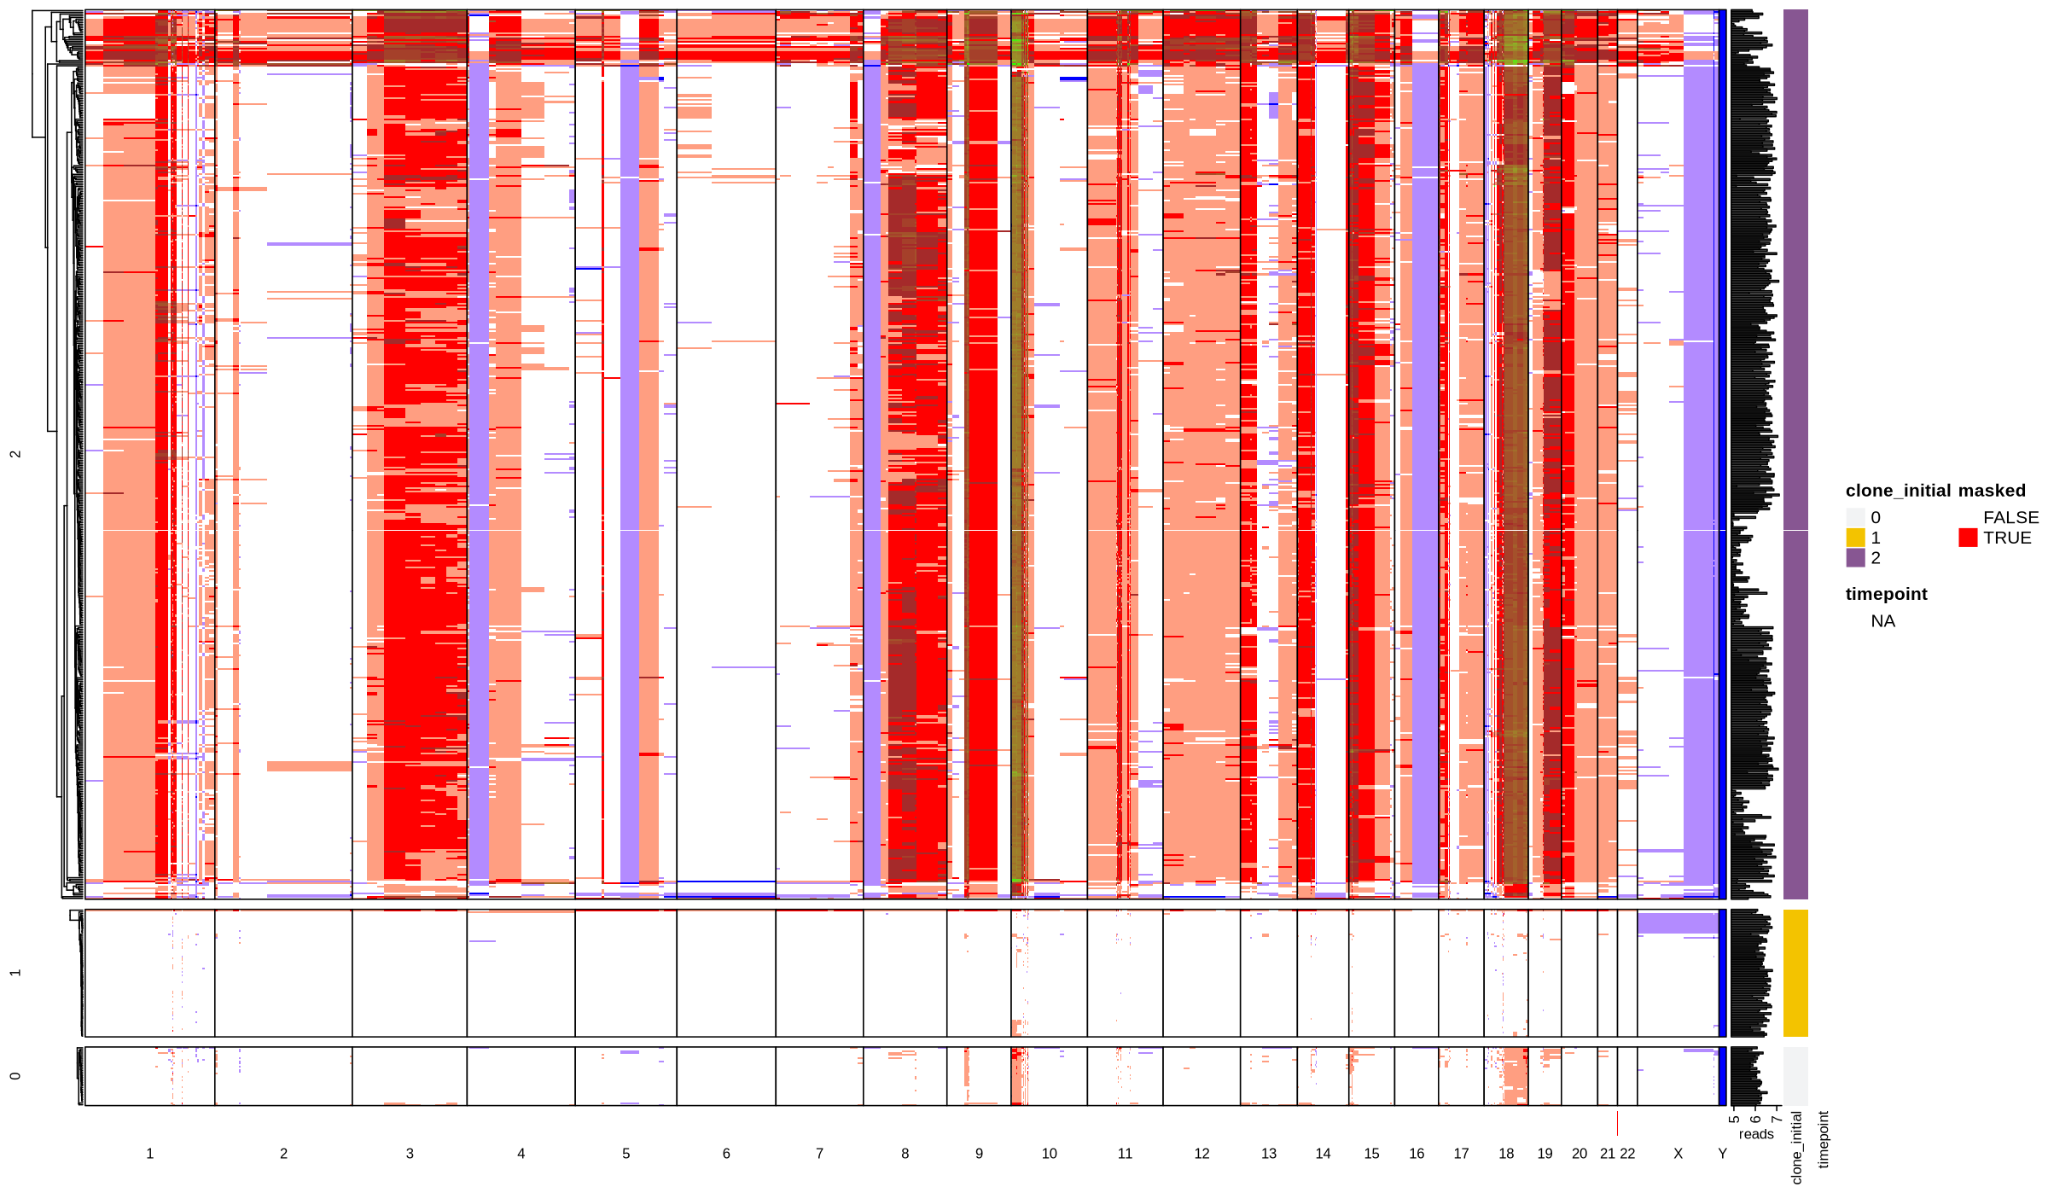


SRC29


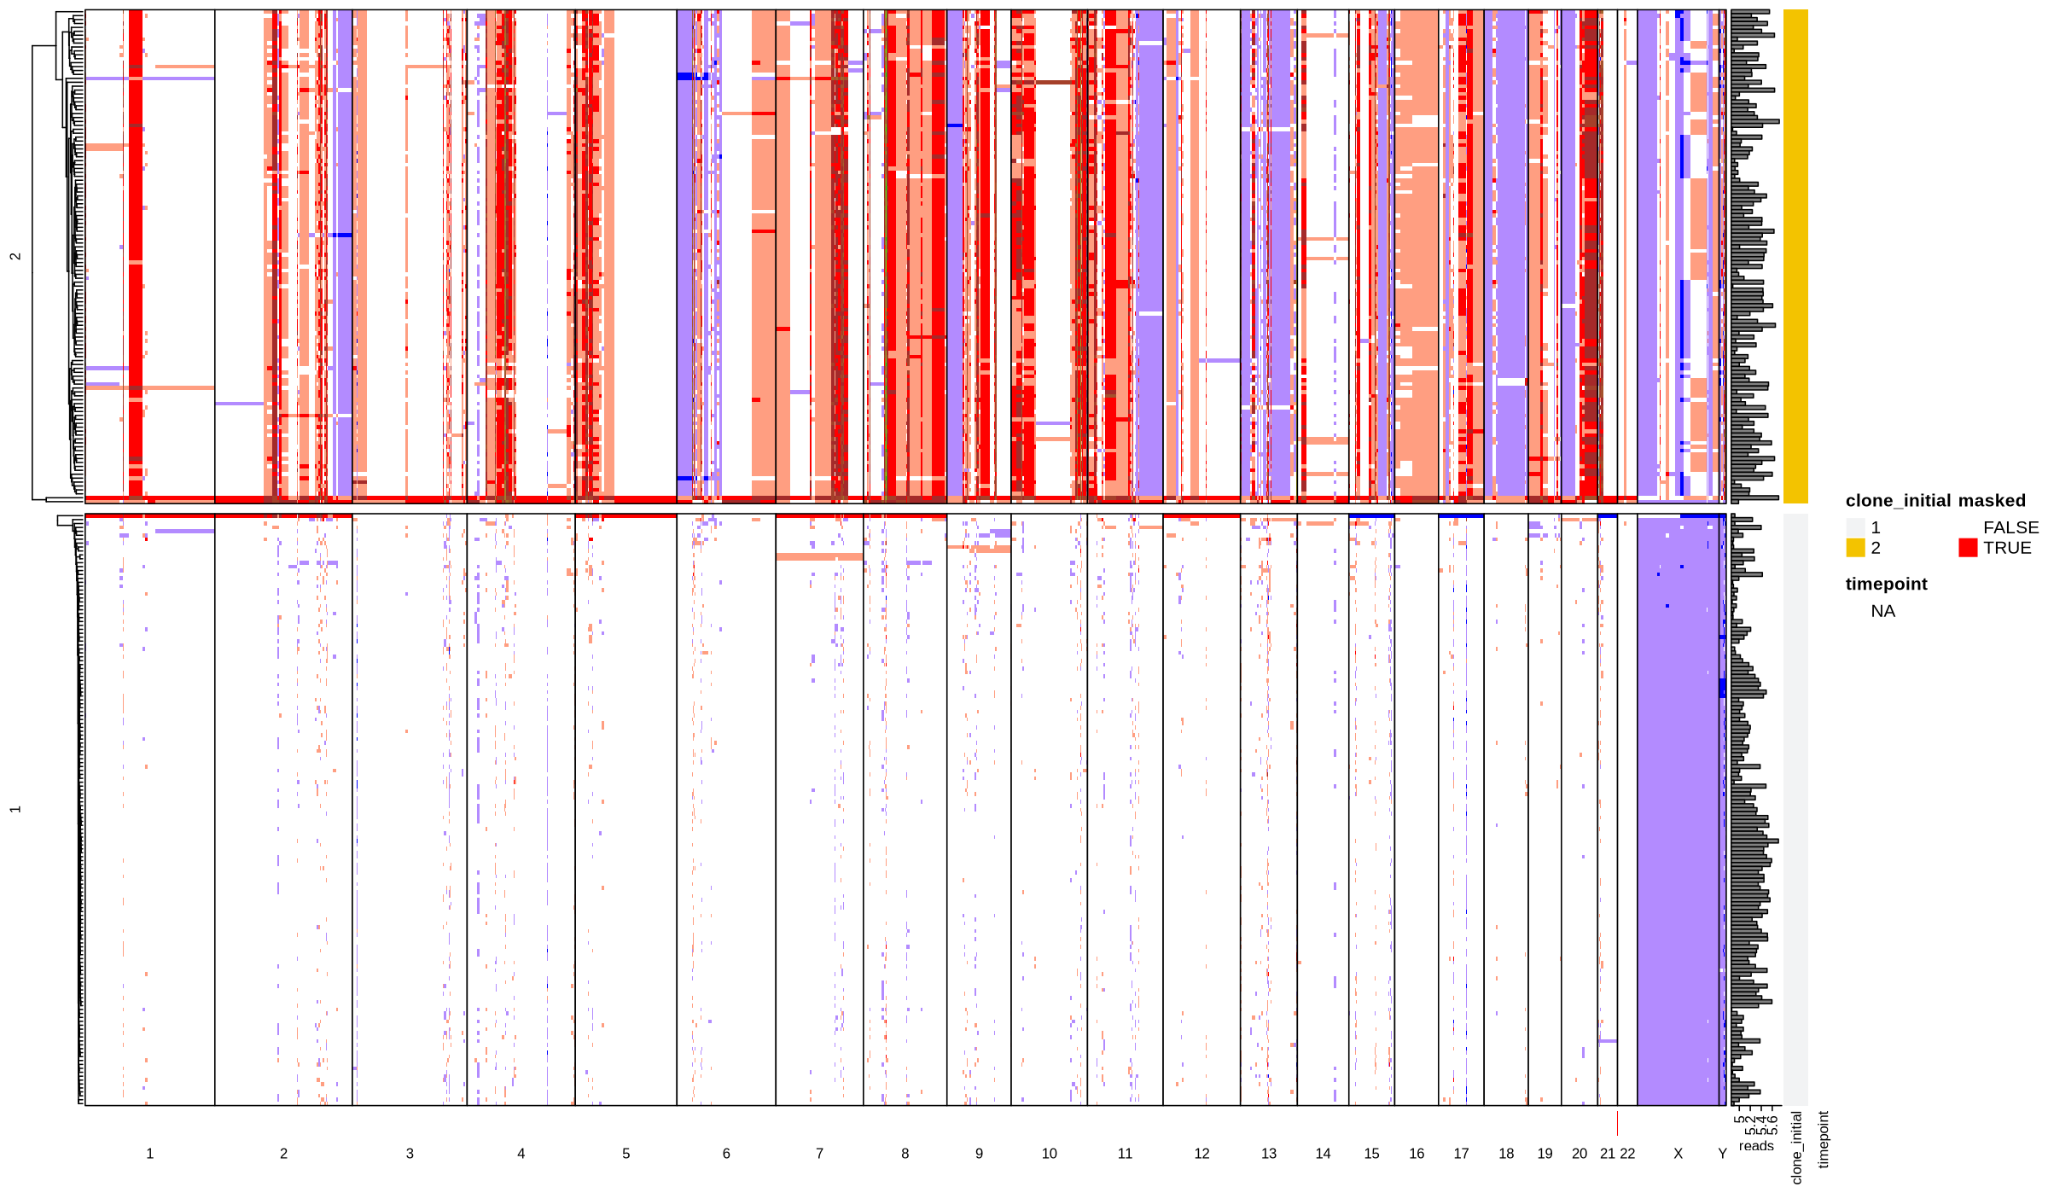


SRC24


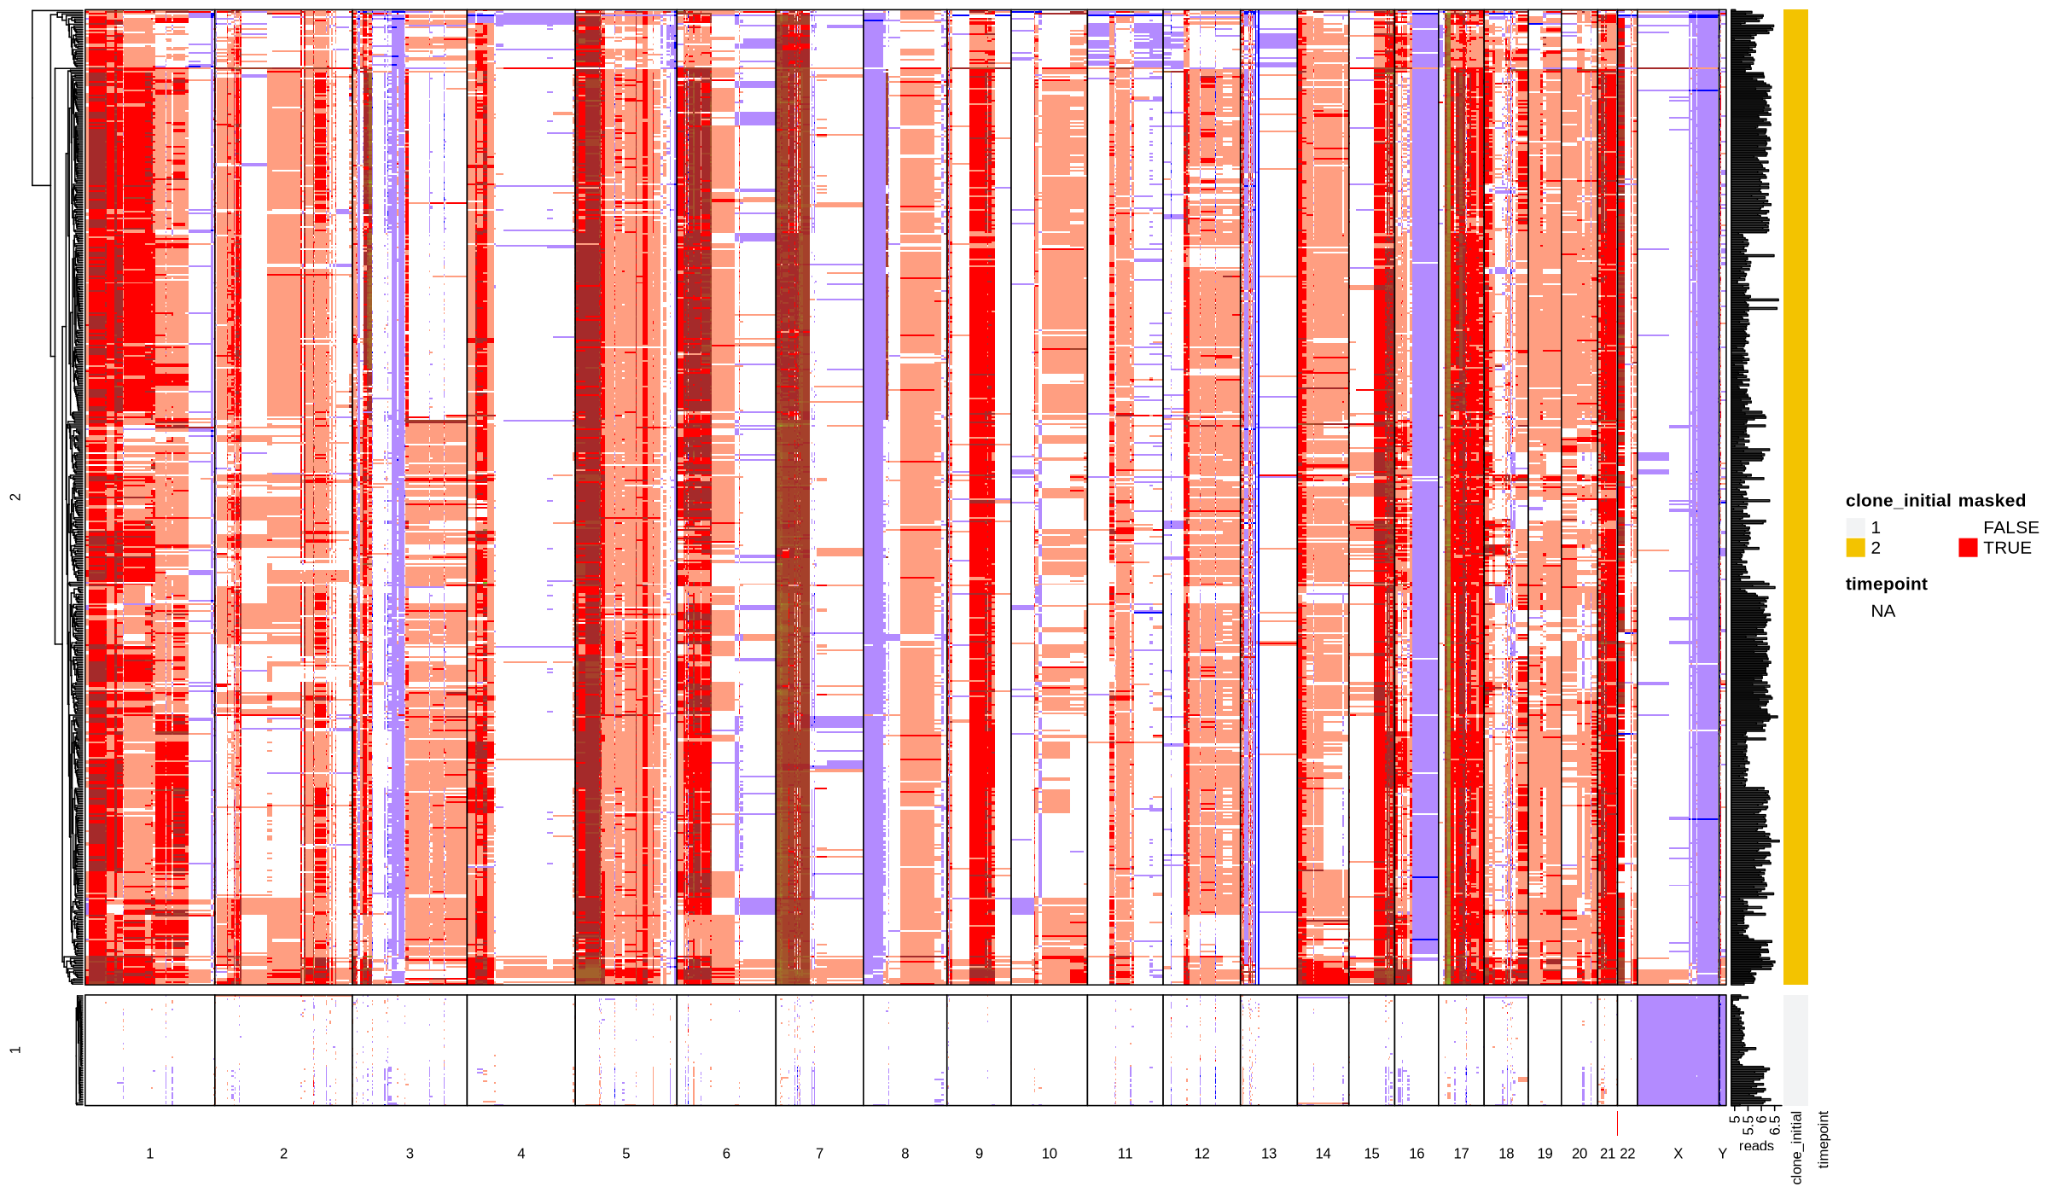


SRC16


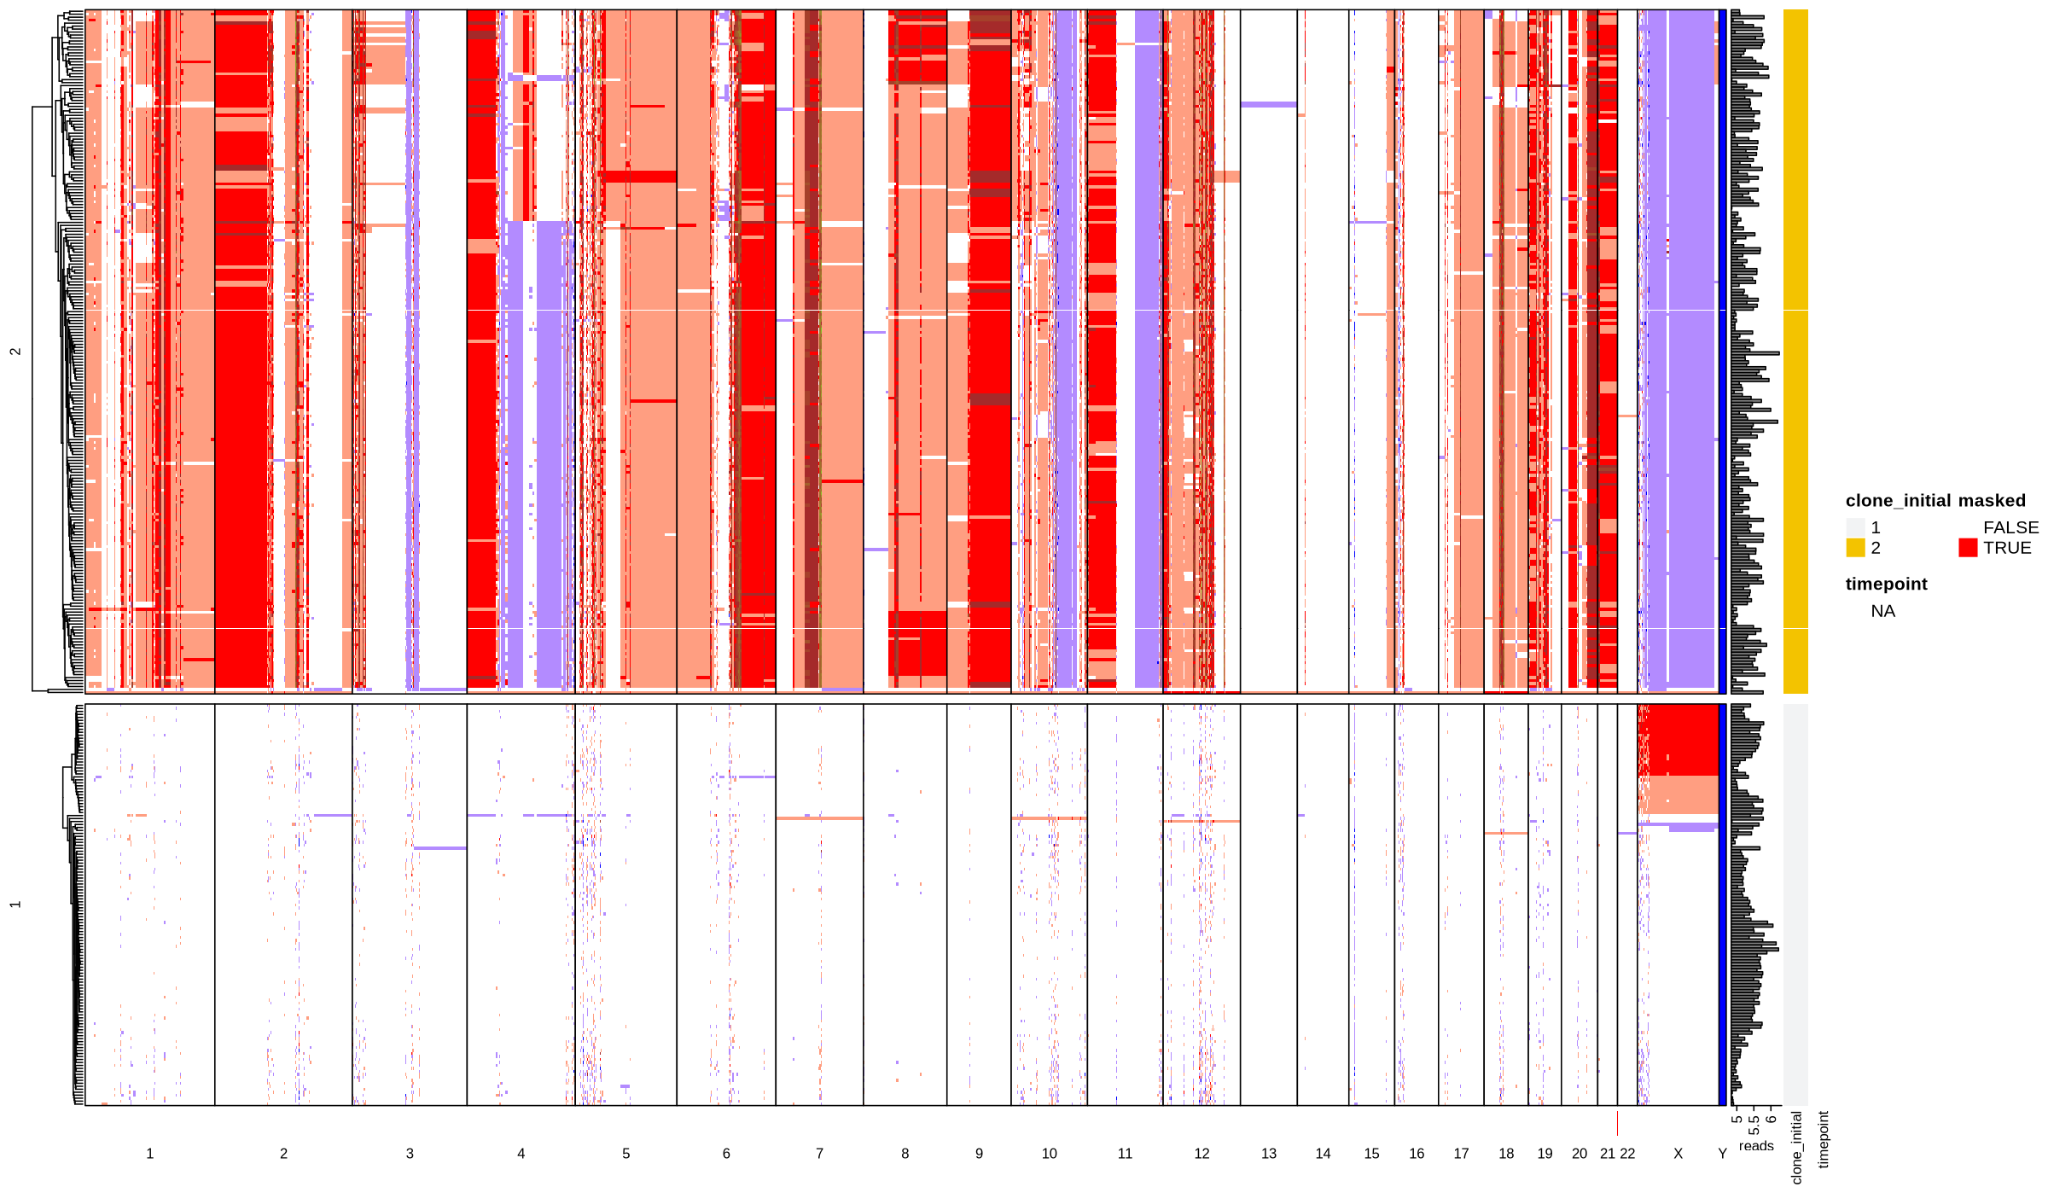


OC3


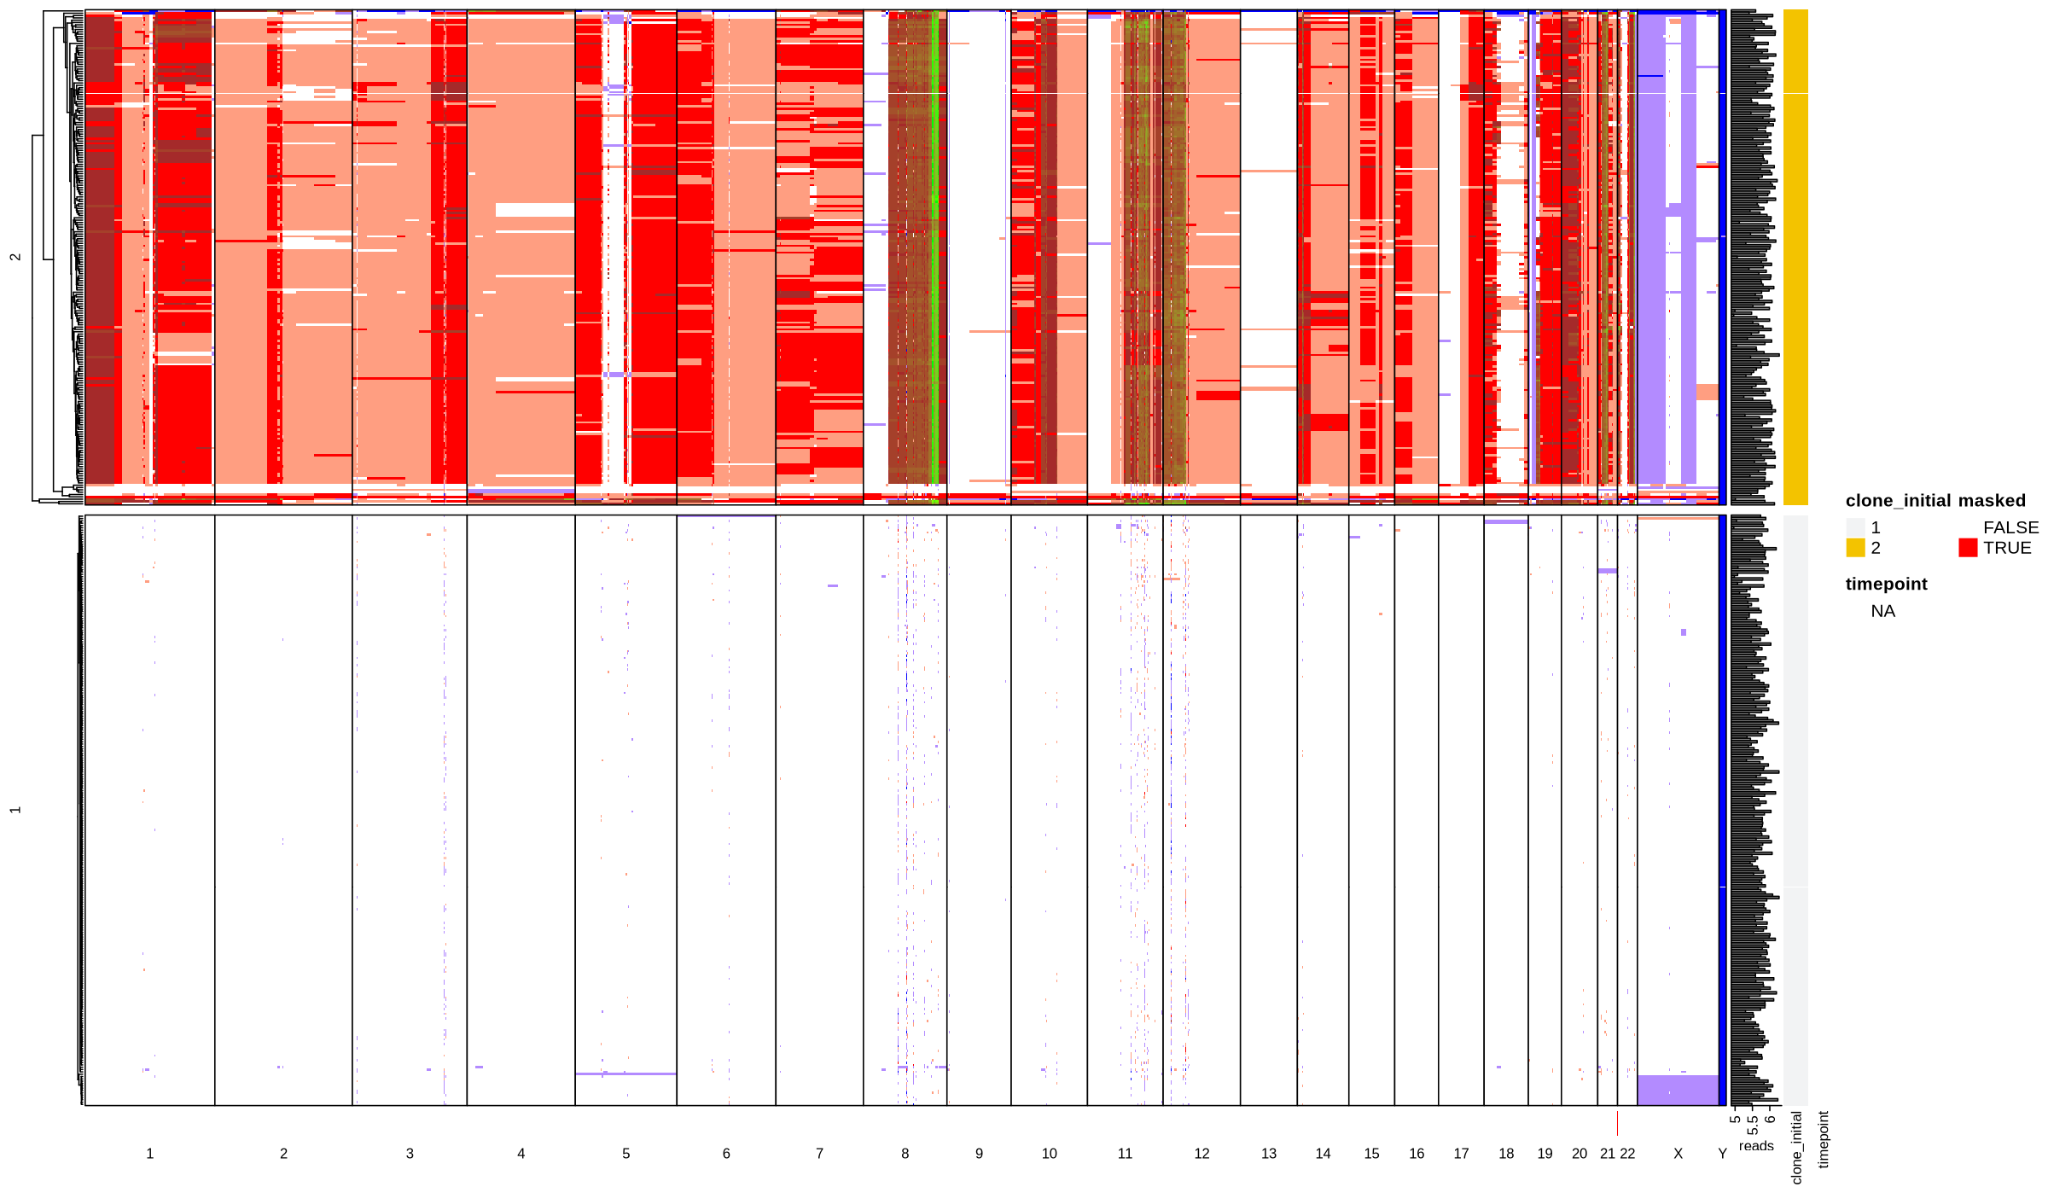


OC6


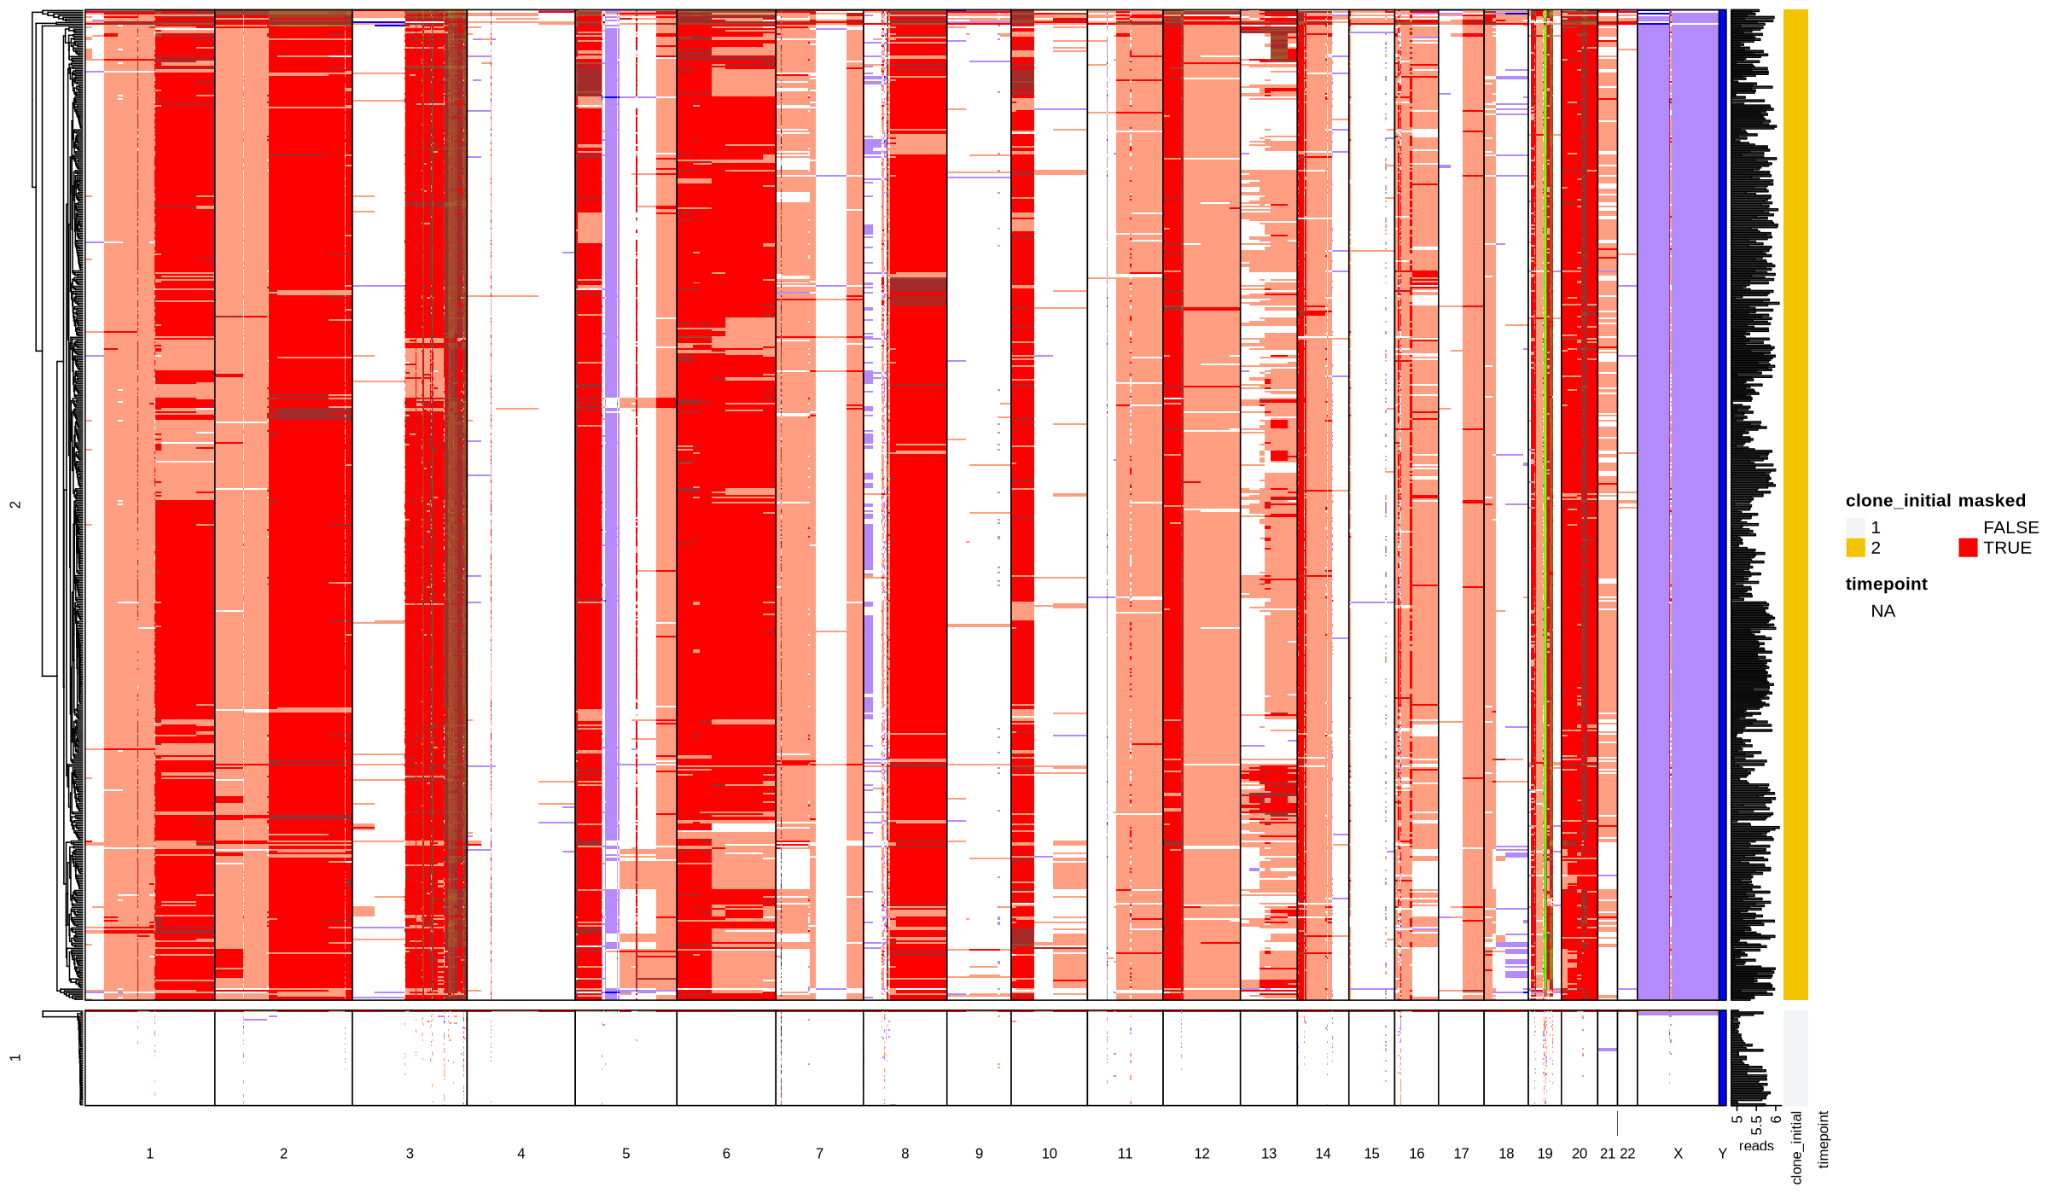


OC8


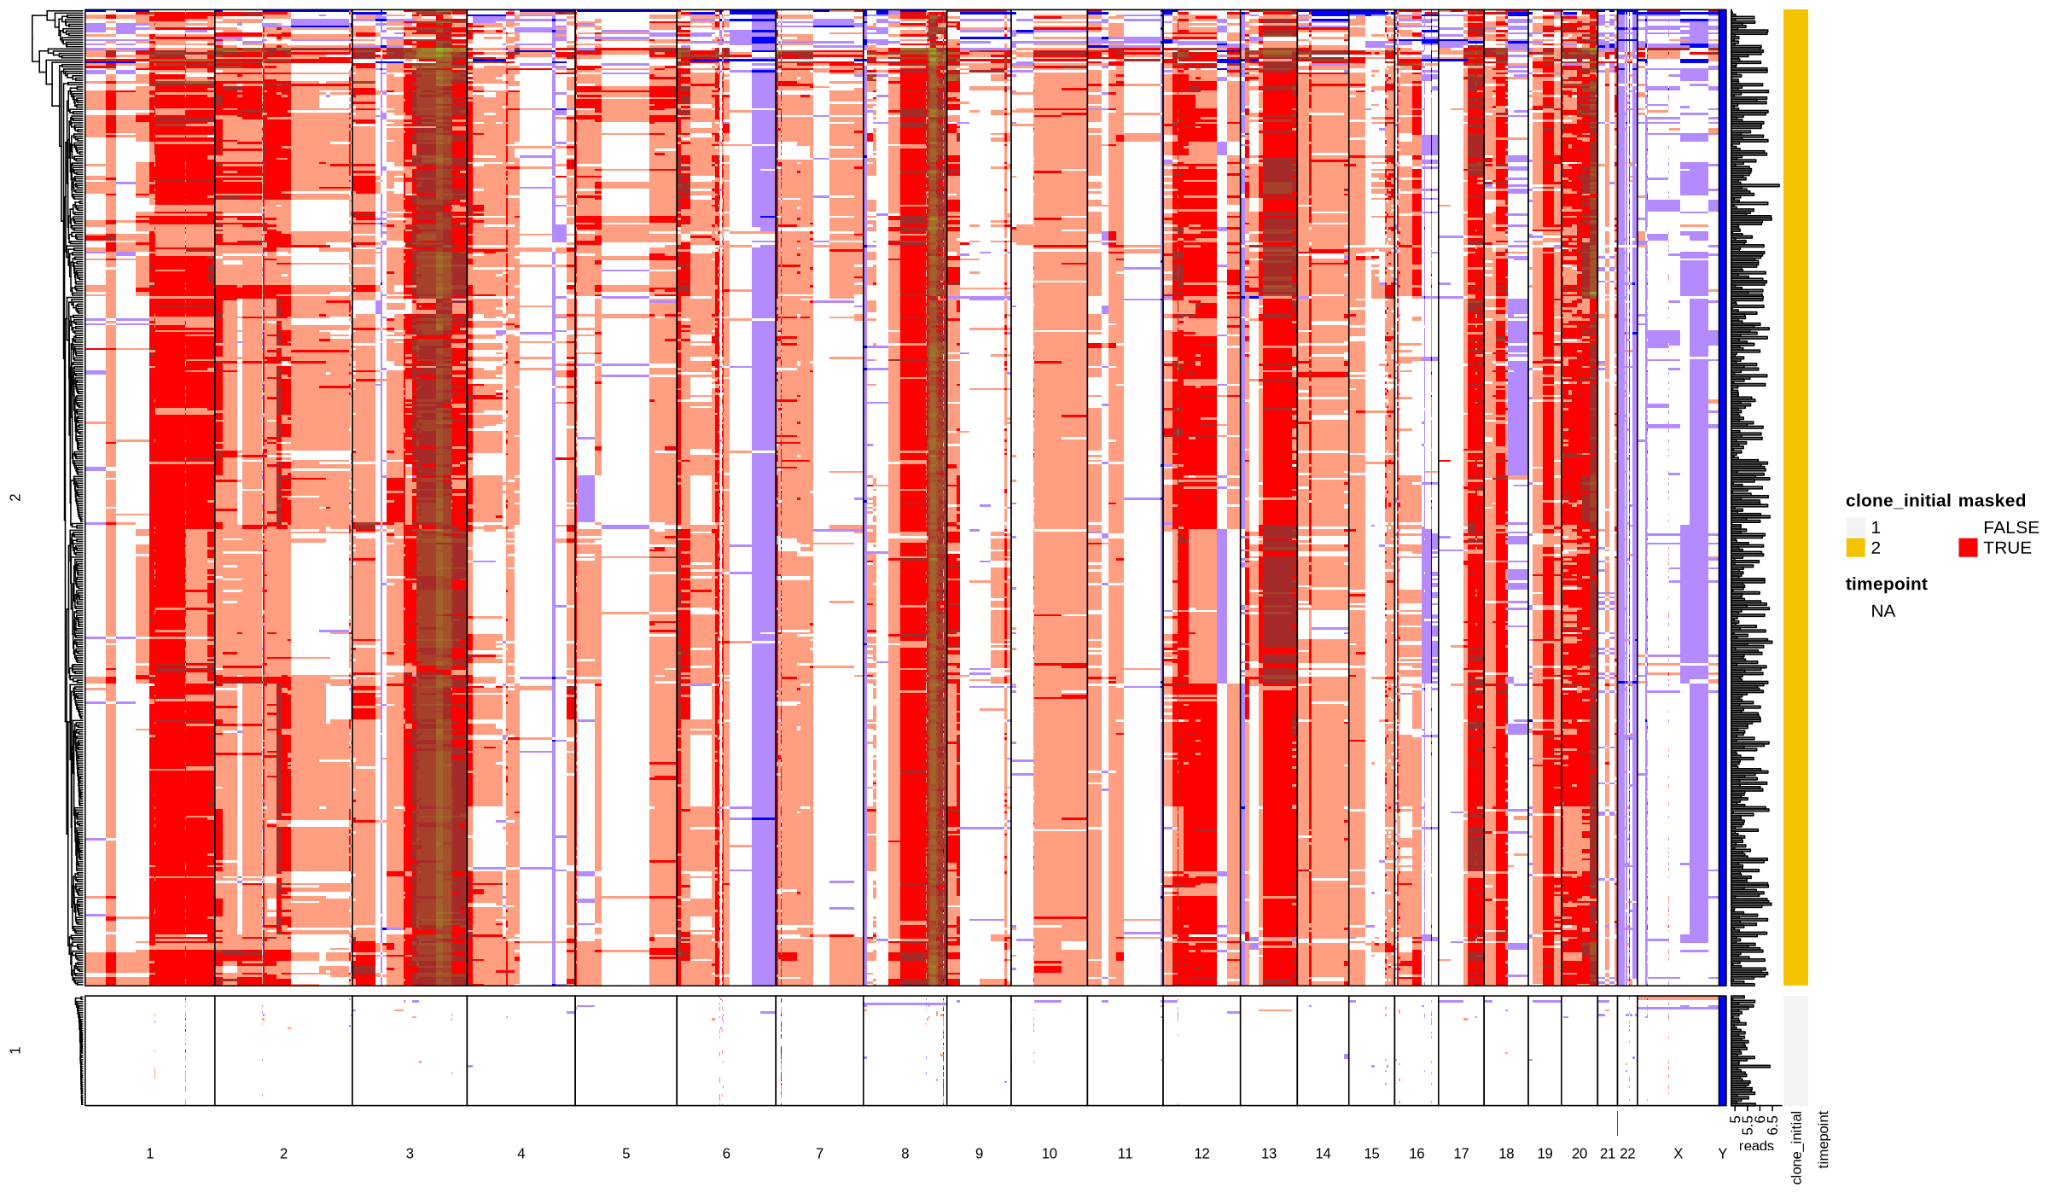


BC8


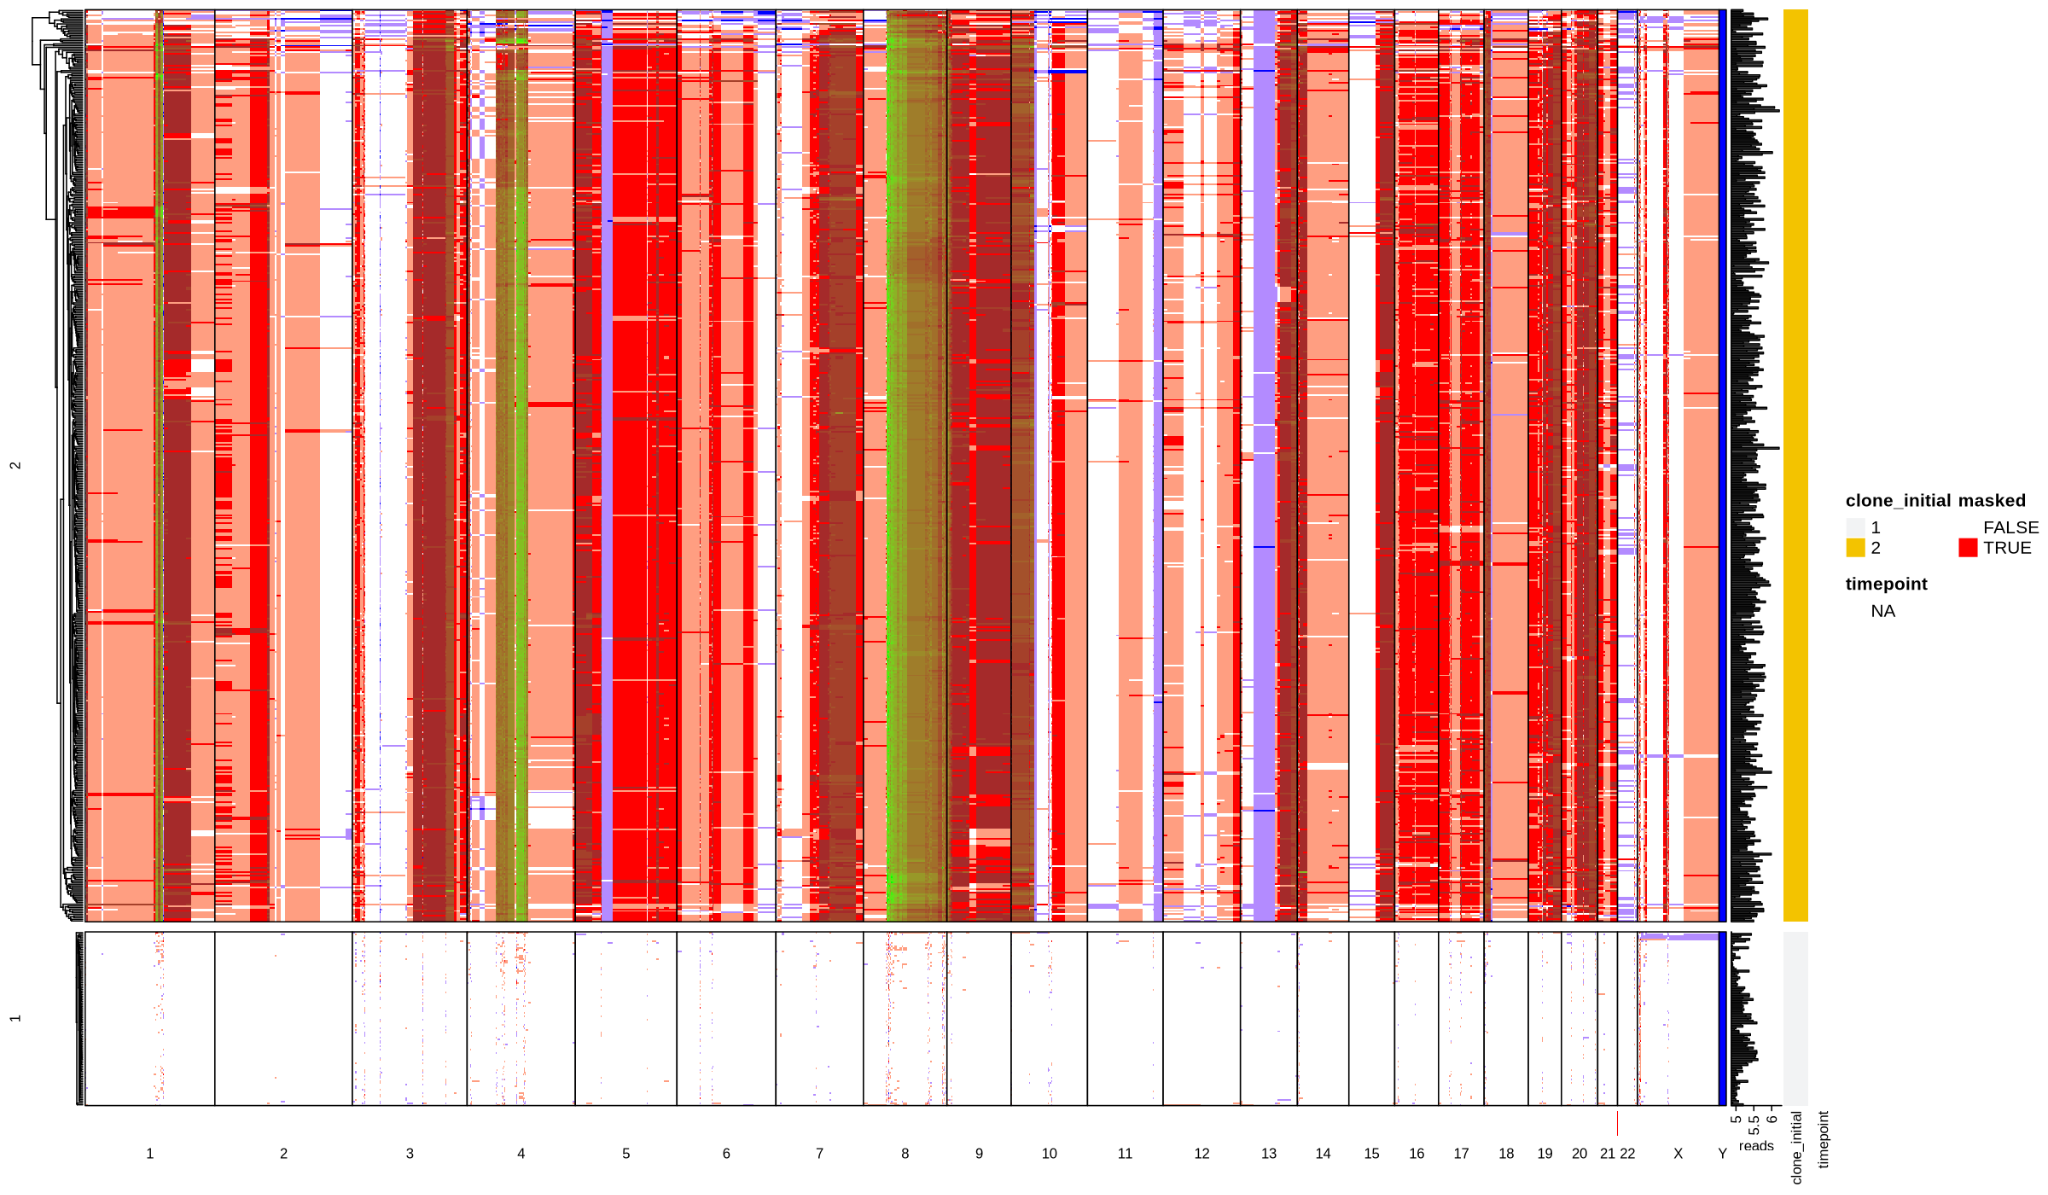

Supplement: Extended data figure [file 711906_file05.docx]
