# Supplementary material for: Principles of subclonal gene dosage across human cancer
Source: bioRxiv preprint, doi:10.64898/2026.03.15.711906, version 1 (2026-03-18)
Supplement: Table 1 [file 711906_file04.xlsx]

## Sheet: SupplementaryTable1
Patient ID	OncoFusion	PathogenicSNV	Sequencing platform	Read-pair sequenced	Aneuploid DNA libraries passed QC	Diploid DNA libraries passed QC	RNA libraries passed QC	Clonal/Transient	Cancer type	Cancer subtype
ALL_1	NA	NA	nextseq550	2x37	103	61	159	Clonal	ALL	High hyperdiploid
ALL_2	NA	NA	nextseq550	2x37	124	62	220	Clonal	ALL	B-other
ALL_3	MEF2--BCL9	NA	nextseq550	2x37	234	18	327	Clonal	ALL	MEF2D-rearranged
ALL_35	TCF3--PBX1	NA	nextseq550	2x37	180	23	354	Clonal	ALL	t(1;19)/TCF3::PBX1
ALL_4	NA	NA	nextseq550	2x37	265	52	318	Clonal	ALL	DS-ALL
ALL_40	ETV6--RUNX1	NA	nextseq550	2x37	227	78	319	Clonal	ALL	t(12;21)/ETV6::RUNX1
ALL_42	ETV6--RUNX1, RUNX1--ENSG00000256482	NA	nextseq550	2x37	129	10	300	Clonal	ALL	t(12;21)/ETV6::RUNX1
ALL_47	NA	NA	nextseq550	2x37	214	24	274	Clonal	ALL	High hyperdiploid
ALL_6	ETV6--RUNX1	NA	nextseq550	2x37	199	26	270	Clonal	ALL	t(12;21)
ALL_64	NA	NA	nextseq550	2x37	197	26	336	Clonal	ALL	High hyperdiploid
ALL_66	RUNX1--ETV6	NA	nextseq550	2x37	213	58	276	Clonal	ALL	t(12;21)
ALL_67	NA	NA	nextseq550	2x37	251	90	343	Clonal	ALL	High hyperdiploid
ALL_68	NA	NA	nextseq550	2x37	170	63	363	Clonal	ALL	High hyperdiploid
ALL_71	NA	PTPN11	nextseq550	2x37	297	37	324	Clonal	ALL	High hyperdiploid
ALL_8	NA	NA	nextseq550	2x37	133	42	346	Clonal	ALL	High hyperdiploid
BC_4	NA	NA	nextseq550	2x37	229	54	274	Clonal	BC	ER+PR+HER2-
MEL_6	NA	NRAS, PEX2	nextseq550	2x37	218	33	281	Clonal	MEL
MEL_5	NA	CAVIN1, MSH6, NRAS	nextseq550	2x37	300	61	303	Clonal	MEL
SRC_20	NA	NA	nextseq550	2x37	191	16	344	Clonal	SRC	Gastrointestinal stromal tumor
SRC_21	NA	SDHA	nextseq550	2x37	222	19	319	Clonal	SRC	Gastrointestinal stromal tumor
SRC_23	NA	KARS1, TP53	nextseq550	2x37	328	12	398	Clonal	SRC	Leiomyosarcoma
SRC_24	ADPRM--RAP1B, CBLB--FSIP1, JAZF1--SUZ12	LRPPRC	nextseq550	2x37	230	135	632	Transient	SRC	Leiomyosarcoma
SRC_27	CSF1--CD101	NA	nextseq550	2x37	158	82	258	Clonal	SRC	Tenosynovial giant cell tumor
SRC_16	NRIP1--ITGB2	NA	novaseq6000	2x150	573	65	691	Transient	SRC	Myxofibrosarcoma
SRC_26	ZFP64--ENSG00000289035, MDM2--BMPR1B-DT	PDE4DIP	novaseq6000	2x150	309	206	523	Transient	SRC	Myxofibrosarcoma
SRC_29	NA	BARD1, TP53	novaseq6000	2x150	492	61	516	Transient	SRC	Leiomyosarcoma
SRC_32	CHIC2--ENSG00000289530, CRTC3--LIPI, PLEKHMI1--CD44	ADK, COL6A3, NAGA, PDE4DIP, TPP1, TRPM4	novaseq6000	2x150	126	151	316	Transient	SRC	Undifferentiated plemorphic sarcoma
SRC_35	NA	NA	novaseq6000	2x150	169	169	324	Clonal	SRC	Leiomyosarcoma
SRC_39	NA	CNOT3	novaseq6000	2x150	386	120	624	Transient	SRC	Myxofibrosarcoma
MEL_1	NA	ARHGEF1, NRAS	novaseq6000	2x150	492	112	627	Clonal	MEL
MEL_2	NA	NA	novaseq6000	2x150	291	39	327	Clonal	MEL
MEL_3	NA	CDKN2A, EPS8	novaseq6000	2x150	232	59	310	Clonal	MEL
MEL_4	COX6CP1--COX6C, TMED2-DT--TTLL3	ACSF3, NRAS	novaseq6000	2x150	339	31	345	Clonal	MEL
BC_11	KDM6A--NLGN4X	PIK3R1	novaseq6000	2x150	468	409	904	Clonal	BC	Triple negative
BC_13	NA	ADK	novaseq6000	2x150	570	228	892	Clonal	BC	ER+PR+HER2-
BC_16	NA	PHYH	novaseq6000	2x150	472	19	190	Clonal	BC	ER+PR+HER2-
BC_19	EXOC4--MYT1, PAAF1--EXOC4	NA	novaseq6000	2x150	247	106	348	Clonal	BC	ER+PR+HER2+
BC_20	NA	NA	novaseq6000	2x150	544	66	726	Clonal	BC	ER+PR+HER2-
BC_26	NA	ADK, PBX1, PCNT, PIK3CA	novaseq6000	2x150	615	19	685	Clonal	BC	ER+PR+HER2-
BC_28	NFIC--ENSG00000290812, TMED2-DT--TTLL3	NA	novaseq6000	2x150	234	160	303	Clonal	BC	ER+PR+HER2-
BC_30	NA	CPT2, RUBCN	novaseq6000	2x150	316	39	318	Clonal	BC	ER+PR+HER2-
BC_38	NA	NDUFV1	novaseq6000	2x150	324	17	342	Clonal	BC	ER+PR+HER2+
BC_8	S100A10--ENSG00000248702, SORBS2--MPP1	SAA1, TP53	novaseq6000	2x150	546	104	622	Transient	BC	Triple negative
AML_2	NA	NA	novaseq6000	2x150	280	13	296	Clonal	AML
AML_4	NA	NA	novaseq6000	2x150	327	26	339	Clonal	AML
AML_5	NA	PIEZO1	novaseq6000	2x150	240	21	302	Clonal	AML
AML_6	NA	NA	novaseq6000	2x150	209	0	348	Clonal	AML
AML_9	NA	NA	novaseq6000	2x150	366	0	330	Clonal	AML
OC_8	CREBBP--ENSG00000283480	NA	novaseq6000	2x150	431	44	434	Transient	OC
OC_6	NA	NA	novaseq6000	2x150	582	56	675	Transient	OC
OC_9	NA	PDE4DIP, TP53	novaseq6000	2x150	650	51	708	Clonal	OC
OC_7	TMED2-DT--TTLL3	MAN2B1	novaseq6000	2x150	182	24	325	Clonal	OC
OC_1	BAZ1A--RAD51B	NA	novaseq6000	2x150	237	94	696	Clonal	OC
OC_2	NA	NA	novaseq6000	2x150	238	297	597	Clonal	OC
OC_3	NA	ADK, SAA1, TP53	novaseq6000	2x150	207	260	576	Transient	OC
OC_4	NA	NA	novaseq6000	2x150	313	315	665	Clonal	OC
OC_5	NA	NA	novaseq6000	2x150	275	51	332	Clonal	OC
